# Supplementary material for: Highly enantioselective access to chiral chromanes and thiochromanes via Cu-catalyzed hydroamination with anthranils
Source: Royal Society of Chemistry journal article supplement (doi:10.1039/d1qo00030f), 2021-01-01
Supplement: d1qo00030f1.pdf [file d1qo00030f1.pdf]

# Highly Enantioselective Access to Chiral Chromanes and Thiochromanes via Cu-Catalyzed Hydroamination with Anthranils

Xiaodong Gu,<sup>a</sup> Ling Meng<sup>b,c</sup> Mingliang Li<sup>a</sup> and Jun (Joelle) Wang<sup>\*a,b</sup>

<sup>a</sup> Department of Chemistry, Southern University of Science and Technology, Shenzhen 518055, China

<sup>b</sup> Department of Chemistry, Hong Kong Baptist University, Kowloon, Hong Kong

<sup>c</sup> Institute of Research and Continuing Education, Hong Kong Baptist University Shenzhen 518000, China

## Table of Contents

|                                                                           |     |
|---------------------------------------------------------------------------|-----|
| 1. General Information.....                                               | S2  |
| 2. Procedure for Preparation Chromene and Anthranil Derivatives.....      | S2  |
| 3. General Procedural Information and Optimization of Hydroamination..... | S4  |
| 4. Analytic Data for the Products.....                                    | S7  |
| 5. Reference.....                                                         | S27 |
| 6. NMR Spectrum.....                                                      | S28 |
| 7. HPLC Spectrum.....                                                     | S69 |

## 1. General Information

NMR Spectra were recorded on a Bruker DPX-500 (400) spectrometer at 500 MHz or 400 MHz for  $^1\text{H}$  NMR, 376 MHz for  $^{19}\text{F}$  NMR and 100 MHz or 125 MHz for  $^{13}\text{C}$  NMR in  $\text{CDCl}_3$  with tetramethylsilane (TMS) or the residual deuterated solvent peaks as internal standard. Chemical shifts ( $\delta$ ) are reported in ppm, and coupling constants ( $J$ ) are in Hertz (Hz). The following abbreviations were used to explain the multiplicities: s = singlet, d = doublet, t = triplet, q = quartet, m = multiplet, br = broad. Flash column chromatograph was carried out using 200-300 mesh silica gel at medium pressure. High resolution mass spectra (HRMS) were recorded on a LC-TOF spectrometer. ESI-HRMS data were acquired using a Thermo LTQ Orbitrap XL Instrument equipped with an ESI source. Optical rotation was obtained on a Rudolph Research Analytical (Atopol I). HPLC analysis was performed on Agilent 1260 series, UV detection monitored at 254 nm, using a Chiralcel OD-H or AD-H column with hexane and *i*-PrOH as the eluent. Unless otherwise noted, all reagents were purchased from commercial suppliers and used without purification. All air- and moisture-sensitive manipulations were carried out with standard Schlenk techniques under nitrogen or in a glove box under argon. Anhydrous toluene, THF (Tetrahydrofuran) and dioxane were distilled from sodium benzophenone prior to use. Anhydrous DCE and  $\text{CH}_3\text{CN}$  were distilled from calcium hydride and stored under argon. Anhydrous DMF was distilled from calcium hydride under reduced pressure and stored under argon.

## 2. Procedure for Preparation Chromene and Anthranil derivatives

### General procedure for the synthesis of Anthranil derivatives<sup>1-4</sup>

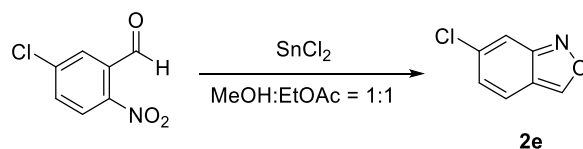

To a solution of 5-chloro-2-nitrobenzaldehyde (10 mmol) in  $\text{MeOH}/\text{EtOAc}$  (20/20 mL) was added  $\text{SnCl}_2$  (5.69 g, 30 mmol) at room temperature. The mixture was stirred for 6-24 hours at room temperature before diluting with DCM (100 mL) followed by quenching with saturated aqueous solution of  $\text{NaHCO}_3$ . The mixture was passed through short celite bed. The organic phase was separated, washed with brine, dried with  $\text{Na}_2\text{SO}_4$  and concentrated. The residue was

subjected to silica gel column chromatography using PE/EA (silica gel, 50:1) as eluent to give 6-chlorobenzo[c]isoxazole (**2e**) as white solid.

Other anthranils **2d-2j**, **2l** were synthesized following similar synthetic procedure. By the way, the method could not give pure **2a-2c,2k** due to acetal which is hard to isolate from anthranils. The pure anthranils were obtained by following method (Sn/AcOH) although in moderate yield.

### General procedure for the synthesis of substrates **2a-2c,2k**<sup>5,6</sup>

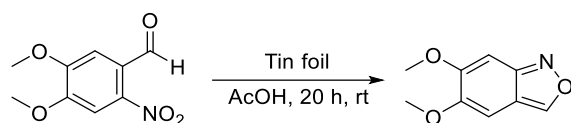

Tin foil (1.30 g, 11 mmol) was added in small pieces to a stirred solution of 4,5-dimethoxy-2-nitrobenzaldehyde (500 mg, 2.39 mmol) in glacial acetic acid (15 mL), and the mixture was stirred at room temperature for 20 h and then worked up with ether and water. The organic layer was dried over anhydrous  $\text{Na}_2\text{SO}_4$ , solvent was removed under reduced pressure, and the residue was purified by column chromatography (silica gel, PE/EA (8:2)), affording anthranil **2k** (230 mg, 54 %) in the form of white needles.

### A general procedure for the synthesis of *2H*-chromene **1b-c**, **1f-1g**, **1i**.<sup>7</sup>

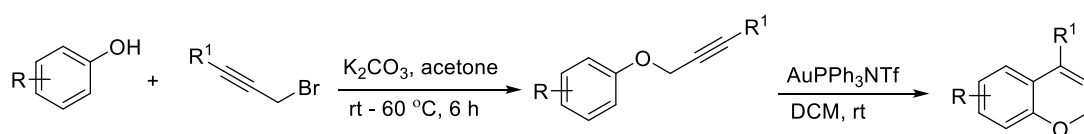

A solution of phenol (5 mmol) was added  $\text{K}_2\text{CO}_3$  (2 equiv) in acetone. The reaction mixture was stirred at room temperature. After 15 mins, 1.5 equiv of propargyl bromide or 1-bromo-2-butyne were added. The resulting mixture was stirred at  $60\text{ }^\circ\text{C}$  overnight, and the reaction was stopped by filtration and evaporation under vacuum. The crude product was extracted with ethyl acetate, washed by saturated brine. It was dried over anhydrous  $\text{Na}_2\text{SO}_4$  and then solvent was removed. The crude product was purified by silica gel chromatography.

---

To a solution of aryl propargyl ethers (2.5 mmol) in dry CH<sub>2</sub>Cl<sub>2</sub> (10 mL) was added Ph<sub>3</sub>PAuNTf<sub>2</sub> (19 mg, 1 mol %) at room temperature. After disappearance of the starting material (TLC and/or GC analysis), the reaction was concentrated under vacuum, and the residue was purified by chromatography (hexane/ethyl acetate, 50:1) through a short pad of silica gel to obtain 2*H*-chronenes.

**Synthesis of 1a, 1d-e, 1h, 1j-1o.** They were prepared according to the reported procedure.<sup>8</sup>

### 3. General Procedural Information and Optimization of Hydroamination

#### Typical Reaction Conditions for Synthesis of Chiral Amine.

A flame-dried pressure tube (15 mL) equipped with a magnetic stir barr (10 mm × 5 mm, egg shaped) was evacuated and filled Ar for three times before being transferred into a glovebox. CuOAc (0.01 mmol, 5 mol %), (*S,S*)-(Ph-BPE) (0.011 mmol, 5.5 mol %) and dry toluene (1 mL) was added to the tube stirring for 10 min. PhSiH<sub>3</sub> (50 μL, 0.4 mmol, 2 equiv) was then added. This mixture was stirred for 30 min as a homogenous solution formed. At this time, chromene substrate (0.2 mmol, 1 equiv), fresh anthranil substrate (0.3 mmol, 1.5 equiv) and *t*-BuOH (0.4 mmol, 2 equiv) were added in succession. The reaction tube was capped and taken out of the glovebox. The reaction was stirred at room temperature for 3-12 h. After completion by TLC, a saturated solution of NH<sub>4</sub>F in MeOH (ca. 3 mL) was carefully added to quench the reaction (Caution: gas evolution was observed). The reaction mixture was allowed to stir at room temperature for 15 min before diluted with DCM (ca. 10 mL) and water (5mL). The organic phase was separated and the aqueous layer was extracted with DCM (10mL\*2). The combined organic phase was concentrated in *vacuo* and the residue was purified by silica gel chromatography using PE/EA (silica gel, 10:1 to 5:1) with 1% Et<sub>3</sub>N to afford the product.

#### Optimization of Asymmetric Hydroamination Conditions



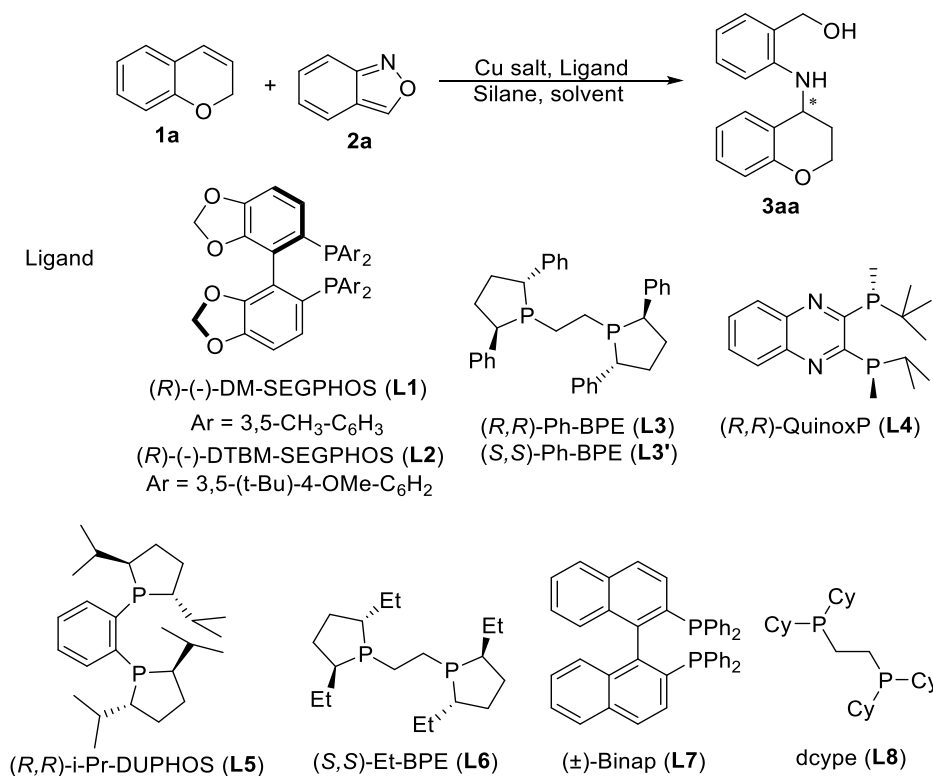

| entry | Cu salt              | Ligand     | solvent  | Silane             | additive | yield (%) | ee (%) |
|-------|----------------------|------------|----------|--------------------|----------|-----------|--------|
| 1     | CuOAc                | <b>L3</b>  | n-hexane | PhSiH <sub>3</sub> | -        | 81        | 98     |
| 2     | CuOAc                | <b>L3'</b> | n-hexane | PhSiH <sub>3</sub> | -        | 78        | -98    |
| 3     | CuOAc                | <b>L1</b>  | n-hexane | PhSiH <sub>3</sub> | -        | NR        | -      |
| 4     | CuOAc                | <b>L2</b>  | n-hexane | PhSiH <sub>3</sub> | -        | 17        | 90     |
| 5     | CuOAc                | <b>L13</b> | n-hexane | PhSiH <sub>3</sub> | -        | 84        | -93    |
| 6     | CuOAc                | <b>L14</b> | n-hexane | PhSiH <sub>3</sub> | -        | 70        | 88     |
| 7     | CuOAc                | <b>L15</b> | n-hexane | PhSiH <sub>3</sub> | -        | 58        | 82     |
| 8     | CuOAc                | <b>L4</b>  | n-hexane | PhSiH <sub>3</sub> | -        | trace     | -      |
| 9     | CuOAc                | <b>L12</b> | n-hexane | PhSiH <sub>3</sub> | -        | 33        | -      |
| 10    | Cu(OAc) <sub>2</sub> | <b>L3</b>  | n-hexane | PhSiH <sub>3</sub> | -        | 29        | 97     |
| 11    | CuTc                 | <b>L3</b>  | n-hexane | PhSiH <sub>3</sub> | -        | 30        | 96     |
| 12    | CuCl                 | <b>L3</b>  | n-hexane | PhSiH <sub>3</sub> | -        | NR        | -      |
| 13    | CuBr                 | <b>L3</b>  | n-hexane | PhSiH <sub>3</sub> | -        | NR        | -      |
| 14    | CuOTf                | <b>L3</b>  | n-hexane | PhSiH <sub>3</sub> | -        | NR        | -      |
| 15    | Cu(TFA) <sub>2</sub> | <b>L3</b>  | n-hexane | PhSiH <sub>3</sub> | -        | NR        | -      |

|    |                                    |           |                 |                                        |                                 |     |    |
|----|------------------------------------|-----------|-----------------|----------------------------------------|---------------------------------|-----|----|
| 16 | Cu(ClO <sub>4</sub> ) <sub>2</sub> | <b>L3</b> | n-hexane        | PhSiH <sub>3</sub>                     | -                               | NR  | -  |
| 17 | CuOAc                              | <b>L3</b> | n-hexane        | Ph <sub>2</sub> MeSiH                  | -                               | NR  | -  |
| 18 | CuOAc                              | <b>L3</b> | n-hexane        | Ph <sub>2</sub> SiH <sub>2</sub>       | -                               | 15  | 98 |
| 19 | CuOAc                              | <b>L3</b> | n-hexane        | (MeO) <sub>3</sub> SiH                 | -                               | 52  | 98 |
| 20 | CuOAc                              | <b>L3</b> | n-hexane        | (EtO) <sub>3</sub> SiH                 | -                               | 73  | 98 |
| 21 | CuOAc                              | <b>L3</b> | n-hexane        | DEMS                                   | -                               | 75  | 98 |
| 22 | CuOAc                              | <b>L3</b> | n-hexane        | PMHS                                   | -                               | 32  | 98 |
| 23 | CuOAc                              | <b>L3</b> | n-hexane        | DMMS                                   | -                               | 50  | 98 |
| 24 | CuOAc                              | <b>L3</b> | n-hexane        | (Me <sub>2</sub> SiH) <sub>2</sub> O   | -                               | 22  | 98 |
| 25 | CuOAc                              | <b>L3</b> | n-hexane        | (Me <sub>3</sub> SiO) <sub>3</sub> SiH | -                               | 41  | 98 |
| 26 | CuOAc                              | <b>L3</b> | n-hexane        | (Me <sub>2</sub> SiHO) <sub>4</sub> Si | -                               | 34  | 98 |
| 27 | CuOAc                              | <b>L3</b> | n-hexane        | PhSiH <sub>3</sub>                     | -                               | 83  | 98 |
| 28 | CuOAc                              | <b>L3</b> | n-hexane        | PhSiH <sub>3</sub>                     | -                               | 9 e | 99 |
| 29 | CuOAc                              | <b>L3</b> | Cyclo<br>hexane | PhSiH <sub>3</sub>                     | -                               | 78  | 97 |
| 30 | CuOAc                              | <b>L3</b> | Toluene         | PhSiH <sub>3</sub>                     | -                               | 91  | 98 |
| 31 | CuOAc                              | <b>L3</b> | P-xylene        | PhSiH <sub>3</sub>                     | -                               | 88  | 98 |
| 32 | CuOAc                              | <b>L3</b> | THF             | PhSiH <sub>3</sub>                     | -                               | 71  | 98 |
| 33 | CuOAc                              | <b>L3</b> | dioxane         | PhSiH <sub>3</sub>                     | -                               | 69  | 98 |
| 34 | CuOAc                              | <b>L3</b> | EA              | PhSiH <sub>3</sub>                     | -                               | 82  | 98 |
| 35 | CuOAc                              | <b>L3</b> | DCE             | PhSiH <sub>3</sub>                     | -                               | 48  | 91 |
| 36 | CuOAc                              | <b>L3</b> | DMF             | PhSiH <sub>3</sub>                     | -                               | 57  | 98 |
| 37 | CuOAc                              | <b>L3</b> | n-hexane        | PhSiH <sub>3</sub>                     | PPh <sub>3</sub>                | 69  | 98 |
| 38 | CuOAc                              | <b>L3</b> | n-hexane        | PhSiH <sub>3</sub>                     | t-BuONa                         | 77  | 98 |
| 39 | CuOAc                              | <b>L3</b> | n-hexane        | PhSiH <sub>3</sub>                     | Cs <sub>2</sub> CO <sub>3</sub> | 65  | 98 |

The effect of temperature

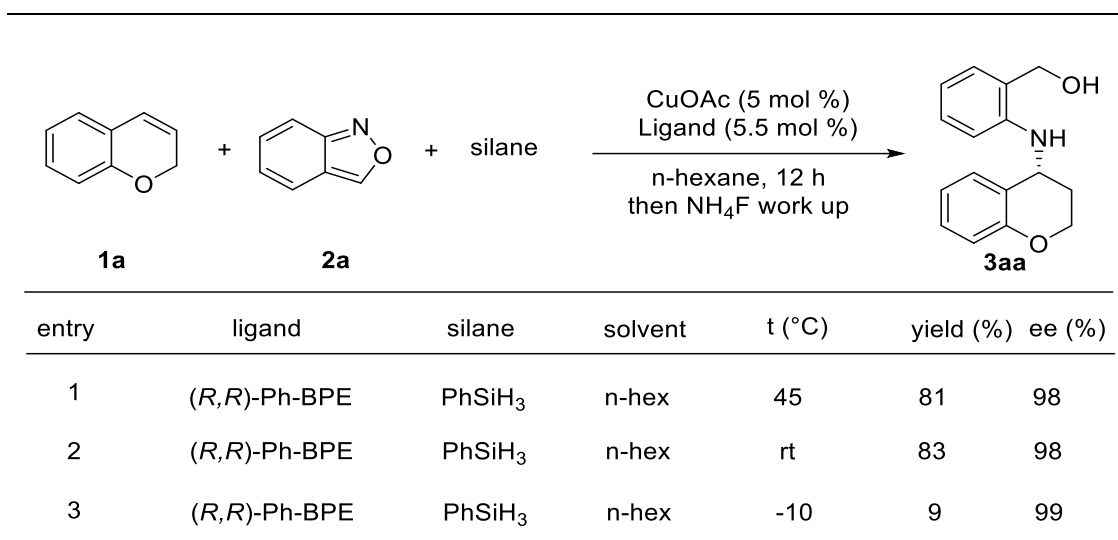

The effect of the ratio between the reagents

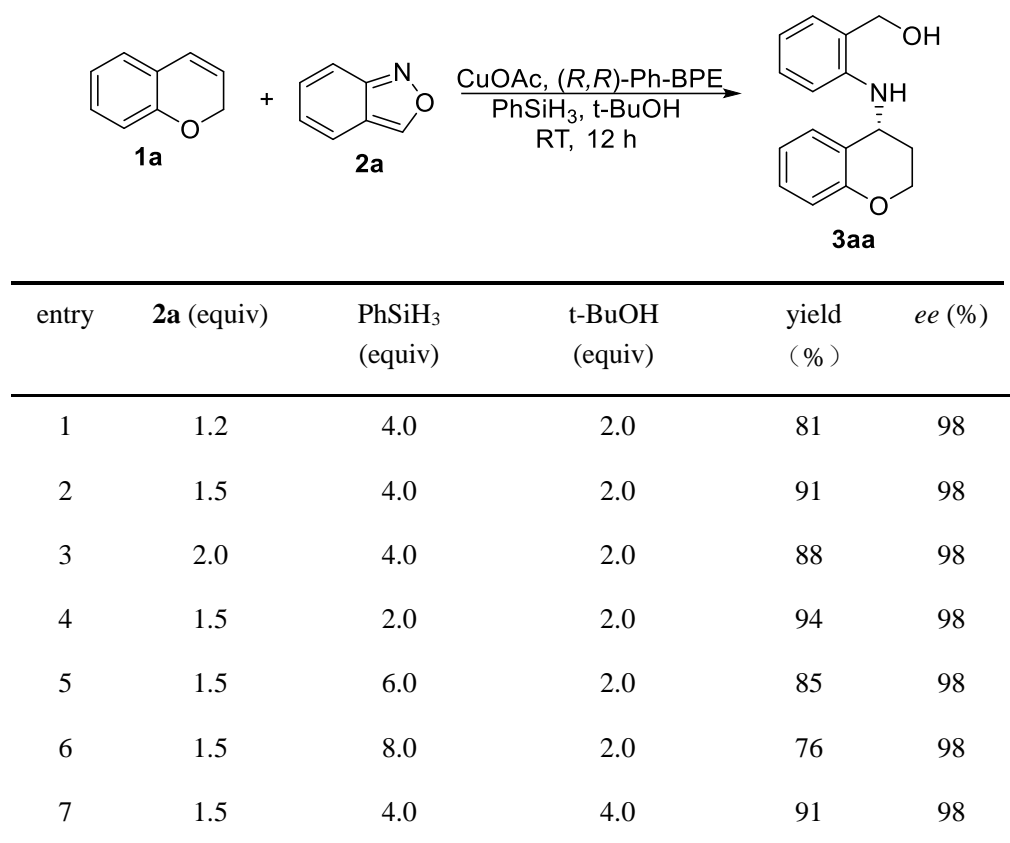

#### 4. Analytic Data for the Products

##### (*R*)-(2-(chroman-4-ylamino)phenyl)methanol (3aa)

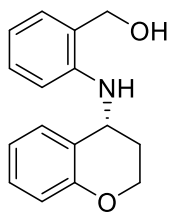

Yellow oil (47.9 mg, 94% yield, 98% *ee*).  $^1\text{H NMR}$  (500 MHz,  $\text{CDCl}_3$ ):  $\delta$  7.33 – 7.22 (m, 2H), 7.22 – 7.15 (m, 1H), 7.08 (m, 1H), 6.86 (m, 3H), 6.70 (t,  $J = 7.3$  Hz, 1H), 5.03 (br s, 1H), 4.66 (t,  $J = 4.2$  Hz, 1H), 4.63 – 4.53 (m, 2H), 4.22 (t,  $J = 5.2$  Hz, 2H), 2.19 – 2.08 (m, 2H), 1.63 (br s, 1H).  $^{13}\text{C NMR}$ : (125 MHz,  $\text{CDCl}_3$ )  $\delta$  155.1, 145.9, 130.2, 129.7, 129.6, 129.1, 124.5, 123.2, 120.7, 117.0, 116.8, 110.6, 64.6, 62.8, 46.4, 27.8.  $[\alpha]_D^{27} = 580.3$  (c 1.0,  $\text{CHCl}_3$ ). The enantiomeric excess was determined by Daicel Chiralcel OJ-3 (0.46 cm x 25 cm), Hexanes / IPA = 75 / 25, 1.0 mL/min,  $\lambda = 254$  nm,  $t_r$  (major) = 15.3 min,  $t_r$  (minor) = 21.6 min. HRMS (ESI)  $m/z$ :  $[\text{M}+\text{H}]^+$  calcd for  $\text{C}_{16}\text{H}_{18}\text{NO}_2$ , 256.1338; found 256.1331.

### **(R)-2-((6-methoxychroman-4-yl)amino)phenylmethanol (3ba)**

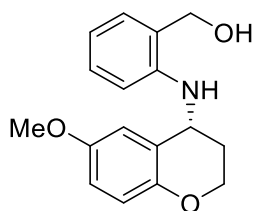

Yellow oil (48.5 mg, 85% yield, 98% *ee*).  $^1\text{H NMR}$  (500 MHz,  $\text{CDCl}_3$ ):  $\delta$  7.27 – 7.22 (m, 1H), 7.18 – 7.03 (m, 1H), 6.84 – 6.79 (m, 2H), 6.79 – 6.73 (m, 2H), 6.71 – 6.66 (m, 1H), 4.64 – 4.58 (m, 1H), 4.61 – 4.51 (m, 2H), 4.19 – 4.12 (m, 2H), 3.68 (s, 3H), 2.14 – 2.04 (m, 2H).  $^{13}\text{C NMR}$ : (125 MHz,  $\text{CDCl}_3$ )  $\delta$  153.6, 149.1, 145.9, 129.7, 129.6, 124.5, 123.5, 117.8, 116.8, 116.0, 113.8, 110.6, 64.7, 62.8, 55.8, 46.7, 28.0.  $[\alpha]_D^{28} = 274.5$  (c 2.0,  $\text{CHCl}_3$ ). The enantiomeric excess was determined by Daicel Chiralcel OJ-3 (0.46 cm x 25 cm), Hexanes / IPA = 75 / 25, 1.0 mL/min,  $\lambda = 254$  nm,  $t_r$  (minor) = 10.1 min,  $t_r$  (major) = 13.5 min. HRMS (ESI)  $m/z$ :  $[\text{M}+\text{H}]^+$  calcd for  $\text{C}_{17}\text{H}_{20}\text{NO}_3$ , 286.1443; found 286.1436.

### **(R)-2-((6-methylchroman-4-yl)amino)phenylmethanol (3ca)**

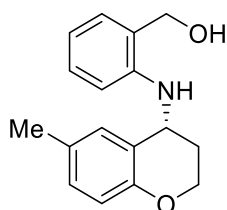

Yellow oil (49.0 mg, 91% yield, 98% *ee*). <sup>1</sup>H NMR (500 MHz, CHCl<sub>3</sub>): δ 7.28 – 7.23 (m, 1H), 7.12 – 7.06 (m, 2H), 7.00 – 6.96 (m, 1H), 6.84 – 6.80 (m, 1H), 6.77 – 6.73 (m, 1H), 6.72 – 6.67 (m, 1H), 5.02 (br s, 1H), 4.64 – 4.53 (m, 3H), 4.22 – 4.14 (m, 2H), 2.24 (s, 3H), 2.15 – 2.08 (m, 2H). <sup>13</sup>C NMR: (125 MHz, CDCl<sub>3</sub>) δ 152.9, 145.8, 130.4, 129.9, 129.9, 129.7, 129.6, 124.5, 122.8, 116.8, 116.8, 110.6, 64.6, 62.7, 46.4, 27.9, 20.6. [α]<sup>26</sup><sub>D</sub> = 602.8 (c 1.0, CHCl<sub>3</sub>). The enantiomeric excess was determined by Daicel Chiralcel OJ-3 (0.46 cm x 25 cm), Hexanes / IPA = 85 / 15, 1.0 mL/min, λ = 254 nm, t<sub>r</sub> (minor) = 10.6 min, t<sub>r</sub> (major) = 13.1 min. HRMS (ESI) m/z: [M+H]<sup>+</sup> calcd for C<sub>17</sub>H<sub>20</sub>NO<sub>2</sub>, 270.1494; found 270.1489.

**(R)-2-((6-bromochroman-4-yl)amino)phenylmethanol (3da)**

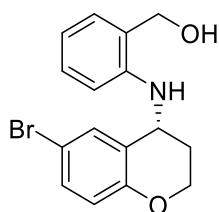

Yellow oil (64.6 mg, 97% yield, 96% *ee*). <sup>1</sup>H NMR (500 MHz, CHCl<sub>3</sub>): δ 7.44 – 7.39 (m, 1H), 7.27 – 7.22 (m, 2H), 7.10 – 7.05 (m, 1H), 6.82 – 6.77 (m, 1H), 6.76 – 6.67 (m, 2H), 5.05 (br s, 1H), 4.65 – 4.52 (m, 3H), 4.25 – 4.15 (m, 2H), 2.15 – 2.05 (m, 2H). <sup>13</sup>C NMR (125 MHz, CDCl<sub>3</sub>): δ 154.2, 145.7, 132.6, 132.0, 129.7, 129.6, 125.3, 124.6, 119.0, 117.1, 112.6, 110.6, 64.7, 63.0, 46.3, 27.6. [α]<sup>27</sup><sub>D</sub> = 596.7 (c 1.0, CHCl<sub>3</sub>). The enantiomeric excess was determined by Daicel Chiralcel OJ-3 (0.46 cm x 25 cm), Hexanes / IPA = 90 / 10, 1.0 mL/min, λ = 254 nm, t<sub>r</sub> (minor) = 18.4 min, t<sub>r</sub> (major) = 21.5 min. HRMS (ESI) m/z: [M+H]<sup>+</sup> calcd for C<sub>16</sub>H<sub>17</sub>BrNO<sub>2</sub>, 334.0443; found 334.0436.

**(R)-2-((6-chlorochroman-4-yl)amino)phenylmethanol (3ea)**

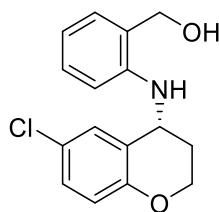

Yellow oil (52.0 mg, 90% yield, 97% *ee*). <sup>1</sup>H NMR: (500 MHz, CHCl<sub>3</sub>) δ 7.31 – 7.22 (m, 2H), 7.14 – 7.10 (m, 1H), 7.10 – 7.05 (m, 1H), 6.83 – 6.75 (m, 2H), 6.74 – 6.67 (m, 1H), 5.06 (br s, 1H), 4.67 – 4.53 (m, 3H), 4.26 – 4.16 (m, 2H), 2.17 – 2.06 (m, 2H). <sup>13</sup>C NMR (125 MHz, CDCl<sub>3</sub>): δ 153.7, 145.7, 129.7,

129.6, 129.6, 129.2, 125.4, 124.8, 124.6, 118.5, 117.1, 110.6, 64.7, 63.1, 46.3, 27.6.  $[\alpha]_D^{28} = 269.3$  (c 2.0,  $\text{CHCl}_3$ ). The enantiomeric excess was determined by Daicel Chiralcel OJ-3 (0.46 cm x 25 cm), Hexanes / IPA = 85 / 15, 1.0 mL/min,  $\lambda = 254$  nm,  $t_r$  (minor) = 11.9 min,  $t_r$  (major) = 13.8 min. HRMS (ESI) m/z:  $[\text{M}+\text{H}]^+$  calcd for  $\text{C}_{16}\text{H}_{17}\text{ClNO}_2$ , 290.0948; found 290.0938.

**(R)-(2-((6-fluorochroman-4-yl)amino)phenyl)methanol (3fa)**

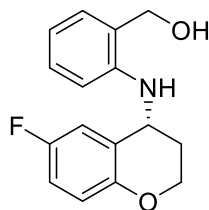

Yellow oil (44.2 mg, 81% yield, 97% *ee*).  $^1\text{H}$  NMR (500 MHz,  $\text{CDCl}_3$ ):  $\delta$  7.30 - 7.22(m, 1H), 7.12 - 7.07 (m, 1H), 7.05 - 6.99 (m, 1H), 6.92 - 6.85 (m, 1H), 6.84 - 6.76 (m, 2H), 6.75 - 6.68 (m, 1H), 5.12 (br s, 1H), 4.67 - 4.57 (m, 3H), 4.25 - 4.18 (m, 2H), 2.17 - 2.08 (m, 2H).  $^{13}\text{C}$  NMR (125 MHz,  $\text{CDCl}_3$ ):  $\delta$  156.9 (d,  $J_{\text{C-F}} = 238.5$  Hz), 151.1 (d,  $J_{\text{C-F}} = 1.9$  Hz), 145.8, 129.7, 129.6, 124.6, 124.3 (d,  $J_{\text{C-F}} = 6.9$  Hz), 118.0 (d,  $J_{\text{C-F}} = 8.0$  Hz), 117.1, 116.1 (d,  $J_{\text{C-F}} = 23.3$  Hz), 115.5 (d,  $J_{\text{C-F}} = 23.0$  Hz), 110.6, 64.8, 63.1, 46.6, 27.9.  $^{19}\text{F}$  NMR: (376 MHz,  $\text{CDCl}_3$ )  $\delta$  -123.40.  $[\alpha]_D = 578.2$  (c 1.0,  $\text{CHCl}_3$ ). The enantiomeric excess was determined by Daicel Chiralcel IC (0.46 cm x 25 cm), Hexanes / IPA = 90 / 10, 1.0 mL/min,  $\lambda = 254$  nm,  $t_r$  (major) = 5.6 min,  $t_r$  (minor) = 6.7 min. HRMS (ESI) m/z:  $[\text{M}+\text{H}]^+$  calcd for  $\text{C}_{16}\text{H}_{17}\text{FNO}_2$ , 274.1243; found 274.1233.

**(R)-(2-((6-phenylchroman-4-yl)amino)phenyl)methanol (3ga)**

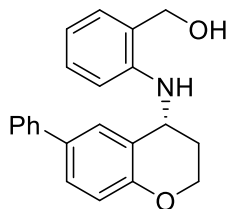

Colorless oil (60.9 mg, 92% yield, 97% *ee*).  $^1\text{H}$  NMR (500 MHz,  $\text{CHCl}_3$ ):  $\delta$  7.53 - 7.51 (m, 1H), 7.49 - 7.45 (m, 2H), 7.41 - 7.38 (m, 1H), 7.34 - 7.31 (m, 2H), 7.25 - 7.21 (m, 2H), 7.02 - 6.99 (m, 1H), 6.93 - 6.87 (m, 1H), 6.84 - 6.78 (m, 1H), 6.70 - 6.63 (m, 1H), 5.07 (d,  $J = 6.5$  Hz, 1H), 4.69 - 4.63 (m, 1H), 4.54 - 4.45 (m, 2H), 4.23 - 4.17 (m, 2H), 2.15 - 2.08 (m, 2H).  $^{13}\text{C}$  NMR (125 MHz,  $\text{CDCl}_3$ ):  $\delta$  154.8,

145.9, 140.7, 133.9, 129.8, 129.7, 128.8, 128.8, 127.9, 126.8, 126.7, 124.6, 123.6, 117.6, 117.0, 110.7, 64.6, 63.0, 46.6, 27.9.  $[\alpha]_{\text{D}}^{28} = 217.7$  (c 2.0,  $\text{CHCl}_3$ ). The enantiomeric excess was determined by Daicel Chiralcel IC (0.46 cm x 25 cm), Hexanes / IPA = 90 / 10, 1.0 mL/min,  $\lambda = 254$  nm,  $t_{\text{r}}$  (major) = 6.7 min,  $t_{\text{r}}$  (minor) = 7.3 min. HRMS (ESI)  $m/z$ :  $[\text{M}+\text{H}]^+$  calcd for  $\text{C}_{22}\text{H}_{22}\text{NO}_2$ , 332.1651; found 332.1638.

**(R)-2-(((6,8-dimethylchroman-4-yl)amino)phenyl)methanol (3ha)**

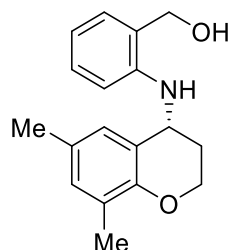

Yellow oil (50.4 mg, 89% yield, 95% *ee*).  $^1\text{H}$  NMR: (500 MHz,  $\text{CDCl}_3$ )  $\delta$  7.30 – 7.24 (m, 1H), 7.11 – 7.06 (m, 1H), 6.87 – 6.82 (m, 1H), 6.72 – 6.66 (m, 1H), 6.62 – 6.53 (m, 2H), 4.89 (br s, 1H), 4.61 – 4.51 (m, 3H), 4.25 – 4.12 (m, 2H), 2.26 (s, 3H), 2.22 – 2.14 (m, 4H), 2.01 – 1.92 (m, 1H).  $^{13}\text{C}$  NMR: (125 MHz,  $\text{CDCl}_3$ )  $\delta$  155.0, 145.5, 138.9, 138.8, 129.7, 129.6, 124.2, 123.6, 117.9, 116.5, 115.1, 110.0, 64.6, 61.5, 43.5, 27.3, 21.1, 18.1.  $[\alpha]_{\text{D}}^{27} = 601.6$  (c 1.0,  $\text{CHCl}_3$ ). The enantiomeric excess was determined by Daicel Chiralcel OJ-3 (0.46 cm x 25 cm), Hexanes / IPA = 90 / 10, 1.0 mL/min,  $\lambda = 254$  nm,  $t_{\text{r}}$  (minor) = 11.9 min,  $t_{\text{r}}$  (major) = 13.6 min. HRMS (ESI)  $m/z$ :  $[\text{M}+\text{H}]^+$  calcd for  $\text{C}_{18}\text{H}_{22}\text{NO}_2$ , 284.1651; found 284.1643.

**(R)-2-(((3,4-dihydro-2H-benzo[*h*]chromen-4-yl)amino)phenyl)methanol (3ia)**

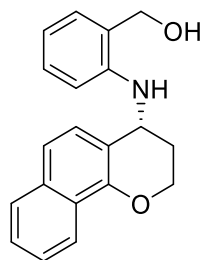

Yellow oil (52.5 mg, 86% yield, 96% *ee*).  $^1\text{H}$  NMR (500 MHz,  $\text{CHCl}_3$ ):  $\delta$  8.25 – 8.18 (m, 1H), 7.74 – 7.71 (m, 1H), 7.49 – 7.44 (m, 2H), 7.35 – 7.29 (m, 2H), 7.28 – 7.24 (m, 1H), 7.07 – 7.02 (m, 1H), 6.88 – 6.82 (m, 1H), 6.72 – 6.66 (m, 1H), 5.11 ((br s, 1H)), 4.69 (s, 1H), 4.56 – 4.48 (m, 2H), 4.46 – 4.41 (m, 1H), 4.35 – 4.29 (m, 1H), 2.25 – 2.14 (m, 2H).  $^{13}\text{C}$  NMR (125 MHz,  $\text{CDCl}_3$ ):  $\delta$  150.6, 145.8, 134.1,

129.7, 129.6, 127.6, 127.5, 126.6, 125.5, 125.2, 124.5, 122.0, 120.2, 116.8, 116.4, 110.6, 64.6, 63.0, 46.3, 27.8.  $[\alpha]_D^{27} = 680.6$  (c 1.0,  $\text{CHCl}_3$ ). The enantiomeric excess was determined by Daicel Chiralcel IA (0.46 cm x 25 cm), Hexanes / IPA = 90 / 10, 1.0 mL/min,  $\lambda = 254$  nm,  $t_r$  (major) = 9.1 min,  $t_r$  (minor) = 10.1 min. HRMS (ESI) m/z:  $[\text{M}+\text{H}]^+$  calcd for  $\text{C}_{20}\text{H}_{20}\text{NO}_2$ , 306.1494; found 306.1491.

**(R)-(2-(((6,6-dimethyl-7,8-dihydro-6H-[1,3]dioxolo[4,5-g]chromen-8-yl)amino)phenyl)methanol (3ja)**

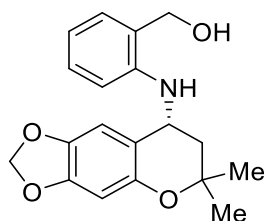

White solid (43.8 mg, 67% yield, 87% *ee*). M.p. 99-102°C.  $^1\text{H}$  NMR: (500 MHz,  $\text{CDCl}_3$ )  $\delta$  7.26 – 7.21 (m, 1H), 7.11 – 7.07 (m, 1H), 6.89 (s, 1H), 6.81 – 6.76 (m, 1H), 6.70 – 6.65 (m, 1H), 6.36 (s, 1H), 5.89 – 5.83 (m, 2H), 4.94 (br s, 1H), 4.71 – 4.59 (m, 3H), 2.23 (dd,  $J = 13.5, 5.9$  Hz, 1H), 1.79 (dd,  $J = 13.5, 9.5$  Hz, 1H), 1.40 (s, 3H), 1.35 (s, 3H).  $^{13}\text{C}$  NMR: (125 MHz,  $\text{CDCl}_3$ )  $\delta$  148.7, 147.7, 146.8, 141.6, 129.8, 129.6, 124.4, 116.5, 115.0, 110.5, 106.5, 100.9, 98.9, 75.2, 64.9, 46.1, 39.9, 29.0, 25.5.  $[\alpha]_D^{27} = 581.2$  (c 1.0,  $\text{CHCl}_3$ ). The enantiomeric excess was determined by Daicel Chiralcel OJ-3 (0.46 cm x 25 cm), Hexanes / IPA = 75 / 25, 1.0 mL/min,  $\lambda = 254$  nm,  $t_r$  (minor) = 6.2 min,  $t_r$  (major) = 7.3 min. HRMS (ESI) m/z:  $[\text{M}+\text{H}]^+$  calcd for  $\text{C}_{19}\text{H}_{22}\text{NO}_4$ , 328.1549; found 328.1541.

**(2-(((2S,4R)-2-phenylchroman-4-yl)amino)phenyl)methanol (3ka)**

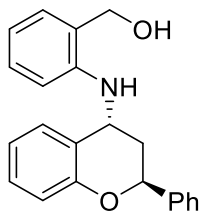

Yellow oil (32.5 mg, 49% yield, 95% *ee*).  $^1\text{H}$  NMR: (500 MHz,  $\text{CHCl}_3$ )  $\delta$  7.46 – 7.30 (m, 6H), 7.29 – 7.22 (m, 2H), 7.15 – 7.11 (m, 1H), 7.02 – 6.94 (m, 2H), 6.87 – 6.81 (m, 1H), 6.76 – 6.70 (m, 1H), 5.33 – 5.05 (m, 2H), 4.74 – 4.60 (m, 3H), 2.47 – 2.41 (m, 1H), 2.22 – 2.14 (m, 1H).  $^{13}\text{C}$  NMR: (125 MHz,  $\text{CDCl}_3$ )  $\delta$  155.3, 145.7, 140.9, 130.5, 129.7, 129.6, 129.4, 128.6, 128.0, 126.4, 124.6, 122.4, 121.0, 117.4,



---

117.0, 110.6, 73.9, 64.7, 47.0, 35.3.  $[\alpha]_D^{26} = 602.8$  (c 1.0,  $\text{CHCl}_3$ ). The enantiomeric excess was determined by Daicel Chiralcel IC (0.46 cm x 25 cm), Hexanes / IPA = 90 / 10, 1.0 mL/min,  $\lambda = 254$  nm,  $t_r$  (major) = 4.9 min,  $t_r$  (minor) = 6.1 min.. HRMS (ESI) m/z:  $[\text{M}+\text{H}]^+$  calcd for  $\text{C}_{22}\text{H}_{22}\text{NO}_2$ , 332.1651; found 332.1641.

**(2-(((2R,4R)-2-phenylchroman-4-yl)amino)phenyl)methanol (3ka')**

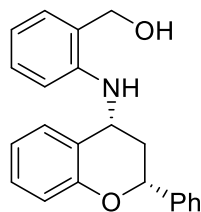

Yellow oil (17.9 mg, 27% yield, 99% *ee*).  $^1\text{H}$  NMR: (500 MHz,  $\text{CHCl}_3$ )  $\delta$  7.54 – 7.50 (m, 1H), 7.48 – 7.43 (m, 2H), 7.41 – 7.32 (m, 3H), 7.25 – 7.18 (m, 2H), 7.12 – 7.08 (m, 1H), 6.97 – 6.91 (m, 2H), 6.87 – 6.83 (m, 1H), 6.72 – 6.66 (m, 1H), 5.31 – 5.25 (m, 1H), 5.12 – 4.93 (m, 2H), 4.71 – 4.57 (m, 2H), 2.71 – 2.62 (m, 1H), 2.14 – 2.05 (m, 1H).  $^{13}\text{C}$  NMR: (125 MHz,  $\text{CDCl}_3$ )  $\delta$  155.1, 146.9, 140.8, 129.8, 129.5, 128.8, 128.6, 128.2, 127.3, 126.1, 124.7, 124.4, 121.0, 117.0, 116.7, 110.8, 77.6, 64.8, 48.8, 37.3.  $[\alpha]_D^{27} = 501.1$  (c 1.0,  $\text{CHCl}_3$ ). The enantiomeric excess was determined by Daicel Chiralcel IC (0.46 cm x 25 cm), Hexanes / IPA = 95 / 5, 1.0 mL/min,  $\lambda = 254$  nm,  $t_r$  (major) = 8,6 min,  $t_r$  (minor) = 10.0 min.. HRMS (ESI) m/z:  $[\text{M}+\text{H}]^+$  calcd for  $\text{C}_{22}\text{H}_{22}\text{NO}_2$ , 332.1651; found 332.1641.

**(2-(((3S,4R)-3-methylchroman-4-yl)amino)phenyl)methanol (3la)**

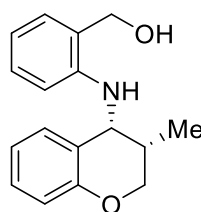

Yellow oil (10.2 mg, 19% yield, 99% *ee*, > 20:1 dr).  $^1\text{H}$  NMR (500 MHz,  $\text{CDCl}_3$ ):  $\delta$  7.29 – 7.22 (m, 2H), 7.21 – 7.15 (m, 1H), 7.11 – 7.06 (m, 1H), 6.91 – 6.83 (m, 2H), 6.77 – 6.72 (m, 1H), 6.72 – 6.66 (m, 1H),, 5.10 (br s, 1H), 4.63 – 4.57 (m, 2H), 4.27 – 4.20 (m, 2H), 3.99 – 3.93 (m, 1H), 2.27 – 2.19 (m, 1H), 1.09 (d, J = 7.2 Hz, 3H).  $^{13}\text{C}$  NMR: (125 MHz,  $\text{CDCl}_3$ )  $\delta$  155.0, 151.6, 139.8, 130.1, 129.0, 126.5, 123.5, 120.6, 117.0, 116.0, 114.2, 112.4, 64.4, 62.7, 55.9, 47.1, 27.8.  $[\alpha]_D^{27} = 661.7$  (c 1.0,  $\text{CHCl}_3$ ). The

enantiomeric excess was determined by Daicel Chiralcel OJ-3 (0.46 cm x 25 cm), Hexanes / IPA = 80 / 20, 1.0 mL/min,  $\lambda = 254$  nm,  $t_r$  (major) = 14.8 min,  $t_r$  (minor) = 35.7 min. HRMS (ESI)  $m/z$ :  $[M+H]^+$  calcd for  $C_{17}H_{20}NO_2$ , 270.1494; found 270.1488.

**(2-(((3*S*,4*R*)-3-phenylchroman-4-yl)amino)phenyl)methanol (3ma)**

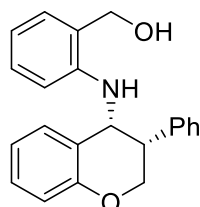

Yellow oil (32.1 mg, 48% yield, 98% *ee*, > 20:1 *dr*).  $^1H$  NMR (500 MHz,  $CDCl_3$ ):  $\delta$  7.35 – 7.31 (m, 1H), 7.29 – 7.15 (m, 7H), 7.05 – 7.01 (m, 1H), 6.94 – 6.88 (m, 2H), 6.72 – 6.69 (m, 1H), 6.69 – 6.64 (m, 1H), 5.20 (br s, 1H), 4.78 – 4.71 (m, 1H), 4.55 – 4.46 (m, 2H), 4.45 – 4.40 (m, 1H), 4.32 – 4.27 (m, 1H), 3.37 – 3.30 (m, 1H).  $^{13}C$  NMR: (125 MHz,  $CDCl_3$ )  $\delta$  154.8, 146.2, 139.9, 134.2, 130.0, 129.7, 129.5, 129.1, 128.8, 128.0, 127.2, 124.3, 123.5, 121.2, 116.9, 111.1, 68.1, 64.7, 52.6, 43.5.  $[\alpha]_D^{27} = 700.0$  (c 1.0,  $CHCl_3$ ). The enantiomeric excess was determined by Daicel Chiralcel IB (0.46 cm x 25 cm), Hexanes / IPA = 95 / 5, 1.0 mL/min,  $\lambda = 254$  nm,  $t_r$  (minor) = 11.3 min,  $t_r$  (major) = 15.0 min. HRMS (ESI)  $m/z$ :  $[M+H]^+$  calcd for  $C_{22}H_{22}NO_2$ , 332.1651; found 332.1641.

**(*R*)-(2-(chroman-4-ylamino)-5-methoxyphenyl)methanol (3ab)**

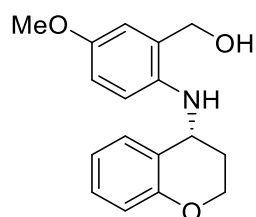

Light yellow solid (34.2 mg, 60% yield, 97% *ee*). M.p. 84-86 °C.  $^1H$  NMR: (500 MHz,  $CDCl_3$ )  $\delta$  7.32 – 7.26 (m, 1H), 7.22 – 7.15 (m, 1H), 6.94 – 6.71 (m, 5H), 4.62 – 4.53 (m, 3H), 4.27 – 4.20 (m, 2H), 3.77 (s, 3H), 2.16 – 2.09 (m, 2H).  $^{13}C$  NMR: (125 MHz,  $CDCl_3$ )  $\delta$  154.5, 146.3, 130.7, 129.7, 129.6, 129.0, 124.2, 122.4, 120.9, 116.8, 116.7, 110.5, 67.9, 64.7, 53.2, 31.6, 14.5.  $[\alpha]_D^{27} = 594.8$  (c 1.0,  $CHCl_3$ ). The enantiomeric excess was determined by Daicel Chiralcel OD-H (0.46 cm x 25 cm), Hexanes / IPA = 95 / 5, 1.0 mL/min,  $\lambda = 254$  nm,  $t_r$  (minor) = 21.1 min,  $t_r$  (major) = 24.4 min. HRMS (ESI)  $m/z$ :  $[M+H]^+$

calcd for C<sub>17</sub>H<sub>20</sub>NO<sub>3</sub>, 286.1443; found 286.1436.

**(R)-4-(chroman-4-ylamino)-3-(hydroxymethyl)phenyl acetate (3ac)**

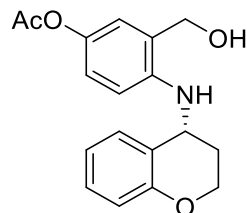

Light yellow solid (37.6 mg, 60% yield, 95% *ee*). M.p. 137-139 °C. <sup>1</sup>H NMR (500 MHz, CDCl<sub>3</sub>): δ 7.30 – 7.26 (m, 1H), 7.22 – 7.16 (m, 1H), 6.99 – 6.94 (m, 1H), 6.94 – 6.77 (m, 4H), 4.99 (br s, 1H), 4.66 – 4.54 (m, 3H), 4.29 – 4.19 (m, 2H), 2.28 (s, 3H), 2.17 – 2.11 (m, 2H). <sup>13</sup>C NMR (125 MHz, CDCl<sub>3</sub>): δ 170.4, 155.0, 143.7, 141.2, 130.0, 129.2, 125.2, 123.1, 122.5, 122.0, 120.7, 117.1, 110.9, 64.2, 62.7, 46.7, 27.8, 21.0. [α]<sub>D</sub><sup>26</sup> = 532.9 (c 1.0, CHCl<sub>3</sub>). The enantiomeric excess was determined by Daicel Chiralcel IA (0.46 cm x 25 cm), Hexanes / IPA = 90 / 10, 1.0 mL/min, λ = 254 nm, t<sub>r</sub> (minor) = 13.6 min, t<sub>r</sub> (major) = 18.6 min. HRMS (ESI) m/z: [M+H]<sup>+</sup> calcd for C<sub>18</sub>H<sub>20</sub>NO<sub>4</sub>, 314.1392; found 314.1381.

**(R)-2-(chroman-4-ylamino)-5-fluorophenylmethanol (3ad)**

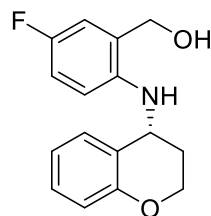

Colorless oil (47.5 mg, 87% yield, 97% *ee*). <sup>1</sup>H NMR (500 MHz, CDCl<sub>3</sub>): δ 7.32 – 7.25 (m, 1H), 7.22 – 7.15 (m, 1H), 6.98 – 6.93 (m, 1H), 6.93 – 6.82 (m, 3H), 6.78 – 6.71 (m, 1H), 4.61 – 4.51 (m, 3H), 4.27 – 4.19 (m, 2H), 2.12 (m, 2H). <sup>13</sup>C NMR (125 MHz, CDCl<sub>3</sub>): δ 155.3 (d, J<sub>C-F</sub> = 190.0 Hz), 155.0, 142.0 (d, J<sub>C-F</sub> = 2.1 Hz), 130.1, 129.2, 126.0 (d, J<sub>C-F</sub> = 6.0 Hz), 123.1, 120.7, 117.1, 116.2 (d, J<sub>C-F</sub> = 22.7 Hz), 115.3 (d, J<sub>C-F</sub> = 21.7 Hz), 111.6 (d, J<sub>C-F</sub> = 7.3 Hz), 63.9 (d, J<sub>C-F</sub> = 1.6 Hz), 62.7, 46.9, 27.7. <sup>19</sup>F NMR: (376 MHz, CDCl<sub>3</sub>) δ -128.25. [α]<sub>D</sub><sup>27</sup> = 583.6 (c 1.0, CHCl<sub>3</sub>). The enantiomeric excess was determined by Daicel Chiralcel OJ-3 (0.46 cm x 25 cm), Hexanes / IPA = 75 / 25, 1.0 mL/min, λ = 254 nm, t<sub>r</sub> (major) = 16.5 min, t<sub>r</sub> (minor) = 30.5 min. HRMS (ESI) m/z: [M+H]<sup>+</sup> calcd for C<sub>16</sub>H<sub>17</sub>FNO<sub>2</sub>, 274.1243; found 274.1237.

---

**(R)-(5-chloro-2-(chroman-4-ylamino)phenyl)methanol (3ae)**

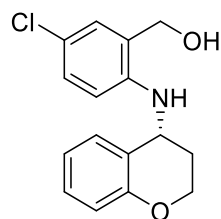

Yellow oil (55.5 mg, 96% yield, 98% *ee*). <sup>1</sup>H NMR: (500 MHz, CDCl<sub>3</sub>) δ 7.30 – 7.26 (m, 1H), 7.23 – 7.17 (m, 2H), 7.10 – 7.05 (m, 1H), 6.94 – 6.84 (m, 2H), 6.77 – 6.73 (m, 1H), 5.03 (d, *J* = 6.4 Hz, 1H), 4.65 – 4.59 (m, 2H), 4.58 – 4.50 (m, 1H), 4.28 – 4.18 (m, 2H), 2.17 – 2.08 (m, 2H). <sup>13</sup>C NMR: (125 MHz, CDCl<sub>3</sub>) δ 155.0, 144.4, 130.0, 129.3, 129.2, 129.1, 126.0, 122.9, 121.3, 120.8, 117.1, 111.8, 64.0, 62.7, 46.6, 27.7. [ $\alpha$ ]<sub>D</sub><sup>26</sup> = 576.8 (c 1.0, CHCl<sub>3</sub>). The enantiomeric excess was determined by Daicel Chiralcel IC (0.46 cm x 25 cm), Hexanes / IPA = 95 / 5, 1.0 mL/min,  $\lambda$  = 254 nm, *t*<sub>r</sub> (major) = 10.0 min, *t*<sub>r</sub> (minor) = 12.0 min. HRMS (ESI) *m/z*: [M+H]<sup>+</sup> calcd for C<sub>16</sub>H<sub>17</sub>ClNO<sub>2</sub>, 290.0948; found 290.0938.

**(R)-(5-bromo-2-(chroman-4-ylamino)phenyl)methanol (3af)**

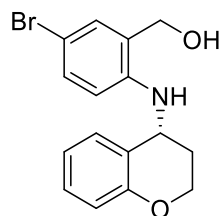

Yellow oil (57.3 mg, 86% yield, 99% *ee*). <sup>1</sup>H NMR: (500 MHz, CDCl<sub>3</sub>) δ 7.30 – 7.26 (m, 1H), 7.23 – 7.17 (m, 1H), 7.11 – 7.05 (m, 1H), 6.97 – 6.85 (m, 3H), 6.80 – 6.75 (m, 1H), 5.27 (br s, 1H), 4.94 – 4.79 (m, 2H), 4.67 – 4.60 (m, 1H), 4.29 – 4.18 (m, 2H), 2.20 – 2.09 (m, 2H). <sup>13</sup>C NMR: (125 MHz, CDCl<sub>3</sub>) δ 155.0, 147.5, 130.4, 130.0, 129.3, 125.1, 123.1, 122.8, 121.2, 120.8, 117.2, 110.0, 62.8, 62.7, 46.6, 27.7. [ $\alpha$ ]<sub>D</sub><sup>27</sup> = 571.3 (c 1.0, CHCl<sub>3</sub>). The enantiomeric excess was determined by Daicel Chiralcel OJ-3 (0.46 cm x 25 cm), Hexanes / IPA = 75 / 25, 1.0 mL/min,  $\lambda$  = 254 nm, *t*<sub>r</sub> (minor) = 11.0 min, *t*<sub>r</sub> (major) = 13.4 min. HRMS (ESI) *m/z*: [M+H]<sup>+</sup> calcd for C<sub>16</sub>H<sub>17</sub>BrNO<sub>2</sub>, 334.0443; found 334.0436.

**(R)-(2-(chroman-4-ylamino)-4-fluorophenyl)methanol (3ag)**

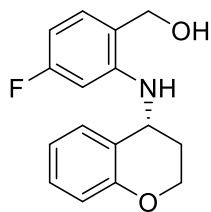

Yellow oil (50.2 mg, 92% yield, 98% *ee*).  $^1\text{H}$  NMR: (500 MHz,  $\text{CDCl}_3$ )  $\delta$  7.31 – 7.27 (m, 1H), 7.23 – 7.17 (m, 1H), 7.05 – 6.99 (m, 1H), 6.94 – 6.85 (m, 2H), 6.55 – 6.49 (m, 1H), 6.41 – 6.34 (m, 1H), 5.23 (br s, 1H), 4.61 – 4.52 (m, 3H), 4.29 – 4.19 (m, 2H), 2.20 – 2.10 (m, 2H).  $^{13}\text{C}$  NMR: (125 MHz,  $\text{CDCl}_3$ )  $\delta$  164.4 (d,  $J = 243.5$  Hz), 155.1, 147.6 (d,  $J = 10.9$  Hz), 130.7 (d,  $J = 10.5$  Hz), 123.0, 129.3, 122.7, 120.8, 120.2, 120.2, 117.2, 102.6 (d,  $J = 21.6$  Hz), 98.0 (d,  $J = 26.3$  Hz), 64.0, 62.7, 46.6, 27.7.  $[\alpha]_D^{27} = 584.2$  (c 1.0,  $\text{CHCl}_3$ ). The enantiomeric excess was determined by Daicel Chiralcel OJ-3 (0.46 cm x 25 cm), Hexanes / IPA = 75 / 25, 1.0 mL/min,  $\lambda = 254$  nm,  $t_r$  (major) = 10.1 min,  $t_r$  (minor) = 13.1 min. HRMS (ESI)  $m/z$ :  $[\text{M}+\text{H}]^+$  calcd for  $\text{C}_{16}\text{H}_{17}\text{FNO}_2$ , 274.1243; found 274.1237.

### **(R)-2-(4-chlorophenyl)-N-(chroman-4-yl)ethan-1-amine (3ah)**

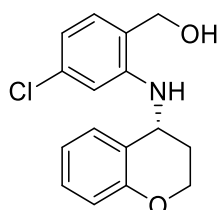

Yellow oil (45.1 mg, 78% yield, 99% *ee*).  $^1\text{H}$  NMR: (500 MHz,  $\text{CDCl}_3$ )  $\delta$  7.29 – 7.26 (m, 1H), 7.23 – 7.17 (m, 1H), 7.02 – 6.97 (m, 1H), 6.94 – 6.85 (m, 2H), 6.81 – 6.77 (m, 1H), 6.69 – 6.63 (m, 1H), 5.19 (d,  $J = 6.5$  Hz, 1H), 4.64 – 4.53 (m, 3H), 4.30 – 4.18 (m, 2H), 2.20 – 2.09 (m, 2H).  $^{13}\text{C}$  NMR: (125 MHz,  $\text{CDCl}_3$ )  $\delta$  155.0, 146.9, 135.4, 130.4, 130.0, 129.3, 122.7, 122.6, 120.8, 117.2, 116.4, 110.5, 64.1, 62.7, 46.4, 27.7.  $[\alpha]_D^{27} = 289.6$  (c 2.0,  $\text{CHCl}_3$ ). The enantiomeric excess was determined by Daicel Chiralcel OJ-3 (0.46 cm x 25 cm), Hexanes / IPA = 75 / 25, 1.0 mL/min,  $\lambda = 254$  nm,  $t_r$  (major) = 10.6 min,  $t_r$  (minor) = 13.1 min. HRMS (ESI)  $m/z$ :  $[\text{M}+\text{H}]^+$  calcd for  $\text{C}_{16}\text{H}_{17}\text{ClNO}_2$ , 290.0948; found 290.0938.

### **(R)-2-(4-bromophenyl)-N-(chroman-4-yl)ethan-1-amine (3ai)**

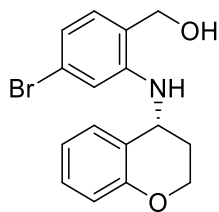

Light red oil (51.4 mg, 77% yield, 97% *ee*).  $^1\text{H NMR}$  (500 MHz,  $\text{CDCl}_3$ ):  $\delta$  7.29–7.22 (m, 1H), 7.21–7.14 (m, 1H), 7.06 (t,  $J = 8.1$  Hz, 1H), 6.96–6.82 (m, 3H), 6.77 (d,  $J = 8.1$  Hz, 1H), 5.25 (br s, 1H), 4.93–4.78 (m, 2H), 4.63 (t,  $J = 4.2$  Hz, 1H), 4.27–4.16 (m, 2H), 2.19–2.06 (m, 2H).  $^{13}\text{C NMR}$ : (125 MHz,  $\text{CDCl}_3$ )  $\delta$  155.0, 147.5, 130.4, 130.0, 129.3, 125.1, 123.1, 122.7, 121.2, 120.8, 117.2, 110.0, 62.8, 62.7, 46.6, 27.7.  $[\alpha]_D^{27} = 601.3$  (c 1.0,  $\text{CHCl}_3$ ). The enantiomeric excess was determined by Daicel Chiralcel OJ-3 (0.46 cm x 25 cm), Hexanes / IPA = 75 / 25, 1.0 mL/min,  $\lambda = 254$  nm,  $t_r$  (minor) = 11.0 min,  $t_r$  (major) = 13.4 min. HRMS (ESI)  $m/z$ :  $[\text{M}+\text{H}]^+$  calcd for  $\text{C}_{16}\text{H}_{17}\text{BrNO}_2$ , 334.0443; found 334.0436.

### **(*R*)-2-bromo-6-(chroman-4-ylamino)phenylmethanol (3aj)**

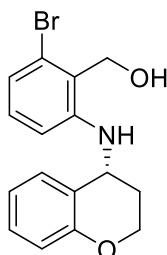

Yellow needle crystal (49.3 mg, 74% yield, 97% *ee*). M.p. 111–113 °C.  $^1\text{H NMR}$  (500 MHz,  $\text{CDCl}_3$ ):  $\delta$  7.29–7.26 (m, 1H), 7.23–7.17 (m, 1H), 7.10–7.05 (m, 1H), 6.97–6.85 (m, 3H), 6.80–6.75 (m, 1H), 5.27 (br s, 1H), 4.95–4.79 (m, 2H), 4.69–4.60 (m, 1H), 4.29–4.19 (m, 2H), 2.18–2.09 (m, 2H).  $^{13}\text{C NMR}$ : (125 MHz,  $\text{CDCl}_3$ )  $\delta$  155.0, 147.5, 130.4, 130.0, 129.3, 125.1, 123.1, 122.8, 121.2, 120.8, 117.2, 110.0, 62.8, 62.7, 46.6, 27.7.  $[\alpha]_D^{28} = 573.0$  (c 1.0,  $\text{CHCl}_3$ ). The enantiomeric excess was determined by Daicel Chiralcel OJ-3 (0.46 cm x 25 cm), Hexanes / IPA = 75 / 25, 1.0 mL/min,  $\lambda = 254$  nm,  $t_r$  (minor) = 11.5 min,  $t_r$  (major) = 13.8 min. HRMS (ESI)  $m/z$ :  $[\text{M}+\text{H}]^+$  calcd for  $\text{C}_{16}\text{H}_{17}\text{BrNO}_2$ , 334.0443; found 334.0430.

### **(*R*)-2-(chroman-4-ylamino)-4,5-dimethoxyphenylmethanol (3ak)**

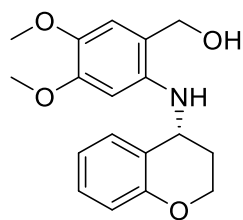

Yellow oil (45.3 mg, 72% yield, 97% *ee*).  $^1\text{H NMR}$  (500 MHz,  $\text{CDCl}_3$ ):  $\delta$  7.31 – 7.27 (m, 1H), 7.18 – 7.13 (m, 1H), 6.91 – 6.81 (m, 2H), 6.68 (s, 1H), 6.45 (s, 1H), 4.62 (t,  $J = 4.3$  Hz, 1H), 4.49 (s, 2H), 4.25 – 4.19 (m, 2H), 3.86 (s, 3H), 3.78 (s, 3H), 2.16 – 2.08 (m, 2H).  $^{13}\text{C NMR}$ : (125 MHz,  $\text{CDCl}_3$ )  $\delta$  155.0, 150.1, 140.6, 140.5, 130.1, 129.1, 123.4, 120.7, 117.0, 116.9, 115.1, 97.7, 63.8, 62.8, 57.0, 56.2, 47.3, 28.0.  $[\alpha]_{\text{D}}^{28} = 224.8$  (c 3.0,  $\text{CHCl}_3$ ). The enantiomeric excess was determined by Daicel Chiralcel OD-H (0.46 cm x 25 cm), Hexanes / IPA = 90 / 10, 1.0 mL/min,  $\lambda = 254$  nm,  $t_{\text{r}}$  (major) = 16.8 min,  $t_{\text{r}}$  (minor) = 19.1 min. HRMS (ESI)  $m/z$ :  $[\text{M}+\text{H}]^+$  calcd for  $\text{C}_{18}\text{H}_{22}\text{NO}_4$ , 316.1549; found 316.1542.

### **(*R*)-2-(2-(4-bromo-2-(chroman-4-ylamino)phenyl)methanol (3a))**

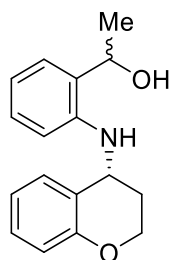

Yellow oil (23.1 mg, 43% yield, dr: 7:1, 99.8% *ee* (major), 87% *ee* (minor)).  $^1\text{H NMR}$  (500 MHz,  $\text{CDCl}_3$ ):  $\delta$  7.34 – 7.12 (m, 4H), 6.95 – 6.81 (m, 3H), 6.76 – 6.70 (m, 1H), 5.37 (br s, 1H), 4.95 – 4.83 (m, 1H), 4.73 – 4.61 (m, 1H), 4.33 – 4.18 (m, 2H), 2.23 – 2.09 (m, 2H), 1.59 – 1.54 (m, 3H).  $^{13}\text{C NMR}$ : (125 MHz,  $\text{CDCl}_3$ )  $\delta$  155.1, 145.0, 130.1, 129.0, 129.0, 127.7, 126.8, 123.4, 120.7, 117.0, 116.7, 110.8, 69.6, 62.9, 46.3, 27.8, 21.6.  $[\alpha]_{\text{D}}^{26} = 220.9$  (c 2.0,  $\text{CHCl}_3$ ) The enantiomeric excess was determined by Daicel Chiralcel OD-H (0.46 cm x 25 cm), Hexanes / IPA = 98 / 2, 1.0 mL/min,  $\lambda = 254$  nm,  $t_{\text{r-major}}$  (minor) = 18.0 min,  $t_{\text{r-major}}$  (major) = 21.5 min.  $T_{\text{r-minor}}$  (minor) = 12.0 min,  $t_{\text{r-minor}}$  (major) = 22.8 min. HRMS (ESI)  $m/z$ :  $[\text{M}+\text{H}]^+$  calcd for  $\text{C}_{17}\text{H}_{20}\text{NO}_2$ , 270.1494; found 270.1483.

### **(4-chloro-2-((*R*-chroman-4-yl)amino)phenyl)(phenyl)methanol (3am)**

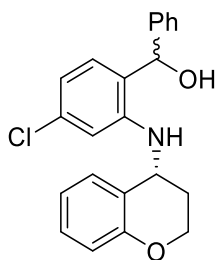

Yellow oil (65.6 mg, 90% yield, dr: 7:1, 99.5% *ee* (major), 84% *ee* (minor)). <sup>1</sup>H NMR (500 MHz, CDCl<sub>3</sub>): δ 7.34 – 7.22 (m, 5H), 7.20 – 7.12 (m, 2H), 7.04 – 6.99 (m, 1H), 6.85 – 6.66 (m, 4H), 5.69 (s, 1H), 4.86 – 4.73 (m, 1H), 4.50 – 4.42 (m, 1H), 4.18 – 3.92 (m, 2H), 2.40 (s, 1H), 2.13 – 1.92 (m, 2H). <sup>13</sup>C NMR (125 MHz, CDCl<sub>3</sub>): δ 154.8, 143.3, 141.0, 129.9, 129.0, 128.8, 128.8, 128.7, 128.3, 128.0, 126.4, 122.8, 121.4, 120.7, 116.9, 112.0, 74.7, 62.7, 46.6, 27.8. [α]<sup>25</sup><sub>D</sub> = 187.2 (c 2.0, CHCl<sub>3</sub>). The enantiomeric excess was determined by Daicel Chiralcel IB (0.46 cm x 25 cm), Hexanes / IPA = 95 / 5, 1.0 mL/min, λ = 254 nm, t<sub>r-major</sub> (minor) = 11.9 min, t<sub>r-major</sub> (major) = 18.5 min. T<sub>r-minor</sub> (minor) = 13.0 min, t<sub>r-minor</sub> (major) = 14.6 min. HRMS (ESI) m/z: [M+H]<sup>+</sup> calcd for C<sub>22</sub>H<sub>21</sub>ClNO<sub>2</sub>, 366.1261; found 366.1256.

**(R)-1-(2-(chroman-4-ylamino)phenyl)ethan-1-one (3al')**

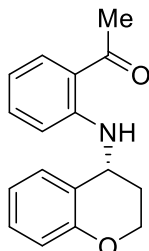

Yellow oil (48.6 mg, 91% yield, 97% *ee*). <sup>1</sup>H NMR (500 MHz, CDCl<sub>3</sub>): δ 9.32 - 9.16 (m, 1H), 7.86 – 7.78 (m, 1H), 7.44 – 7.40 (m, 1H), 7.30 – 7.25 (m, 1H), 7.22 – 7.17 (m, 1H), 6.93 – 6.86 (m, 3H), 6.69 – 6.65 (m, 1H), 4.82 – 4.73 (m, 1H), 4.29 – 4.21 (m, 2H), 2.58 (s, 3H), 2.25 – 2.11 (m, 2H). <sup>13</sup>C NMR: (125 MHz, CDCl<sub>3</sub>) δ 200.8, 154.9, 149.4, 135.2, 133.1, 129.8, 129.2, 122.6, 120.8, 118.0, 117.1, 114.6, 111.6, 63.0, 46.0, 28.2, 28.1. [α]<sup>25</sup><sub>D</sub> = 78.4 (c 2.0, CHCl<sub>3</sub>). The enantiomeric excess was determined by Daicel Chiralcel OJ-3 (0.46 cm x 25 cm), Hexanes / IPA = 70 / 30, 1.0 mL/min, λ = 254 nm, t<sub>r</sub> (minor) = 16.2 min, t<sub>r</sub> (major) = 20.2 min. HRMS (ESI) m/z: [M+H]<sup>+</sup> calcd for C<sub>17</sub>H<sub>18</sub>NO<sub>2</sub>, 268.1338; found 268.1332.

**(R)-(4-chloro-2-(chroman-4-ylamino)phenyl)(phenyl)methanone (3am')**



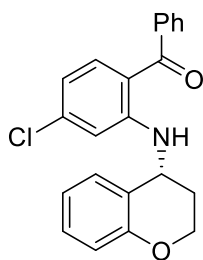

Yellow oil (69.0 mg, 95% yield, 96% *ee*).  $^1\text{H}$  NMR (400 MHz,  $\text{CDCl}_3$ ):  $\delta$  8.82 (d,  $J = 7.1$  Hz, 1H), 7.67 – 7.60 (m, 2H), 7.60 – 7.46 (m, 4H), 7.43 – 7.37 (m, 1H), 7.35 – 7.30 (m, 1H), 7.26 – 7.19 (m, 1H), 6.99 – 6.88 (m, 3H), 4.85 – 4.77 (m, 1H), 4.34 – 4.25 (m, 2H), 2.32 – 2.15 (m, 2H).  $^{13}\text{C}$  NMR: (100 MHz,  $\text{CDCl}_3$ )  $\delta$  198.1, 154.9, 148.6, 139.5, 134.9, 134.5, 131.5, 129.8, 129.4, 129.1, 128.3, 122.1, 120.9, 118.9, 118.5, 117.2, 113.2, 62.9, 46.4, 28.0.  $[\alpha]_{\text{D}}^{25} = 23.6$  (c 1.0,  $\text{CHCl}_3$ ). The enantiomeric excess was determined by Daicel Chiralcel OJ-3 (0.46 cm x 25 cm), Hexanes / IPA = 80 / 20, 1.0 mL/min,  $\lambda = 254$  nm,  $t_{\text{r}}$  (minor) = 13.8 min,  $t_{\text{r}}$  (major) = 15.8 min. HRMS (ESI)  $m/z$ :  $[\text{M}+\text{H}]^+$  calcd for  $\text{C}_{22}\text{H}_{19}\text{ClNO}_2$ , 364.1104; found 364.1095.

### **(R)-2-(2-(thiochroman-4-ylamino)phenyl)methanol (3na)**

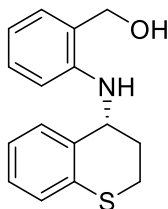

Yellow oil (47.7 mg, 88% yield, 94% *ee*).  $^1\text{H}$  NMR (500 MHz,  $\text{CDCl}_3$ ):  $\delta$  7.33 – 7.29 (m, 1H), 7.29 – 7.23 (m, 1H), 7.20 – 7.12 (m, 2H), 7.11 – 7.07 (m, 1H), 7.06 – 7.00 (m, 1H), 6.84 – 6.77 (m, 1H), 6.74 – 6.66 (m, 1H), 5.01 (br s, 1H), 4.74 – 4.67 (m, 1H), 4.65 – 4.57 (m, 2H), 3.24 – 3.15 (m, 1H), 2.94 – 2.86 (m, 1H), 2.49 – 2.40 (m, 1H), 2.18 – 2.09 (m, 1H).  $^{13}\text{C}$  NMR (125 MHz,  $\text{CDCl}_3$ ):  $\delta$  145.9, 134.6, 133.5, 130.3, 129.7, 129.6, 127.9, 126.9, 124.5, 124.4, 116.8, 110.9, 64.7, 50.1, 27.5, 22.9.  $[\alpha]_{\text{D}}^{25} = 32.0$  (c 1.0,  $\text{CHCl}_3$ ). The enantiomeric excess was determined by Daicel Chiralcel IC (0.46 cm x 25 cm), Hexanes / IPA = 97 / 3, 1.0 mL/min,  $\lambda = 254$  nm,  $t_{\text{r}}$  (major) = 14.2 min,  $t_{\text{r}}$  (minor) = 15.7 min. HRMS (ESI)  $m/z$ :  $[\text{M}+\text{H}]^+$  calcd for  $\text{C}_{16}\text{H}_{18}\text{NOS}$ , 272.1109; found 272.1098.

### **(R)-2-(4-fluoro-2-(thiochroman-4-ylamino)phenyl)methanol (3ng)**

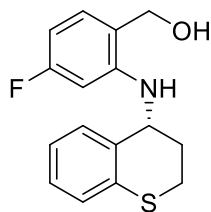

Light yellow oil (43.4 mg, 75% yield, 95% *ee*).  $^1\text{H NMR}$  (500 MHz,  $\text{CDCl}_3$ ):  $\delta$  7.29 – 7.27 (m, 1H), 7.18 – 7.13 (m, 2H), 7.07 – 6.99 (m, 2H), 6.53 – 6.45 (m, 1H), 6.40 – 6.31 (m, 1H), 5.18 (br s, 1H), 4.66 – 4.50 (m, 3H), 3.21 – 3.12 (m, 1H), 2.97 – 2.86 (m, 1H), 2.48 – 2.36 (m, 1H), 2.18 – 2.08 (m, 1H);  $^{13}\text{C NMR}$  (125 MHz,  $\text{CDCl}_3$ ):  $\delta$  164.4 (d,  $J = 243.5$  Hz), 147.6 (d,  $J = 10.9$  Hz), 134.0, 133.5, 130.7 (d,  $J = 10.5$  Hz), 130.3, 128.0, 127.0, 124.5, 120.1 (d,  $J = 2.3$  Hz), 102.6 (d,  $J = 21.7$  Hz), 98.2 (d,  $J = 26.3$  Hz), 64.0, 50.3, 27.4, 22.7.  $^{19}\text{F NMR}$  (376 MHz,  $\text{CDCl}_3$ ):  $\delta$  -111.86.  $[\alpha]_{\text{D}}^{26} = 34.9$  (c 1.0,  $\text{CHCl}_3$ ). The enantiomeric excess was determined by Daicel Chiralcel OJ-3 (0.46 cm x 25 cm), Hexanes / IPA = 90 / 10, 1.0 mL/min,  $\lambda = 254$  nm,  $t_{\text{r}}$  (major) = 9.6 min,  $t_{\text{r}}$  (minor) = 13.6 min. HRMS (ESI)  $m/z$ :  $[\text{M}+\text{H}]^+$  calcd for  $\text{C}_{16}\text{H}_{17}\text{FNOS}$ , 290.1015; found 290.1005.

**(*R*)-(4-chloro-2-(thiochroman-4-ylamino)phenyl)methanol (3nh)**

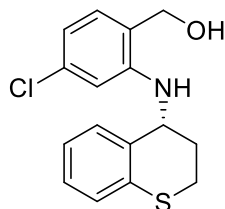

Yellow oil (45.1 mg, 74% yield, 92% *ee*).  $^1\text{H NMR}$  (500 MHz,  $\text{CDCl}_3$ ):  $\delta$  7.29 – 7.24 (m, 1H), 7.18 – 7.13 (m, 2H), 7.07 – 7.01 (m, 1H), 7.00 – 6.96 (m, 1H), 6.78 – 6.74 (m, 1H), 6.68 – 6.62 (m, 1H), 5.12 (br s, 1H), 4.65 (br s, 1H), 4.59 – 4.52 (m, 2H), 3.20 – 3.13 (m, 1H), 2.94 – 2.87 (m, 1H), 2.47 – 2.40 (m, 1H), 2.16 – 2.09 (m, 1H).  $^{13}\text{C NMR}$  (125 MHz,  $\text{CDCl}_3$ ):  $\delta$  146.9, 135.4, 133.9, 133.5, 130.4, 130.4, 128.0, 127.0, 124.5, 122.7, 116.4, 110.7, 64.1, 50.1, 27.3, 22.7.  $[\alpha]_{\text{D}}^{27} = 46.9$  (c 1.0,  $\text{CHCl}_3$ ). The enantiomeric excess was determined by Daicel Chiralcel IC (0.46 cm x 25 cm), Hexanes / IPA = 97 / 3, 1.0 mL/min,  $\lambda = 254$  nm,  $t_{\text{r}}$  (major) = 7.7 min,  $t_{\text{r}}$  (minor) = 8.5 min. HRMS (ESI)  $m/z$ :  $[\text{M}+\text{H}]^+$  calcd for  $\text{C}_{16}\text{H}_{17}\text{ClNOS}$ , 306.0719; found 306.0709.

**(*R*)-(5-bromo-2-(thiochroman-4-ylamino)phenyl)methanol (3nf)**

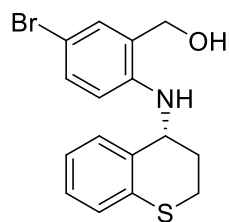

Light yellow oil (56.5 mg, 81% yield, 93% *ee*).  $^1\text{H NMR}$  (500 MHz,  $\text{CDCl}_3$ ):  $\delta$  7.33 – 7.30 (m, 1H), 7.27 – 7.24 (m, 1H), 7.21 – 7.12 (m, 3H), 7.06 – 7.01 (m, 1H), 6.73 – 6.61 (m, 1H), 5.00 (br s, 1H), 4.67 – 4.60 (m, 1H), 4.60 – 4.49 (m, 2H), 3.20 – 3.10 (m, 1H), 2.98 – 2.85 (m, 1H), 2.44 – 2.34 (m, 1H), 2.18 – 2.07 (m, 1H).  $^{13}\text{C NMR}$  (125 MHz,  $\text{CDCl}_3$ ):  $\delta$  144.9, 134.2, 133.5, 132.0, 131.9, 130.2, 128.0, 127.0, 126.3, 124.6, 112.6, 108.3, 63.9, 50.3, 27.4, 22.8.  $[\alpha]_{\text{D}}^{27} = 52.6$  (c 2.0,  $\text{CHCl}_3$ ). The enantiomeric excess was determined by Daicel Chiralcel IC (0.46 cm x 25 cm), Hexanes / IPA = 90 / 10, 1.0 mL/min,  $\lambda = 254$  nm,  $t_{\text{r}}$  (major) = 6.2 min,  $t_{\text{r}}$  (minor) = 7.1 min. HRMS (ESI)  $m/z$ :  $[\text{M}+\text{H}]^+$  calcd for  $\text{C}_{16}\text{H}_{17}\text{BrNOS}$ , 350.0214; found 350.0205.

**(*R*)-2-bromo-6-((thiochroman-4-ylamino)phenyl)methanol (3nj)**

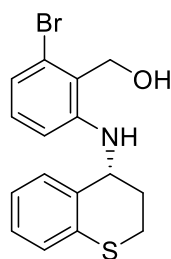

White solid (39.8 mg, 57% yield, 78% *ee*). M.p. 99-101 °C  $^1\text{H NMR}$  (400 MHz,  $\text{CDCl}_3$ ):  $\delta$  7.31 – 7.24 (m, 1H), 7.22 – 7.11 (m, 2H), 7.11 – 7.00 (m, 2H), 6.98 – 6.88 (m, 1H), 6.79 – 6.69 (m, 1H), 5.21 (br s, 1H), 4.94 – 4.81 (m, 2H), 4.71 – 4.61 (m, 1H), 3.23 – 3.10 (m, 1H), 2.99 – 2.83 (m, 1H), 2.48 – 2.35 (m, 1H), 2.20 – 2.06 (m, 1H).  $^{13}\text{C NMR}$  (100 MHz,  $\text{CDCl}_3$ ):  $\delta$  147.6, 134.2, 133.6, 130.4, 130.2, 128.0, 127.0, 125.0, 124.6, 123.0, 121.2, 110.3, 62.8, 50.5, 27.6, 22.9.  $[\alpha]_{\text{D}}^{25} = 46.2$  (c 1.0,  $\text{CHCl}_3$ ). The enantiomeric excess was determined by Daicel Chiralcel IB (0.46 cm x 25 cm), Hexanes / IPA = 80 / 20, 1.0 mL/min,  $\lambda = 254$  nm,  $t_{\text{r}}$  (major) = 7.2 min,  $t_{\text{r}}$  (minor) = 8.5 min. HRMS (ESI)  $m/z$ :  $[\text{M}+\text{H}]^+$  calcd for  $\text{C}_{16}\text{H}_{17}\text{BrNOS}$ , 350.0214; found 350.0204.

**(4-chloro-2-(((*R*)-thiochroman-4-yl)amino)phenyl)(phenyl)methanol (3nm)**

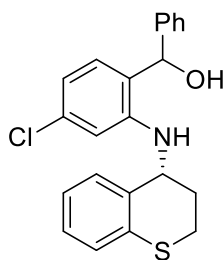

Yellow oil (57.2 mg, 75% yield, dr: 5:1, 99.5% *ee*(major), 69% *ee*(minor)).  $^1\text{H}$  NMR (500 MHz,  $\text{CDCl}_3$ ):  $\delta$  7.33 – 7.27 (m, 5H), 7.18 – 7.15 (m, 1H), 7.13 – 7.07 (m, 3H), 7.01 – 6.86 (m, 2H), 6.70 – 6.63 (m, 1H), 5.74 – 5.67 (m, 1H), 4.74 (br s, 1H), 4.54 – 4.47 (m, 1H), 2.92 – 2.64 (m, 2H), 2.41 (br s, 1H), 2.28 – 2.01 (m, 2H).  $^{13}\text{C}$  NMR (125 MHz,  $\text{CDCl}_3$ ):  $\delta$  143.2, 141.0, 134.2, 133.2, 129.9, 128.8, 128.7, 128.6, 128.3, 128.0, 127.8, 126.8, 126.5, 124.5, 121.4, 112.2, 74.6, 50.4, 27.5, 22.8.  $[\alpha]^{25}_{\text{D}} = 13.5$  (c 2.0,  $\text{CHCl}_3$ ). The enantiomeric excess was determined by Daicel Chiralcel IB (0.46 cm x 25 cm), Hexanes / IPA = 95 / 5, 1.0 mL/min,  $\lambda = 254$  nm,  $t_{\text{r-major}}$  (major) = 13.0 min,  $t_{\text{r-major}}$  (minor) = 21.9 min.  $T_{\text{r-minor}}$  (minor) = 14.5 min,  $t_{\text{r-minor}}$  (major) = 17.2 min. HRMS (ESI)  $m/z$ :  $[\text{M}+\text{H}]^+$  calcd for  $\text{C}_{22}\text{H}_{21}\text{ClNOS}$ , 382.1032; found 382.1022.

**(*R*)-4-chloro-2-(thiochroman-4-ylamino)phenyl(phenyl)methanone (3nm')**

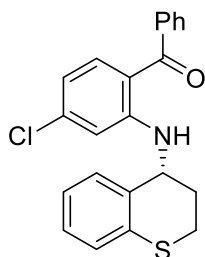

Yellow oil (53.8 mg, 71% yield, 92% *ee*).  $^1\text{H}$  NMR (500 MHz,  $\text{CDCl}_3$ ):  $\delta$  8.83 (d,  $J = 7.5$  Hz, 1H), 7.65 – 7.60 (m, 2H), 7.57 – 7.51 (m, 2H), 7.50 – 7.45 (m, 2H), 7.37 – 7.32 (m, 1H), 7.32 – 7.27 (m, 1H), 7.21 – 7.14 (m, 2H), 7.08 – 7.03 (m, 1H), 6.87 – 6.83 (m, 1H), 4.78 – 4.73 (m, 1H), 3.19 – 3.11 (m, 1H), 3.03 – 2.96 (m, 1H), 2.41 – 2.25 (m, 2H).  $^{13}\text{C}$  NMR (125 MHz,  $\text{CDCl}_3$ ):  $\delta$  198.2, 148.7, 139.5, 134.9, 134.4, 134.0, 133.6, 131.5, 129.4, 129.2, 129.2, 128.3, 128.3, 128.0, 127.2, 124.7, 118.9, 118.4, 113.5, 50.4, 28.3, 23.4.  $[\alpha]^{28}_{\text{D}} = 9.9$  (c 1.0,  $\text{CHCl}_3$ ). The enantiomeric excess was determined by Daicel Chiralcel OJ-3 (0.46 cm x 25 cm), Hexanes / IPA = 80 / 20, 1.0 mL/min,  $\lambda = 254$  nm,  $t_{\text{r}}$  (minor) = 13.4 min,  $t_{\text{r}}$  (major) = 22.0 min. HRMS (ESI)  $m/z$ :  $[\text{M}+\text{H}]^+$  calcd for  $\text{C}_{22}\text{H}_{19}\text{ClNOS}$ , 380.0876; found 380.0865.

### 1-(2-(((*R*)-thiochroman-4-yl)amino)phenyl)ethan-1-ol (**3nl**)

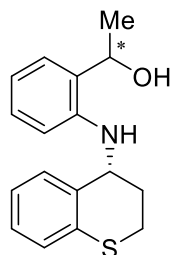

Light yellow oil (46.5 mg, 82% yield, dr: 6:1, 99 % *ee*(major), 72% *ee*(minor)).  $^1\text{H NMR}$  (500 MHz,  $\text{CDCl}_3$ ):  $\delta$  7.34 – 7.30 (m, 1H), 7.24 – 7.20 (m, 1H), 7.19 – 7.11 (m, 3H), 7.08 – 7.02 (m, 1H), 6.84 – 6.79 (m, 1H), 6.76 – 6.70 (m, 1H), 4.93 – 4.85 (m, 1H), 4.72 – 4.67 (m, 1H), 3.25 – 3.14 (m, 1H), 2.96 – 2.87 (m, 1H), 2.50 – 2.39 (m, 1H), 2.18 – 2.12 (m, 1H), 1.59 – 1.54 (m, 3H)  $^{13}\text{C NMR}$ : (125 MHz,  $\text{CDCl}_3$ )  $\delta$  145.2, 134.8, 133.4, 130.2, 128.9, 127.8, 127.7, 126.9, 126.8, 124.5, 116.7, 111.2, 69.8, 50.2, 27.7, 23.0, 21.8.  $[\alpha]_D^{25} = 63.9$  (c 2.0,  $\text{CHCl}_3$ ). The enantiomeric excess was determined by Daicel Chiralcel IB (0.46 cm x 25 cm), Hexanes / IPA = 95 / 5, 1.0 mL/min,  $\lambda = 254$  nm,  $t_{r\text{-major}}$  (major) = 13.8 min,  $t_{r\text{-major}}$  (minor) = 9.9 min.  $T_{r\text{-minor}}$  (minor) = 14.5 min,  $t_{r\text{-minor}}$  (major) = 17.2 min. HRMS (ESI)  $m/z$ :  $[\text{M}+\text{H}]^+$  calcd for  $\text{C}_{17}\text{H}_{20}\text{NOS}$ , 286.1266; found 286.1261.

### (*R*)-1-(2-(thiochroman-4-ylamino)phenyl)ethan-1-one (**3nl'**)

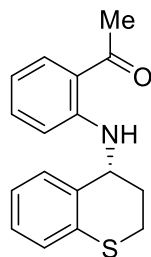

Yellow oil (32.8 mg, 58% yield, 93% *ee*).  $^1\text{H NMR}$  (500 MHz,  $\text{CDCl}_3$ ):  $\delta$  9.36 - 9.15 (m, 1H), 7.82 – 7.77 (m, 1H), 7.40 – 7.35 (m, 1H), 7.28 – 7.24 (m, 1H), 7.20 – 7.12 (m, 2H), 7.05 – 7.00 (m, 1H), 6.85 – 6.80 (m, 1H), 6.67 – 6.62 (m, 1H), 4.78 – 4.71 (m, 1H), 3.16 – 3.09 (m, 1H), 3.00 – 2.94 (m, 1H), 2.59 (s, 3H), 2.38 – 2.30 (m, 1H), 2.29 – 2.21 (m, 1H).  $^{13}\text{C NMR}$ : (125 MHz,  $\text{CDCl}_3$ )  $\delta$  200.9, 149.6, 135.2, 134.4, 133.5, 133.1, 129.4, 127.8, 127.1, 124.6, 117.8, 114.5, 111.9, 45.0, 28.4, 28.1, 23.5.  $[\alpha]_D^{25} = 18.6$  (c 1.0,  $\text{CHCl}_3$ ). The enantiomeric excess was determined by Daicel Chiralcel OJ-3 (0.46 cm x 25 cm), Hexanes / IPA = 70 / 30, 1.0 mL/min,  $\lambda = 254$  nm,  $t_r$  (major) = 12.6 min,  $t_r$  (minor) = 13.8 min. HRMS (ESI)  $m/z$ :  $[\text{M}+\text{H}]^+$  calcd for  $\text{C}_{17}\text{H}_{18}\text{NOS}$ , 284.1109; found 284.1104.

**ethyl 2-(1-((*R*)-chroman-4-yl)-2-oxo-1,2,3,5-tetrahydrobenzo[*e*][1,4]oxazepin-3-yl)acetate (4)**<sup>8</sup>

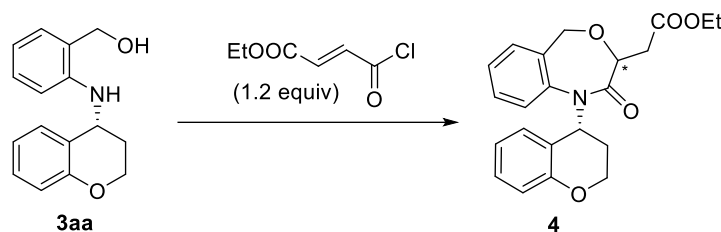

The solution of fumaric acid chloride monoethyl ester (38.9 mg, 0.24 mmol) in CH<sub>2</sub>Cl<sub>2</sub> (0.5 mL) was added dropwise to a solution of **3aa** (51.0 mg, 0.2 mmol) and NaHCO<sub>3</sub> (41.7 mg, 0.5 mmol) in CH<sub>2</sub>Cl<sub>2</sub> (1.5 mL). The reaction mixture was stirred for 2 h at room temperature and filtered. The filtrate was washed with water, dried over Na<sub>2</sub>SO<sub>4</sub>, and then concentrated under reduced pressure to give the mixture without further purify. The mixture, K<sub>2</sub>CO<sub>3</sub> (45.5 mg, 0.33 mmol), MeOH (1 mL) and water (150  $\mu$ L) was stirred overnight at room temperature. The reaction mixture was diluted with water, acidified, extracted with AcOEt. The extract was washed with water, dried over Na<sub>2</sub>SO<sub>4</sub>, and then concentrated under reduced pressure. The residue was purified by column chromatography to give the **4** as a solid in 65% yield (silica gel, PE/EA).

**Ethyl (R)-2-(1-(chroman-4-yl)-2-oxo-1,5-dihydro-3H-benzo[*e*][1,4]oxazepin-3(2H)-yl)acetate (4)**

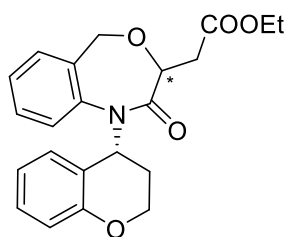

White solid (49.6 mg, 65% yield, dr: 4:1, 98% *ee*(major), 97% *ee*(minor)). M.p. 111-113 °C. <sup>1</sup>H NMR (500 MHz, CDCl<sub>3</sub>):  $\delta$  7.36 – 7.34 (m, 1H), 7.31 – 7.28 (m, 1H), 7.27 – 7.23 (m, 1H), 7.22 – 7.17 (m, 2H), 7.00 – 6.95 (m, 1H), 6.88 – 6.84 (m, 1H), 6.70 – 6.66 (m, 1H), 6.50 – 6.44 (m, 1H), 4.75 – 4.58 (m, 2H), 4.43 – 4.37 (m, 1H), 4.26 – 4.20 (m, 2H), 4.19 – 4.11 (m, 2H), 3.23 – 3.15 (m, 1H), 2.72 – 2.64 (m, 1H), 2.14 – 2.05 (m, 1H), 1.83 – 1.78 (m, 1H), 1.25 (t, *J* = 7.1 Hz, 3H). <sup>13</sup>C NMR (125 MHz, CDCl<sub>3</sub>):  $\delta$  170.9, 169.4, 155.0, 139.8, 130.4, 130.1, 130.0, 128.8, 127.8, 127.4, 122.9, 122.7, 121.4, 117.2, 70.2, 67.7, 65.3,

60.7, 49.7, 35.7, 26.3, 14.2.  $[\alpha]_D^{25} = -62.8$  (c 1.0,  $\text{CHCl}_3$ ). The enantiomeric excess was determined by Daicel Chiralcel OD-H (0.46 cm x 25 cm), Hexanes / IPA = 80 / 20, 1.0 mL/min,  $\lambda = 254$  nm,  $t_{r\text{-major}}$  (major) = 8.5 min,  $t_{r\text{-major}}$  (minor) = 19.0 min.  $T_{r\text{-minor}}$  (minor) = 12.9 min,  $t_{r\text{-minor}}$  (major) = 42.4 min. HRMS (ESI) m/z:  $[\text{M}+\text{H}]^+$  calcd for  $\text{C}_{22}\text{H}_{23}\text{NO}_5$ , 382.1654; found 382.1644.

### (R)-1-(chroman-4-yl)-1,4-dihydro-2H-benzo[d][1,3]oxazine (5)

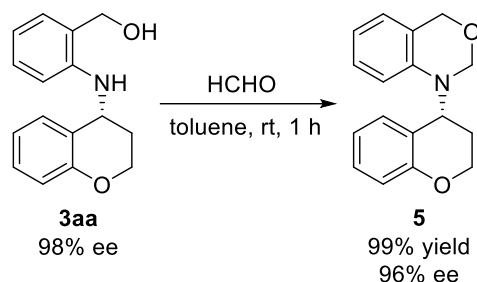

To the suspension of **3aa** (51.0 mg, 0.2 mmol) in 1 ml of toluene, a 0.1 mL of 37% formaldehyde solution was added. The mixture was then stirred vigorously at room temperature for 2h (The process of the reaction could be monitored by TLC analysis). The organic phase was separated and the aqueous layer was extracted with DCM (10 mL\*2). The combined organic solution was dried over  $\text{Na}_2\text{SO}_4$ , filtered, and concentrated in vacuo. The residue was purified by flash column chromatography using PE/EA to afford **5**. Light yellow oil (52.9 mg, 99% yield, 96% ee).  $^1\text{H}$  NMR (400 MHz,  $\text{CDCl}_3$ ):  $\delta$  7.49 – 7.44 (m, 1H), 7.22 – 7.15 (m, 2H), 7.04 – 7.00 (m, 1H), 6.99 – 6.89 (m, 3H), 6.88 – 6.83 (m, 1H), 5.00 – 4.95 (m, 1H), 4.94 – 4.86 (m, 2H), 4.67 – 4.45 (m, 2H), 4.36 – 4.29 (m, 1H), 4.21 – 4.14 (m, 1H), 2.35 – 2.25 (m, 1H), 2.14 – 2.07 (m, 1H).  $^{13}\text{C}$  NMR: (100 MHz,  $\text{CDCl}_3$ )  $\delta$  156.0, 143.6, 128.9, 128.7, 127.4, 125.2, 122.7, 120.7, 120.2, 117.5, 117.1, 117.1, 77.1, 67.8, 65.1, 56.3, 27.2.  $[\alpha]_D^{28} = 693.4$  (c 1.0,  $\text{CHCl}_3$ ). The enantiomeric excess was determined by Daicel Chiralcel OJ-3 (0.46 cm x 25 cm), Hexanes / IPA = 95 / 5, 1.0 mL/min,  $\lambda = 254$  nm,  $t_r$  (minor) = 16.9 min,  $t_r$  (major) = 29.7 min. HRMS (ESI) m/z:  $[\text{M}+\text{H}]^+$  calcd for  $\text{C}_{17}\text{H}_{18}\text{NO}_2$ , 268.1338; found 268.1334.

## 5. Reference

1. J. Chauhan, S. Fletcher, *Tetrahedron Lett.* 2012, **53**, 4951-4954.
2. H. Jin, L. Huang, J. Xie, M. Rudolph, F. Rominger, A. S. K. Hashmi, *Angew. Chem. Int. Ed.* 2016, **55**, 794-797.
3. H. Jin, B. Tian, X. Song, J. Xie, M. Rudolph, F. Rominger, A. S. K. Hashmi, *Angew. Chem. Int. Ed.* 2016, **55**, 12688-12692.

4. B. O. Ashburn, R. G. Carter, *Angew. Chem. Int. Ed.* 2006, **45**, 6737-6741.
5. S. Kumar, E. J. Wachtel, E. Keinan, *J. Org. Chem.* 1993, **58**, 3821-3827.
6. L. Ren, T. Lei, J.-X. Ye, L.-Z. Gong, *Angew. Chem. Int. Ed.* 2012, **124**, 795-798.
7. C. Efe, I. N. Lykakis, M. Stratakis, *Chem. Commun.* 2011, **47**, 803-805.
8. T. Miki, M. Kori, H. Mabuchi, H. Banno, R. Tozawa, M. Nakamura, S. Itokawa, Y. Sugiyama, H. Yukimasa, *Biorg. Med. Chem.* 2002, **10**, 401-414.

## 6. NMR Spectrum

### (*R*)-(2-(chroman-4-ylamino)phenyl)methanol (3aa)

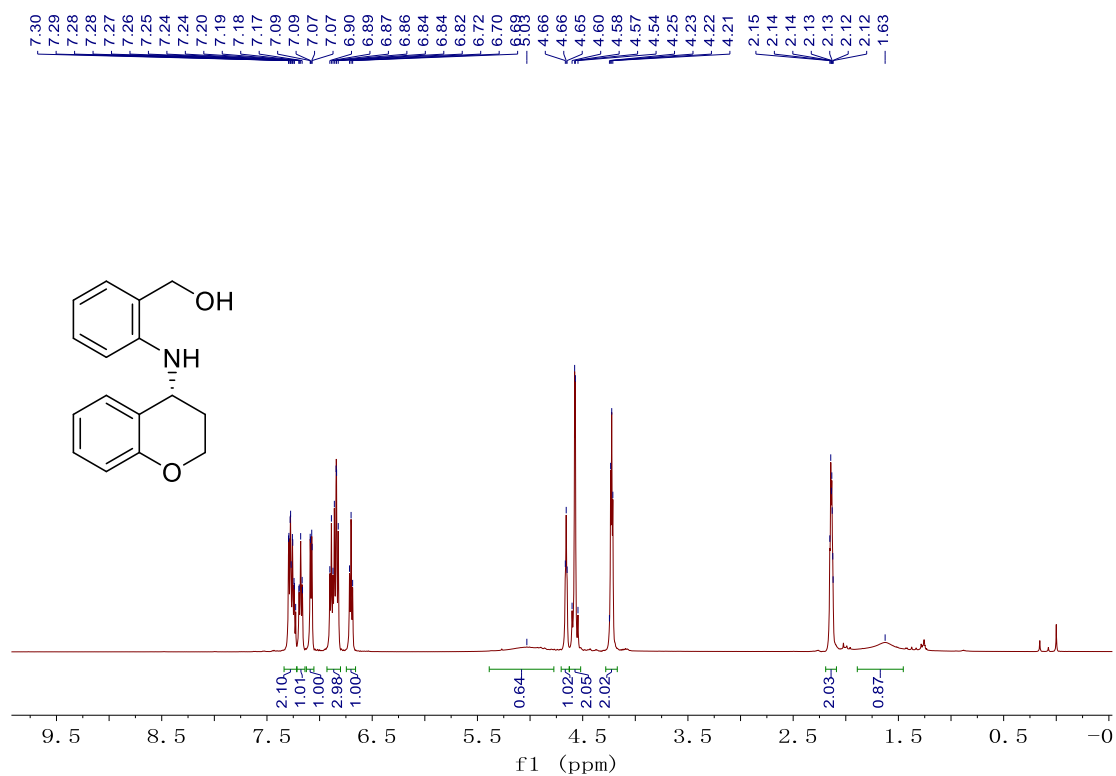



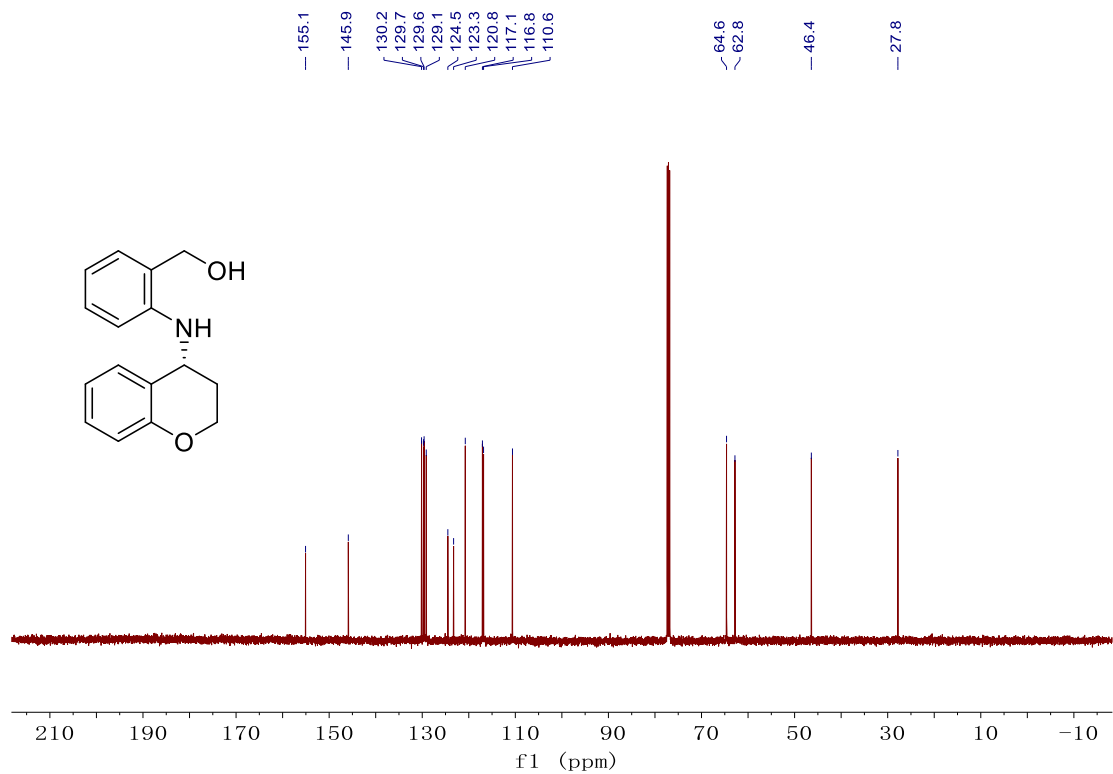

**(R)-2-((6-methoxychroman-4-yl)amino)phenyl)methanol (3ba)**

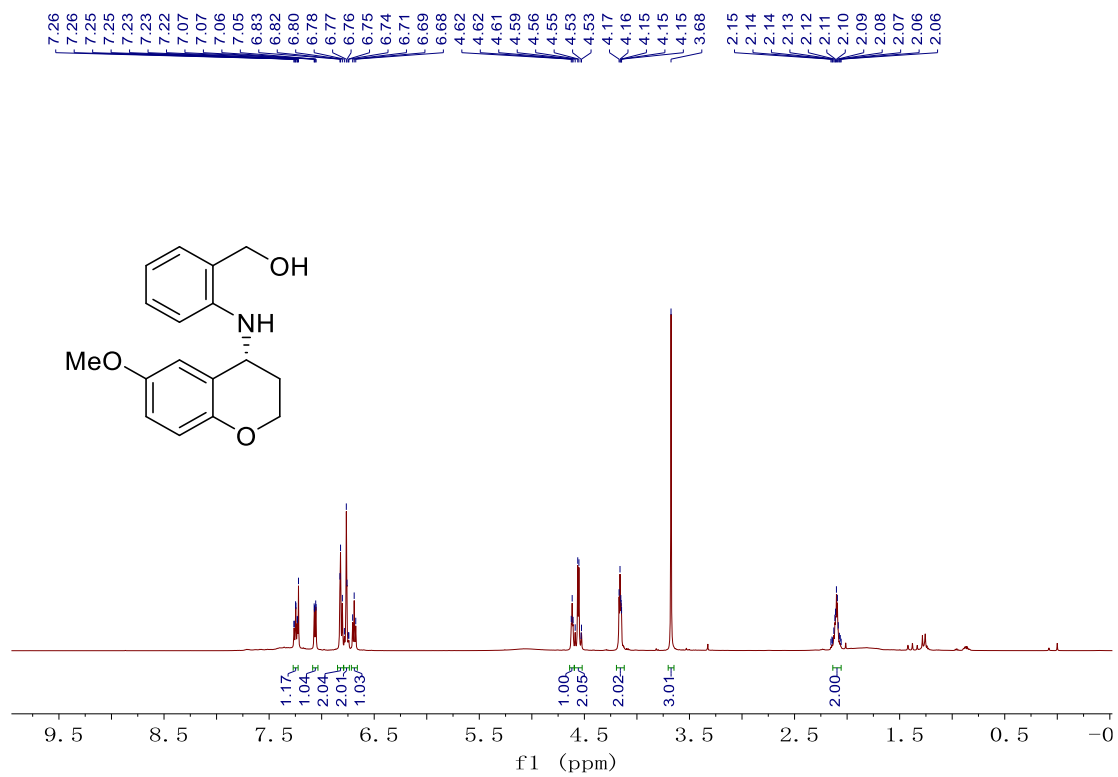

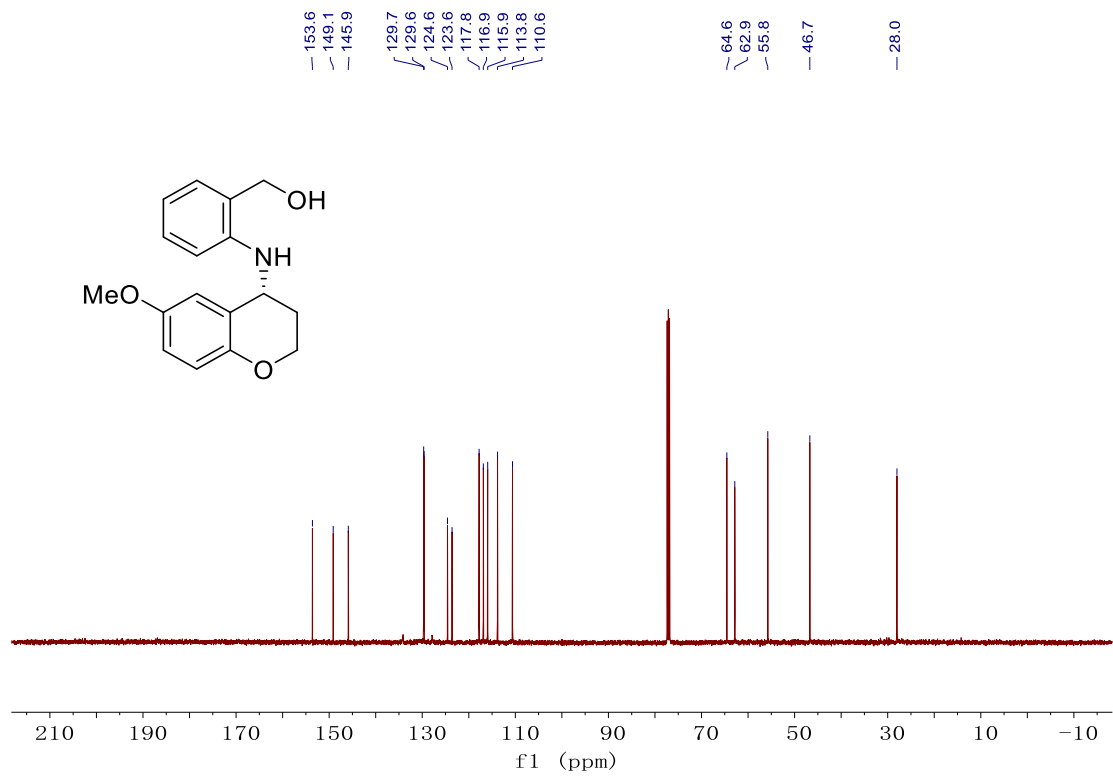

**(R)-2-((6-methylchroman-4-yl)amino)phenylmethanol (3ca)**

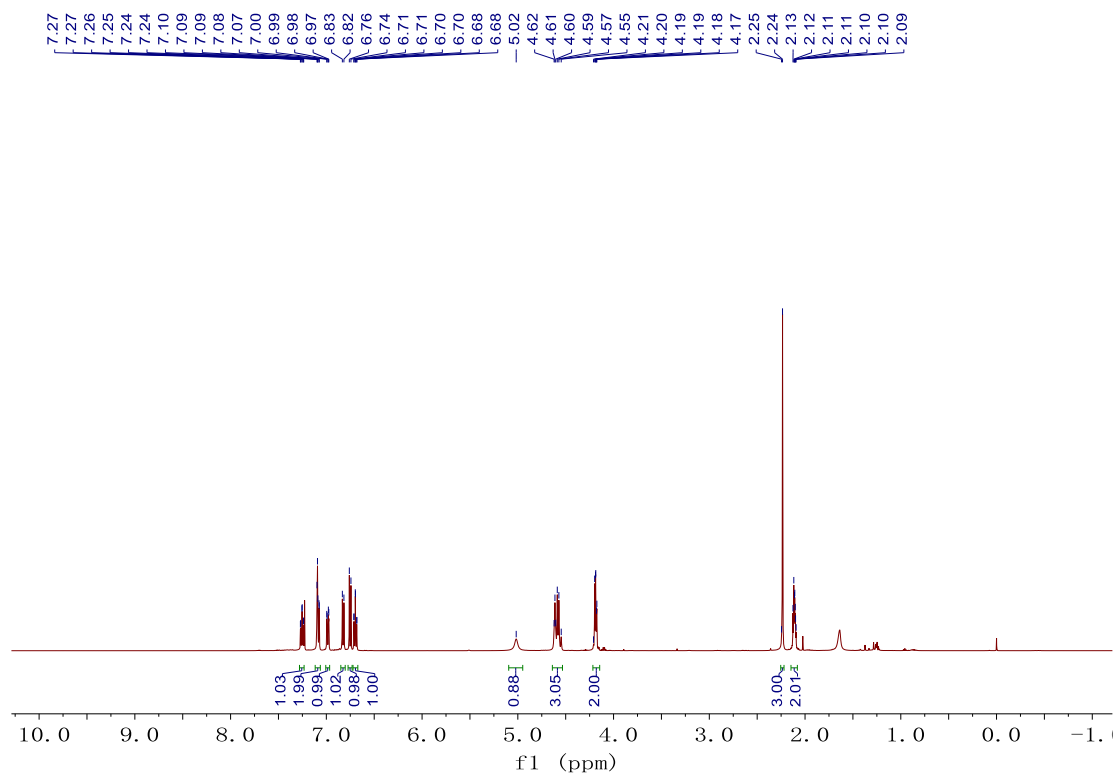

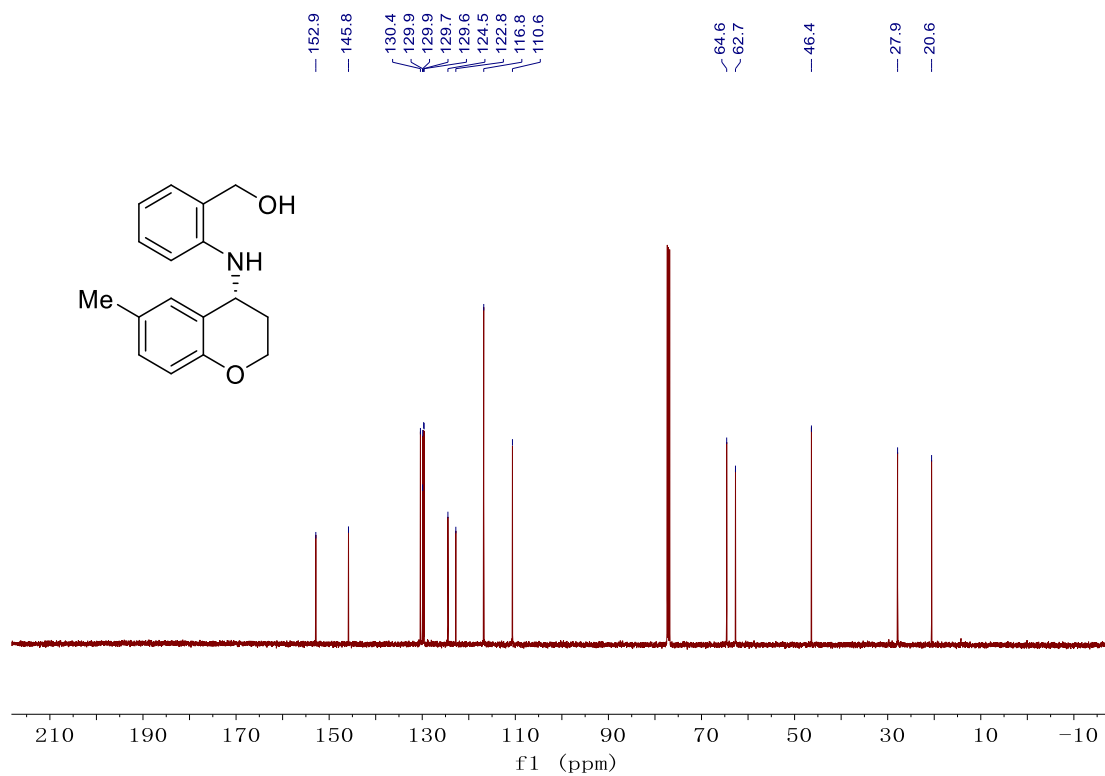

**(R)-2-((6-bromochroman-4-yl)amino)phenylmethanol (3da)**

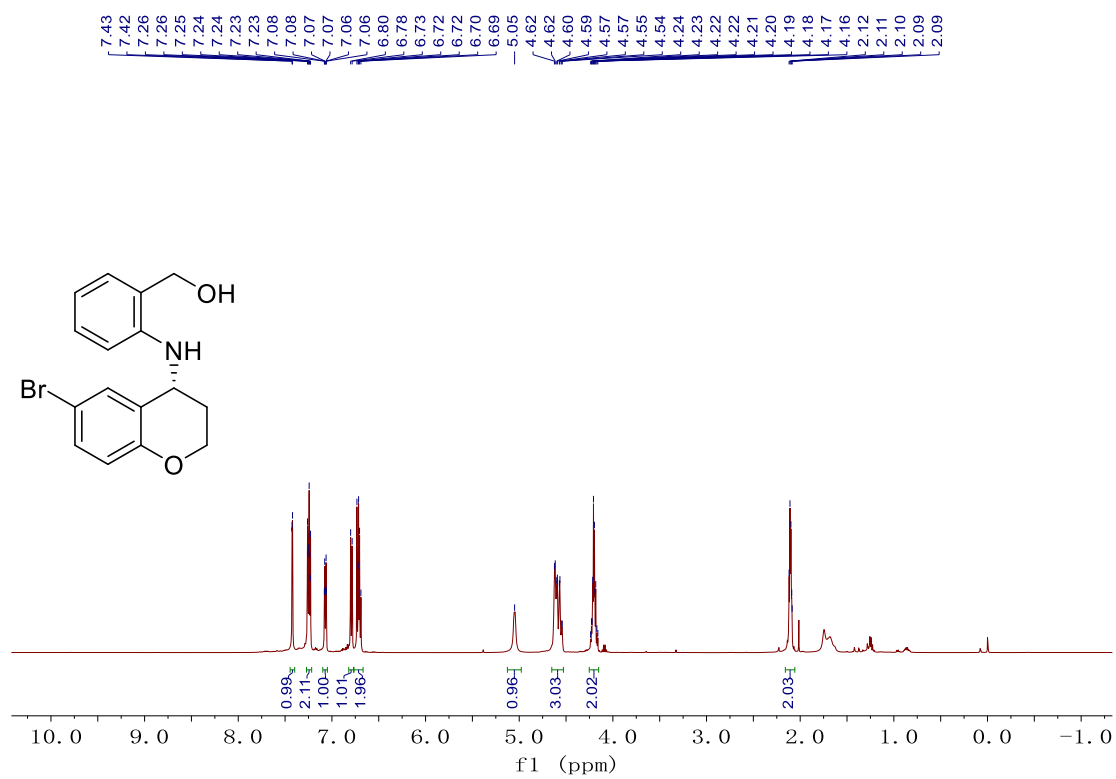

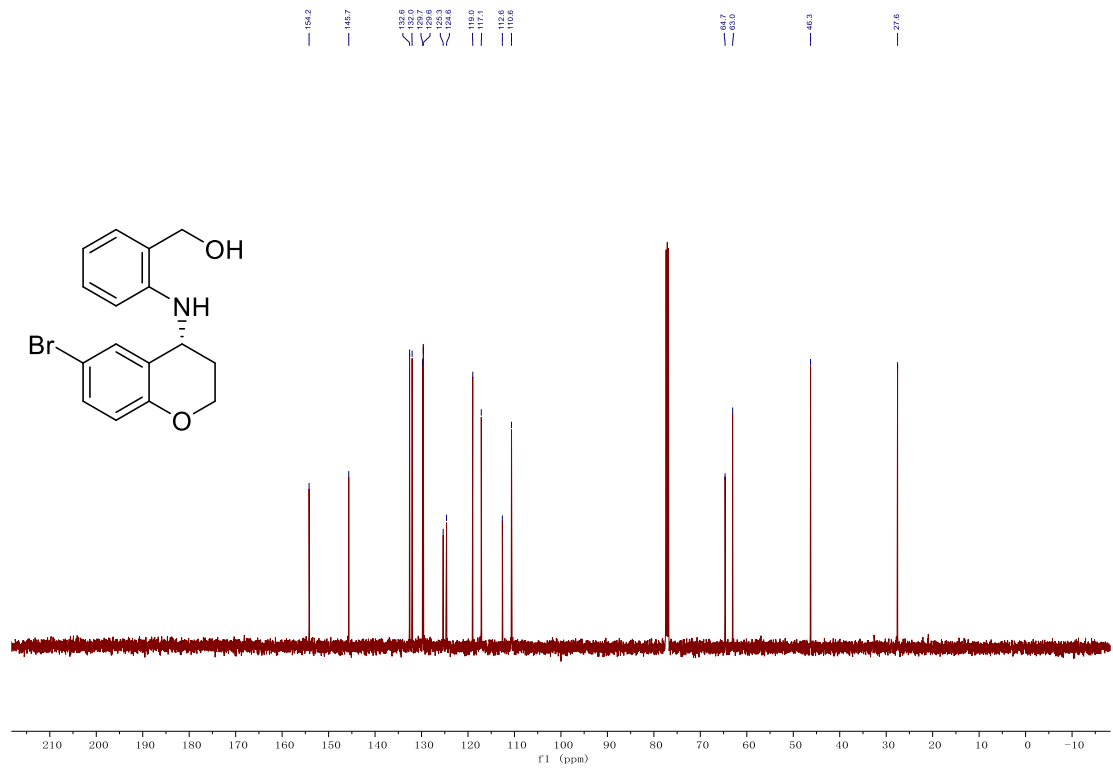

**(R)-2-((6-chlorochroman-4-yl)amino)phenylmethanol (3ea)**

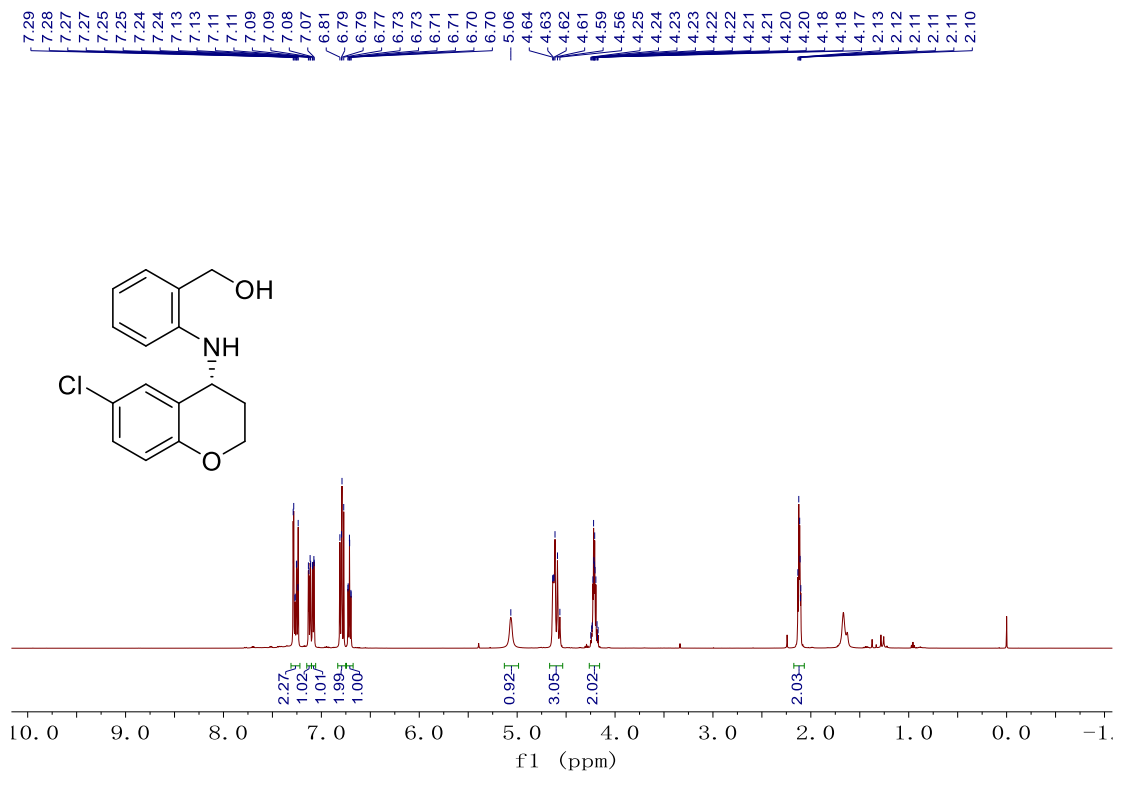

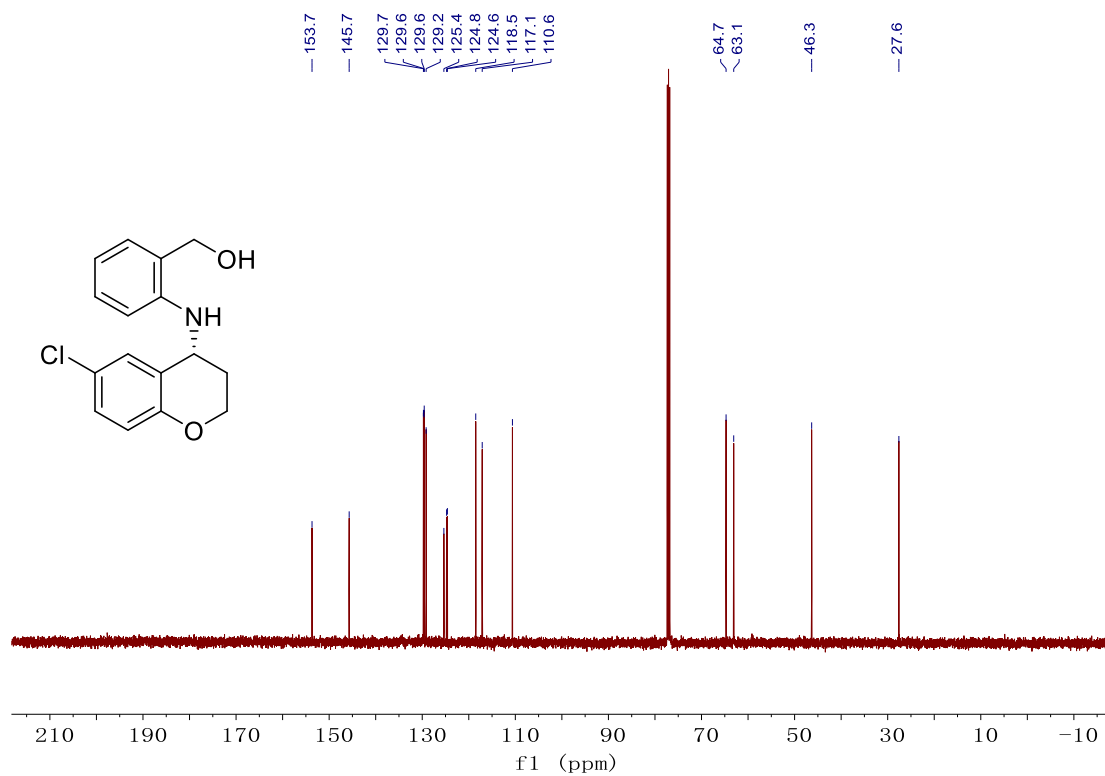

**(R)-2-((6-fluorochroman-4-yl)amino)phenylmethanol (3fa)**

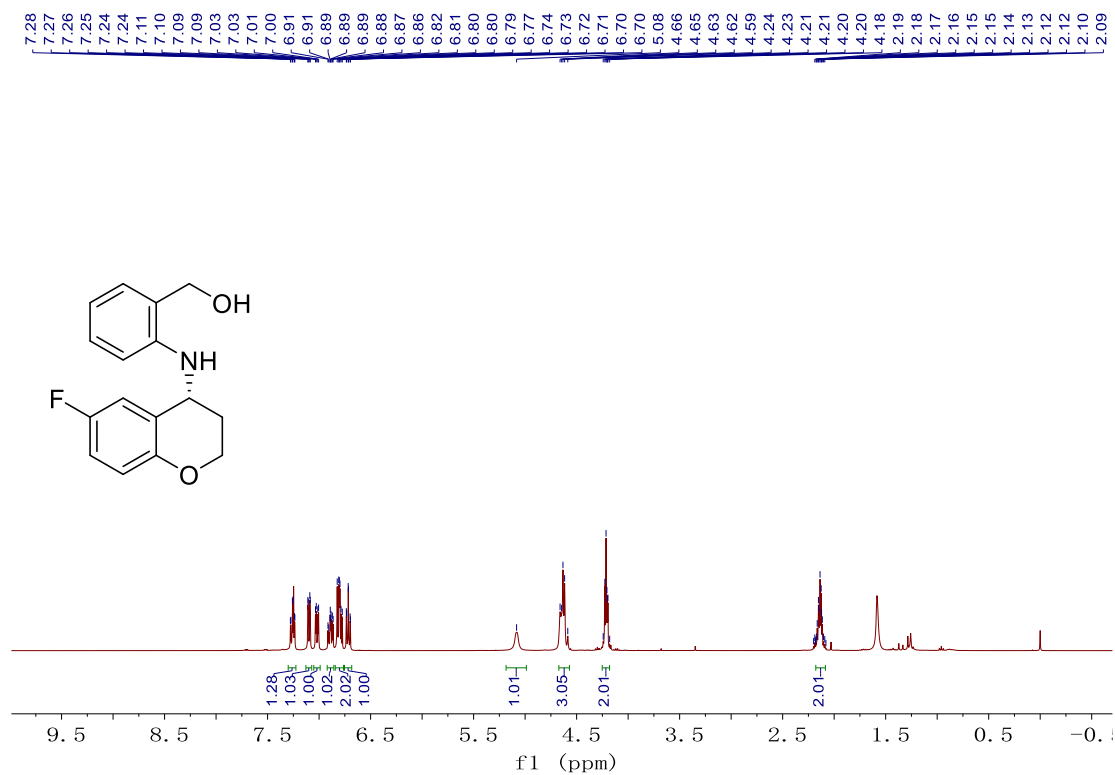

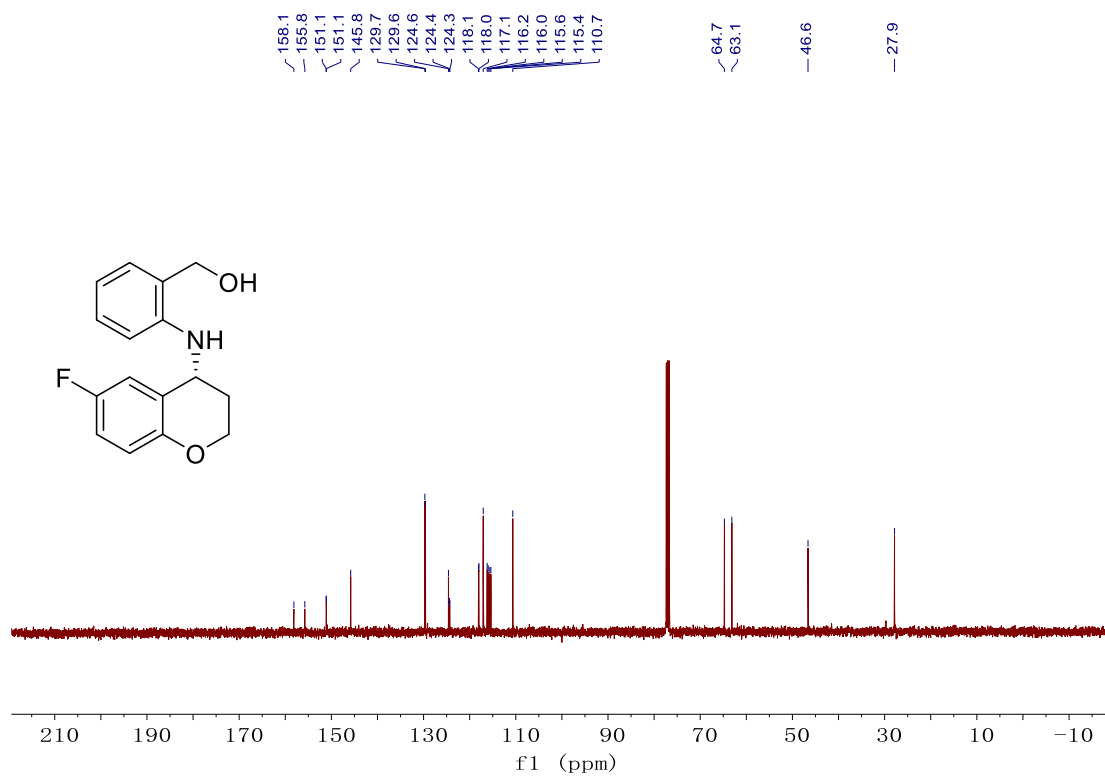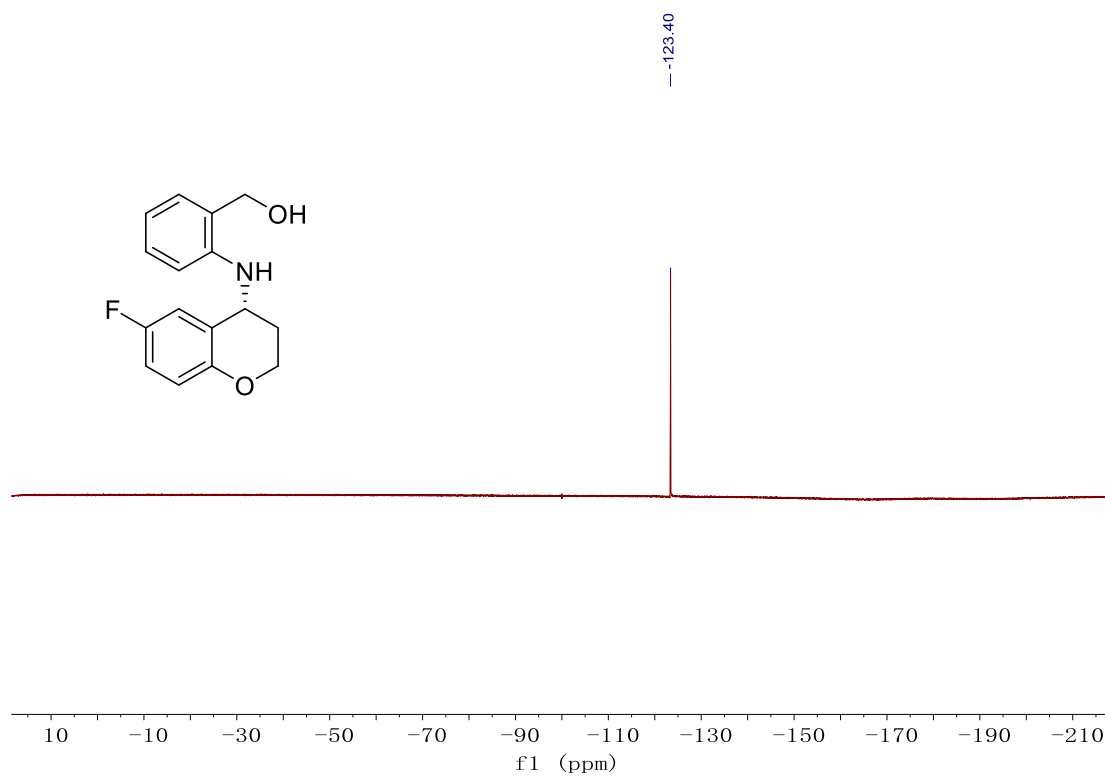

**(R)-2-((6-phenylchroman-4-yl)amino)phenylmethanol (3ga)**

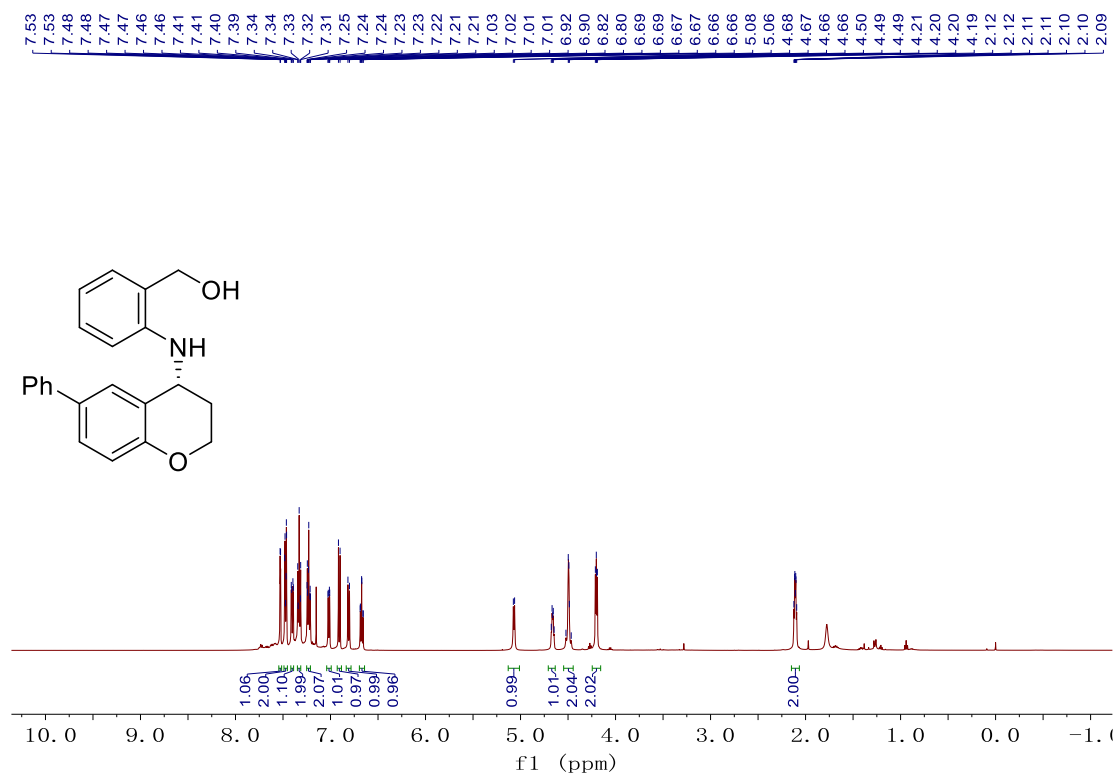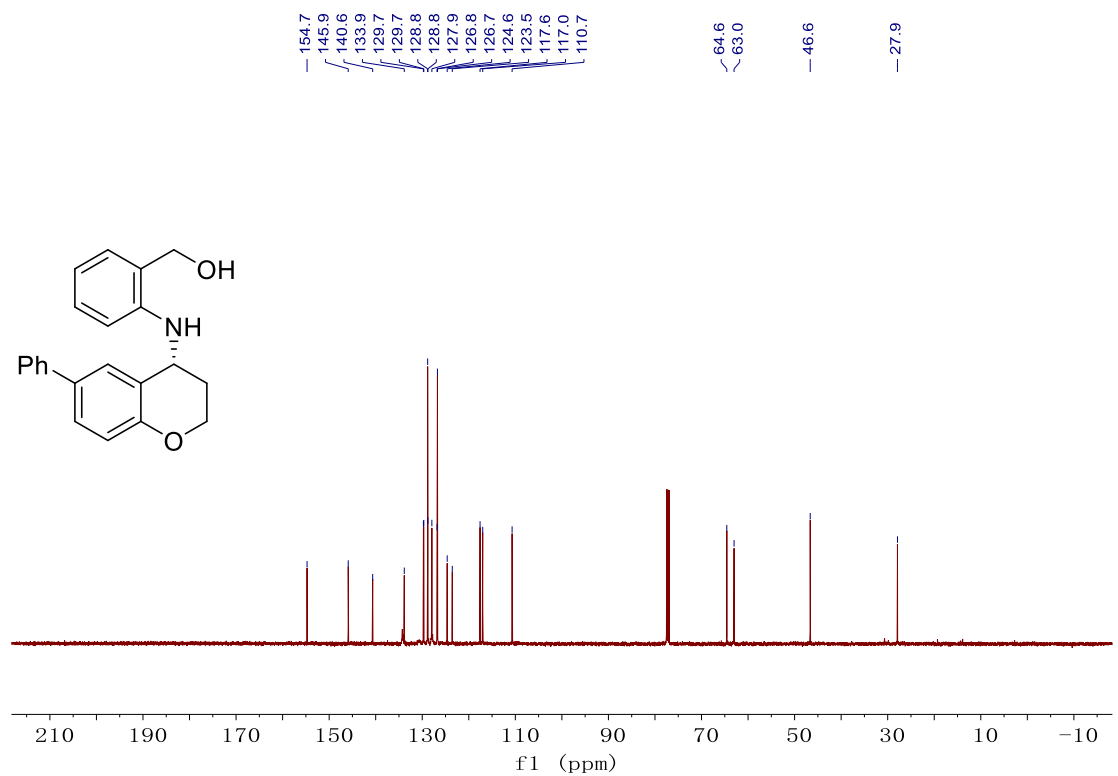

**(R)-2-((6,8-dimethylchroman-4-yl)amino)phenylmethanol (3ha)**

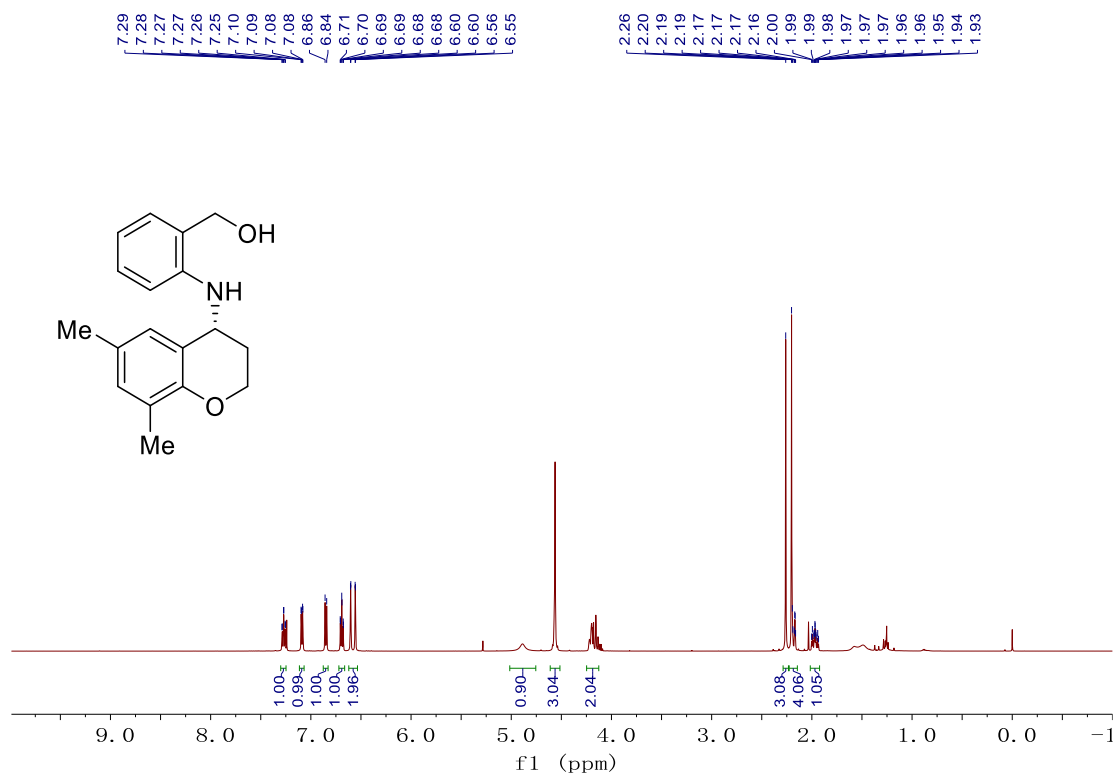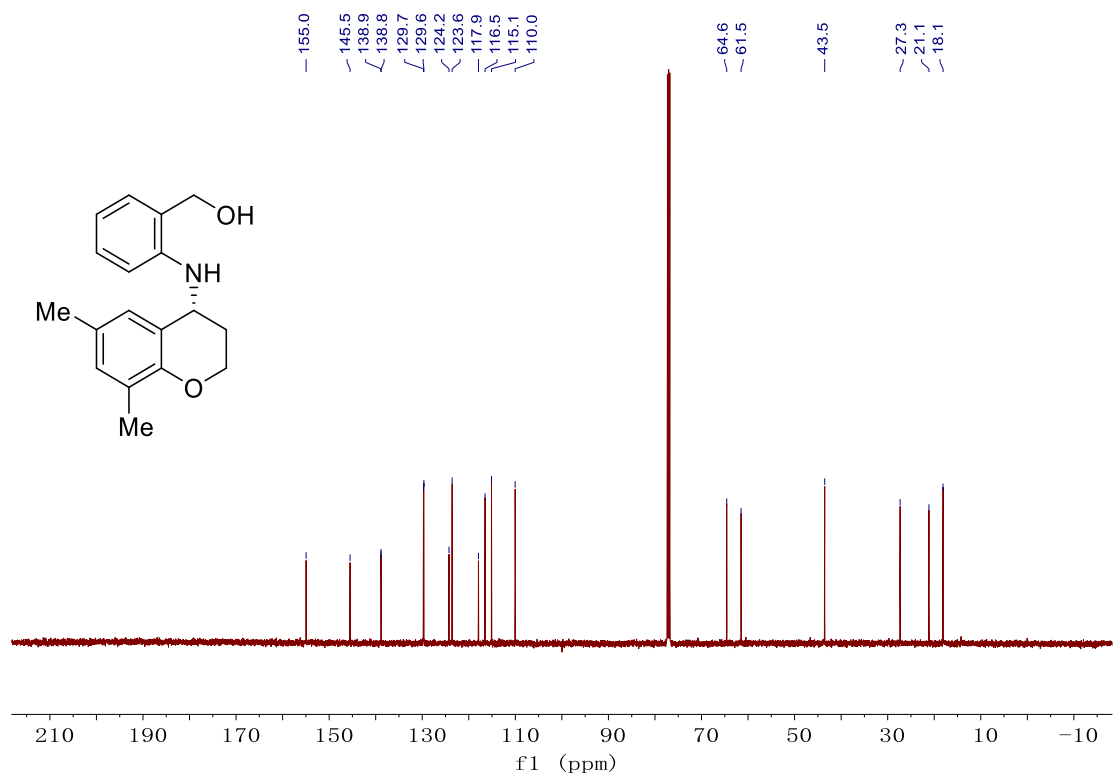

**(R)-2-((3,4-dihydro-2H-benzo[h]chromen-4-yl)amino)phenyl)methanol (3ia)**



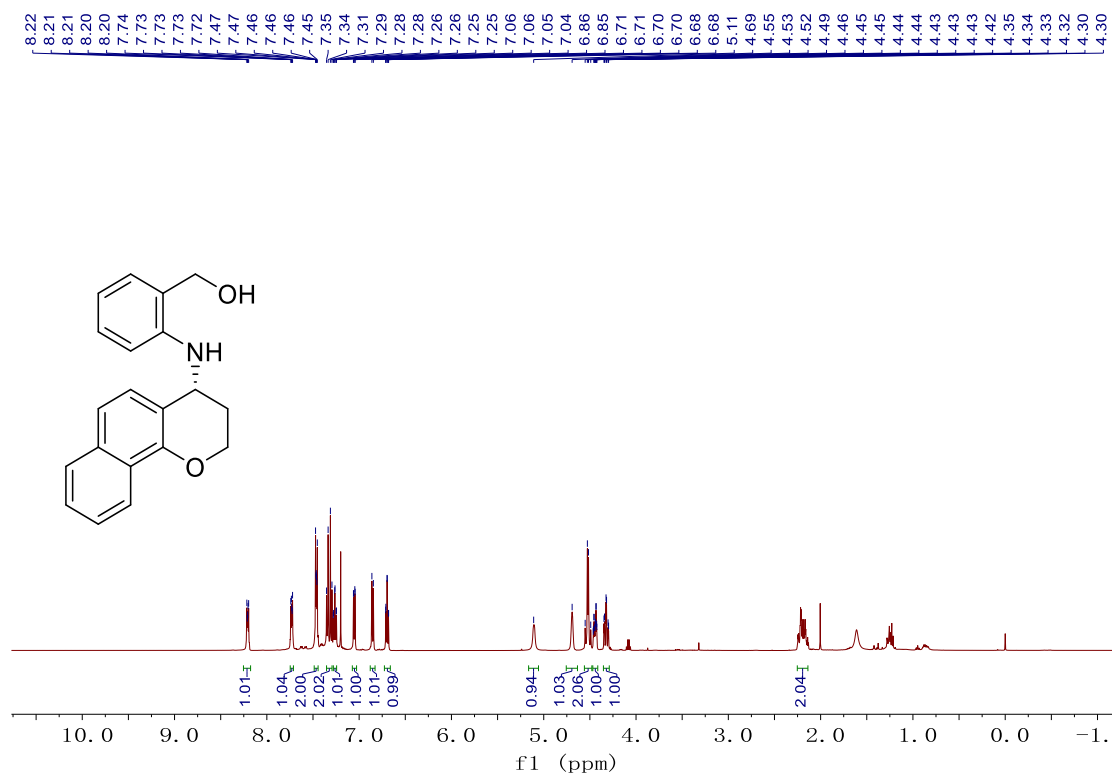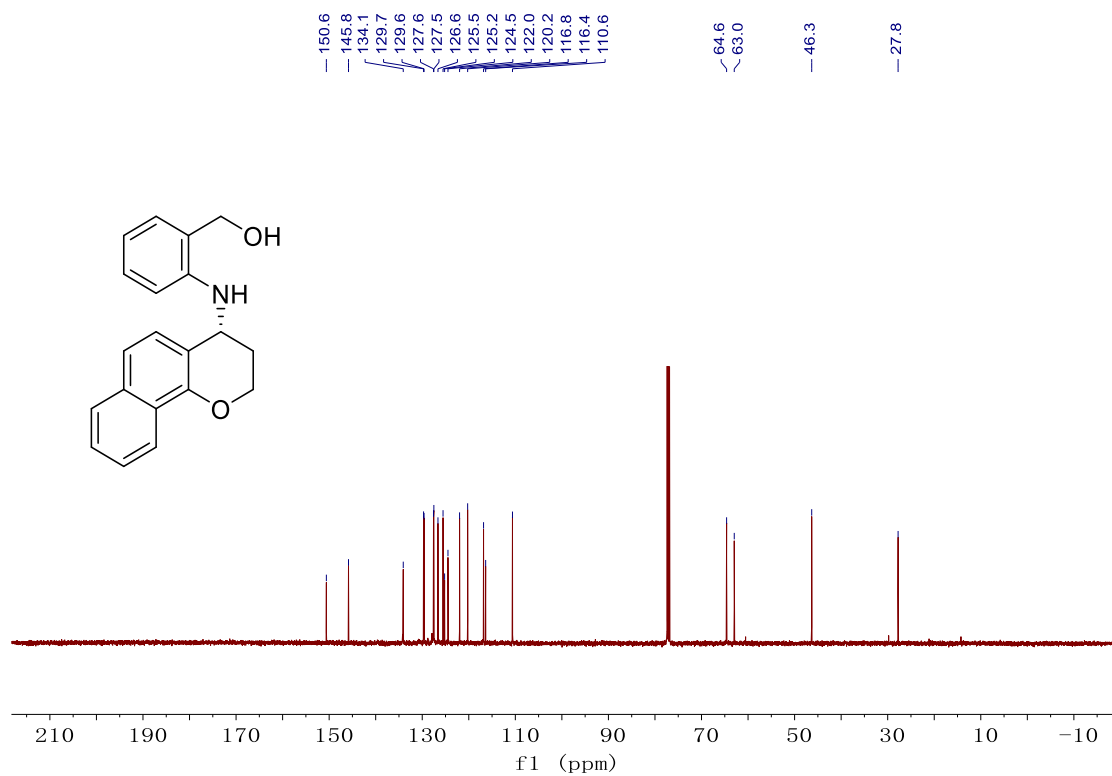

**(R)-2-((6,6-dimethyl-7,8-dihydro-6H-[1,3]dioxolo[4,5-g]chromen-8-yl)amino)phenylmethanol (3ja)**

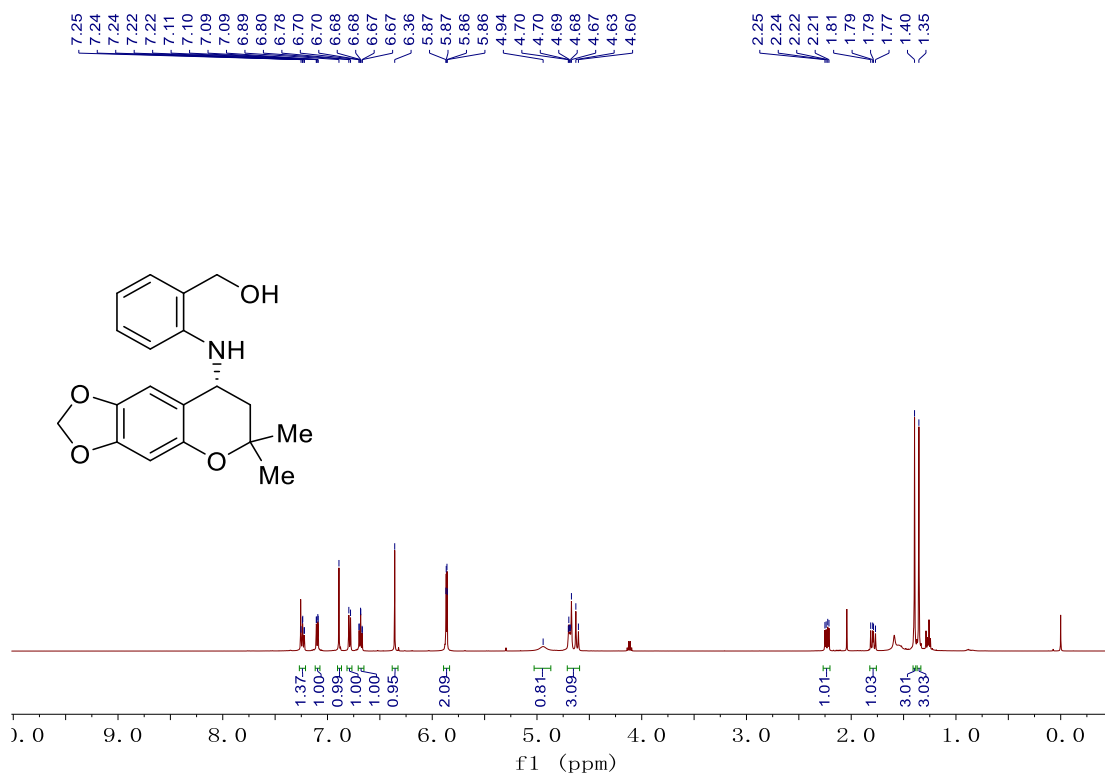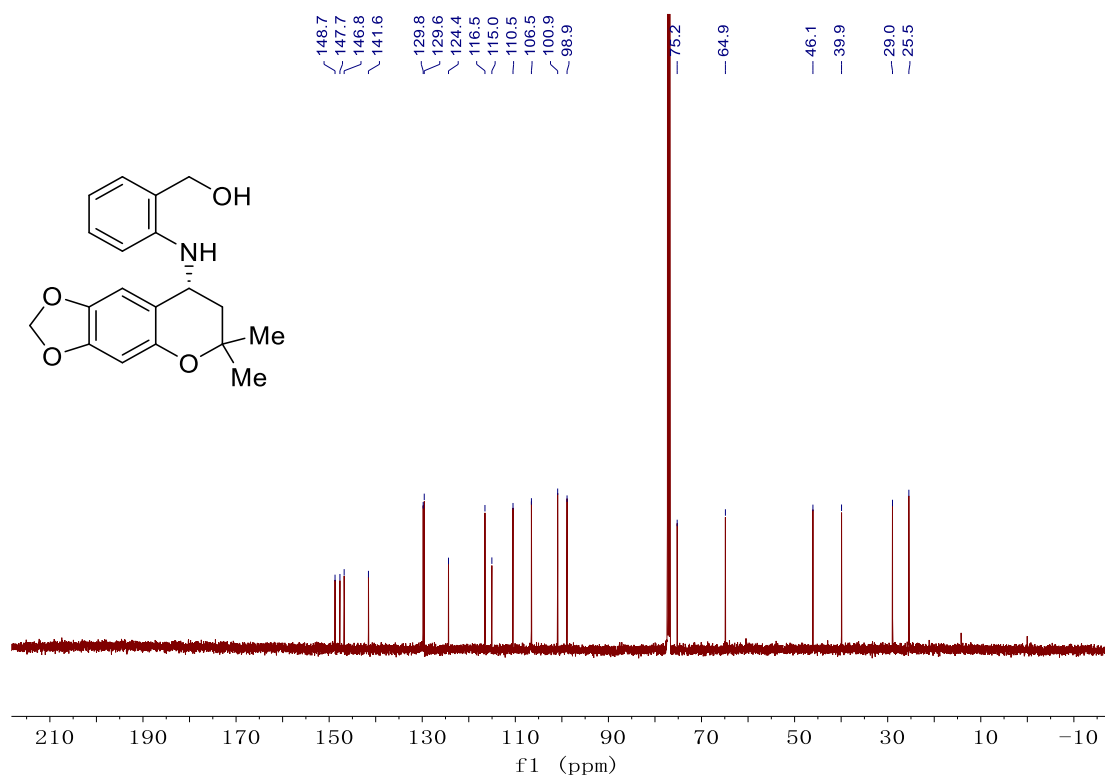

(2-(((2S,4R)-2-phenylchroman-4-yl)amino)phenyl)methanol (3ka)

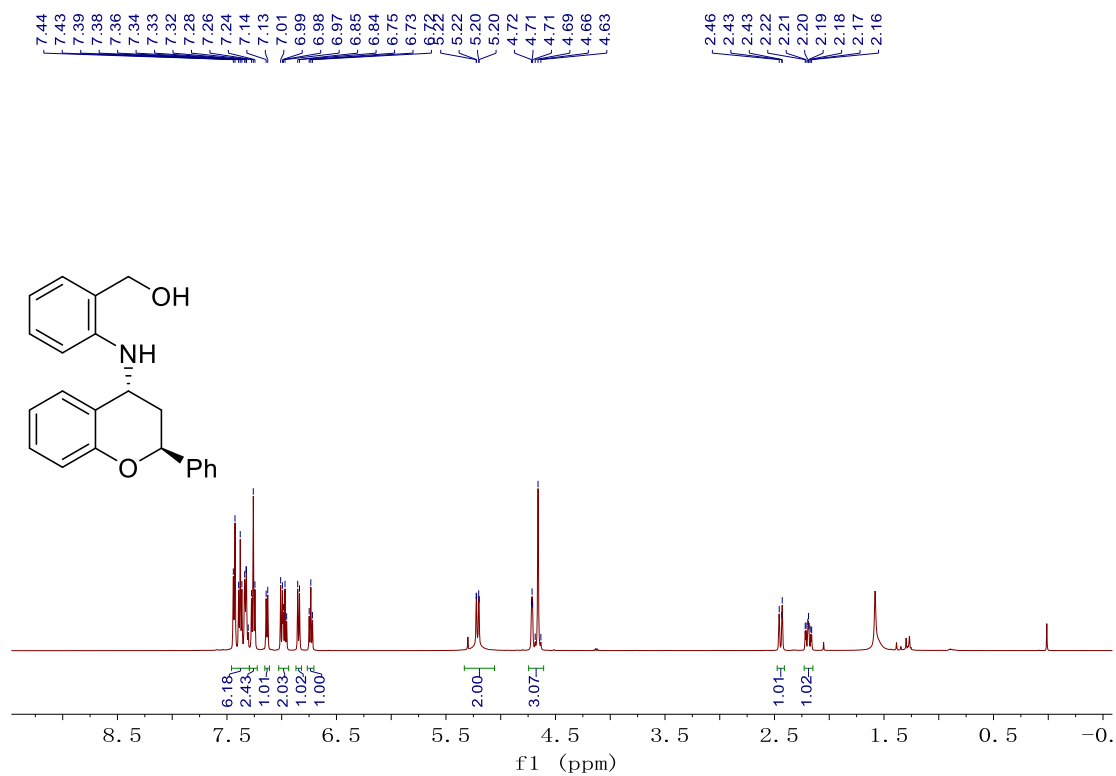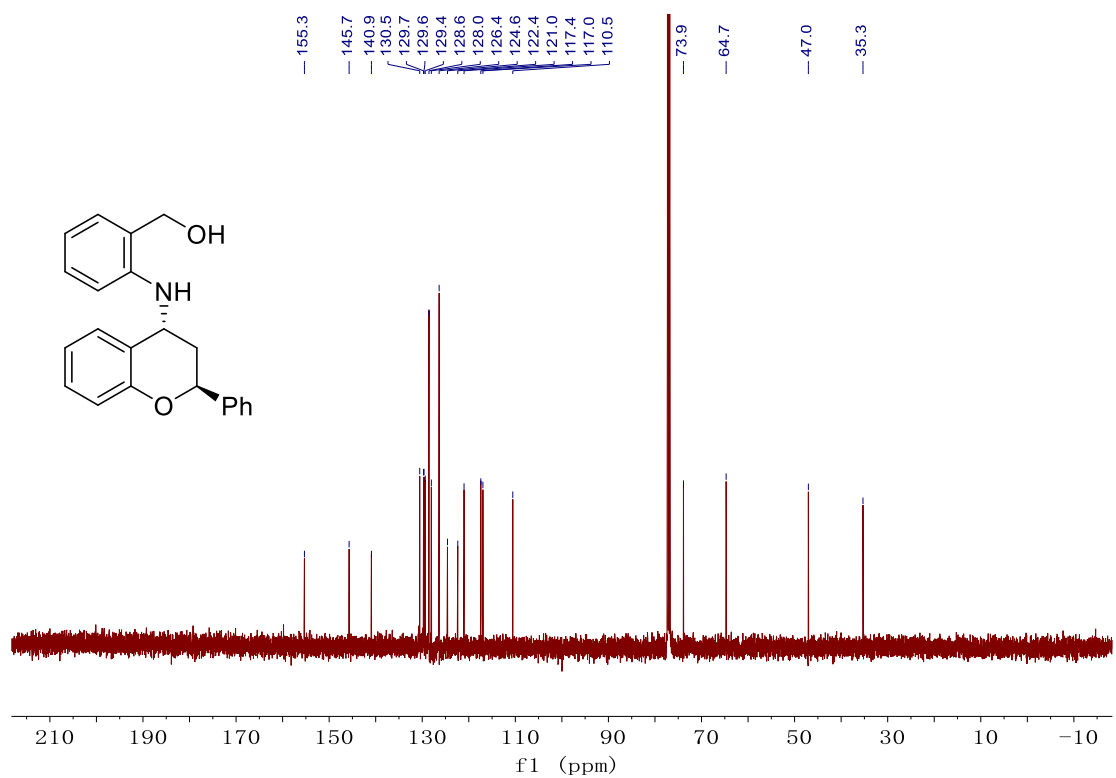

**(2-(((2R,4R)-2-phenylchroman-4-yl)amino)phenyl)methanol (3ka')**

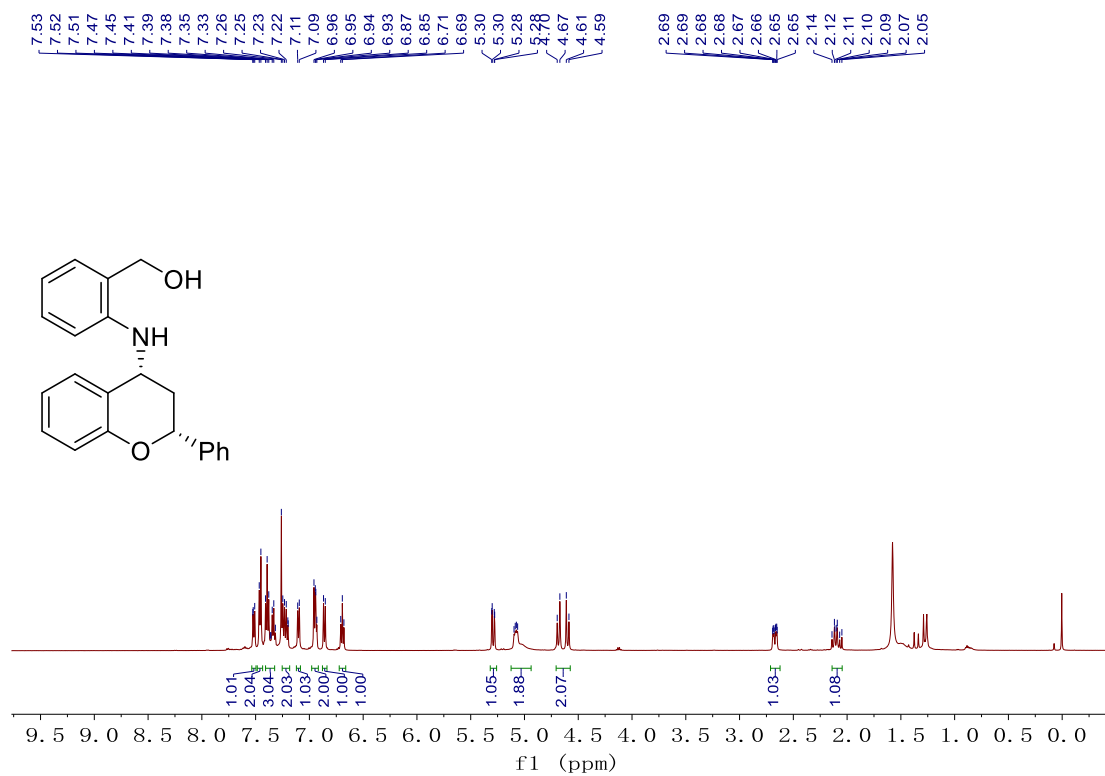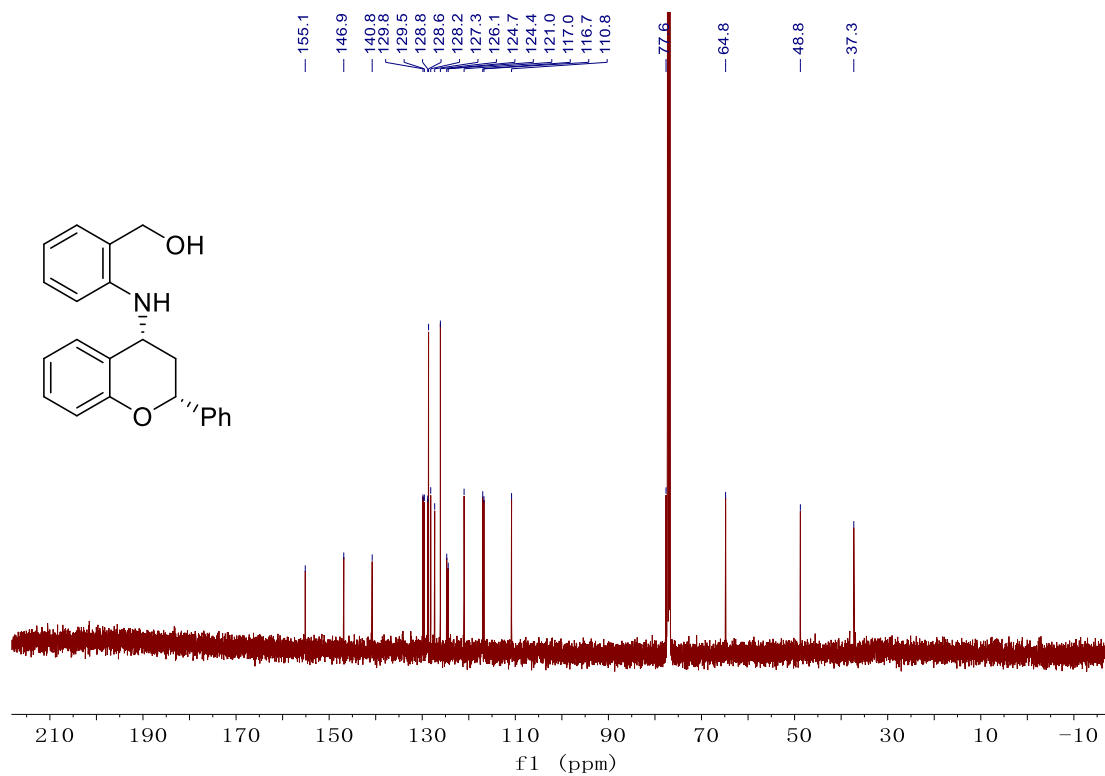

**(2-(((3S,4R)-3-methylchroman-4-yl)amino)phenyl)methanol (31a)**

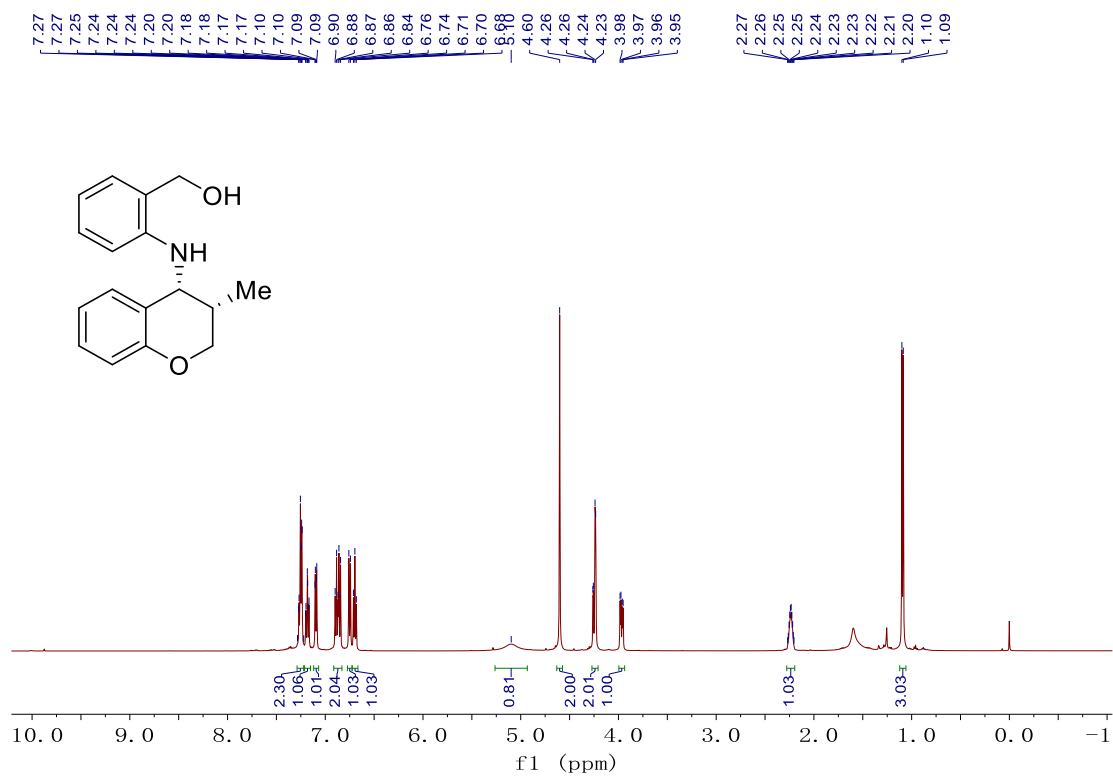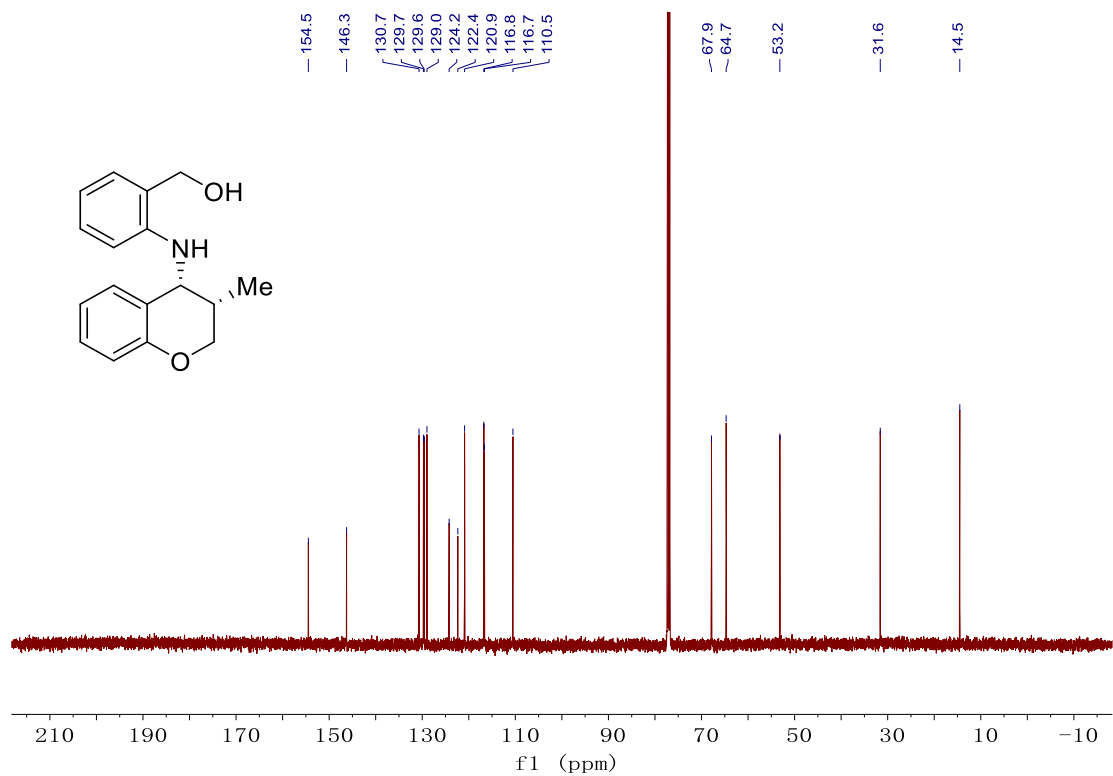

**(2-(((3S,4R)-3-phenylchroman-4-yl)amino)phenyl)methanol (3ma)**

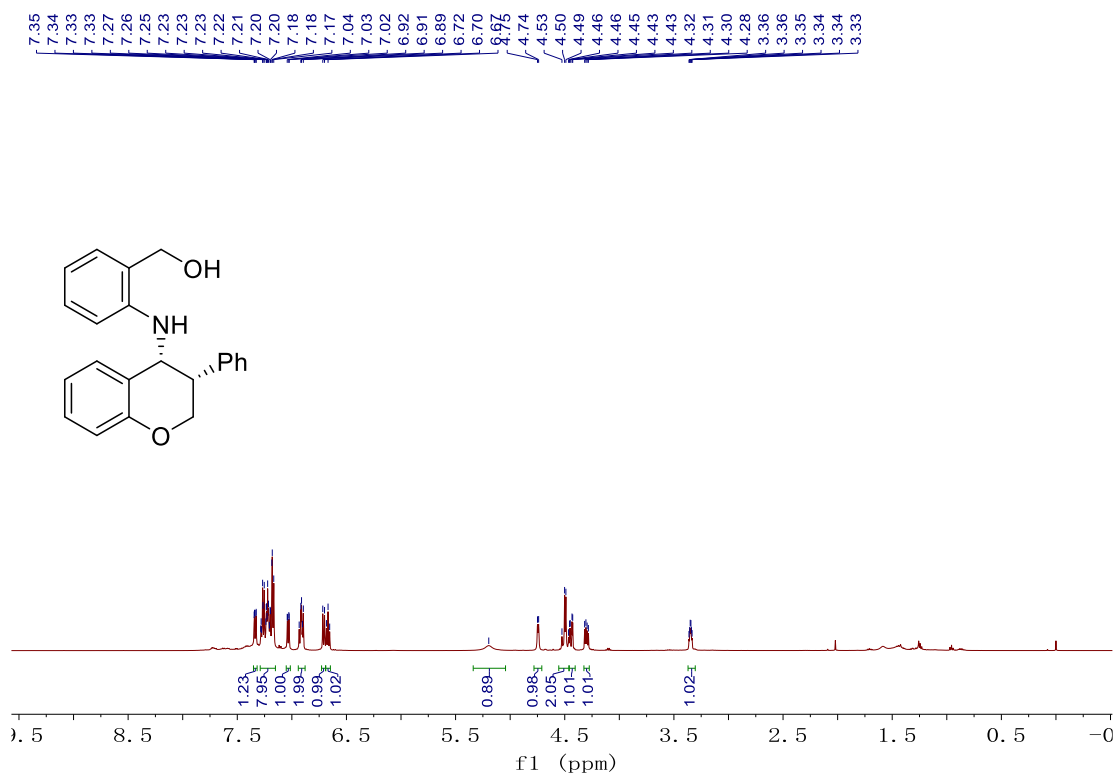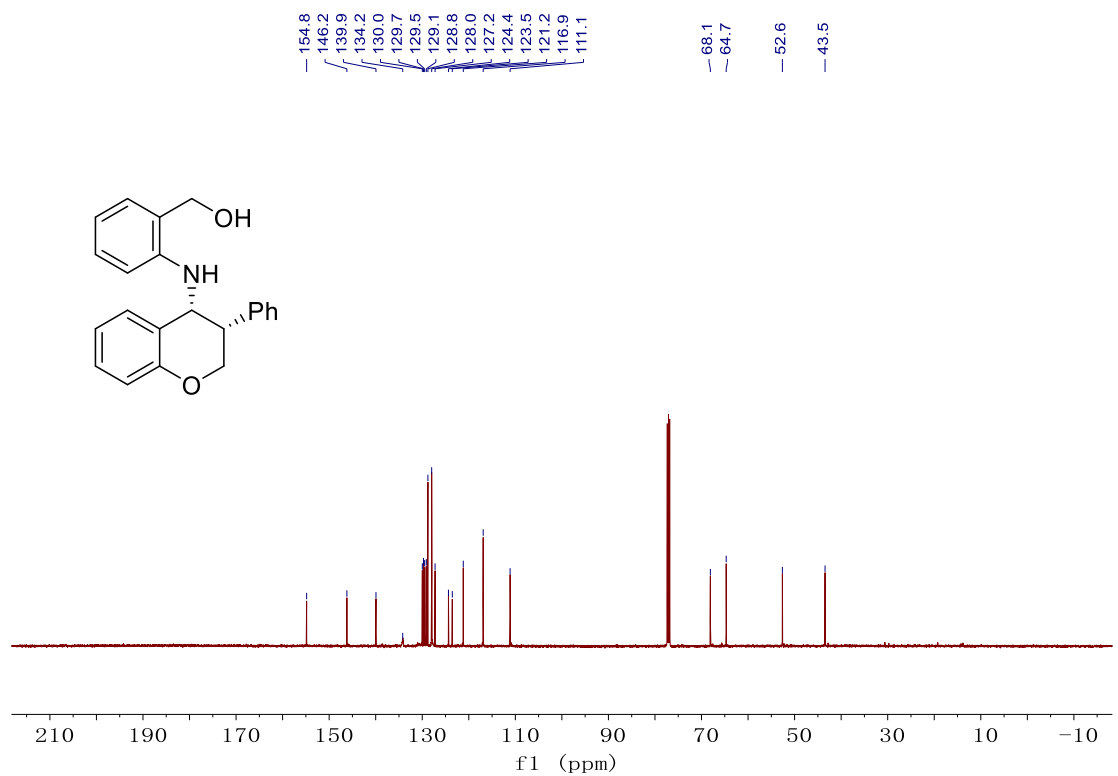

**(R)-2-(chroman-4-ylamino)-5-methoxyphenylmethanol (3ab)**

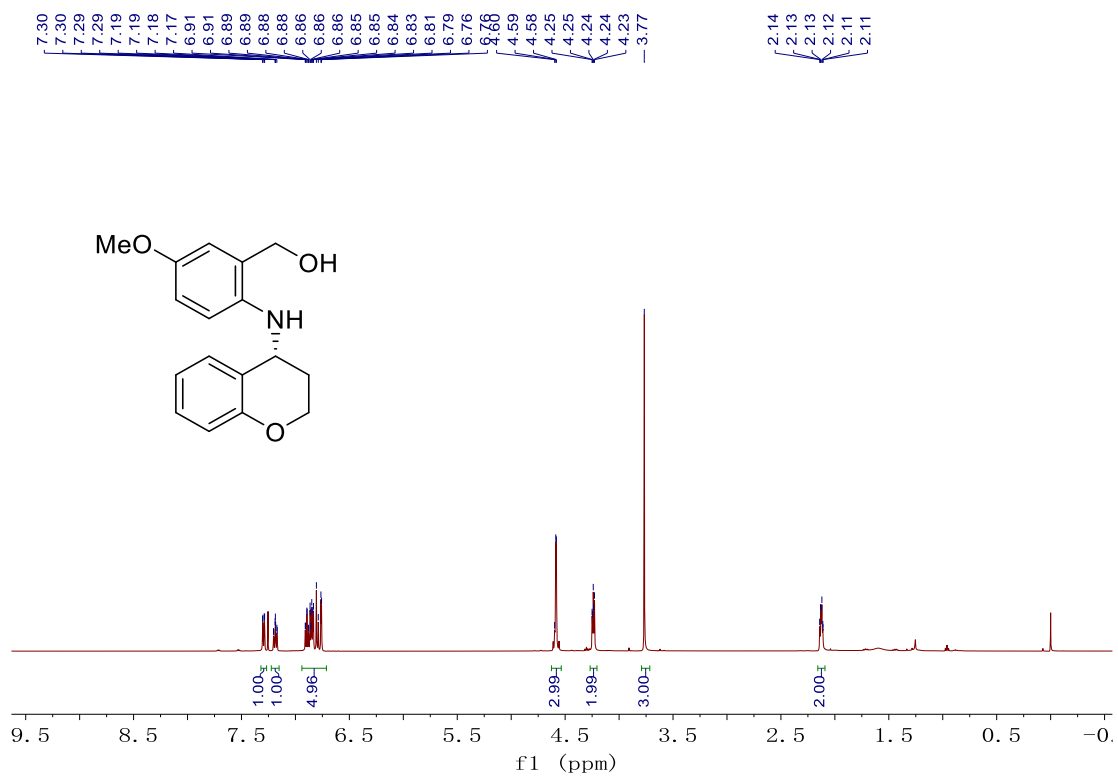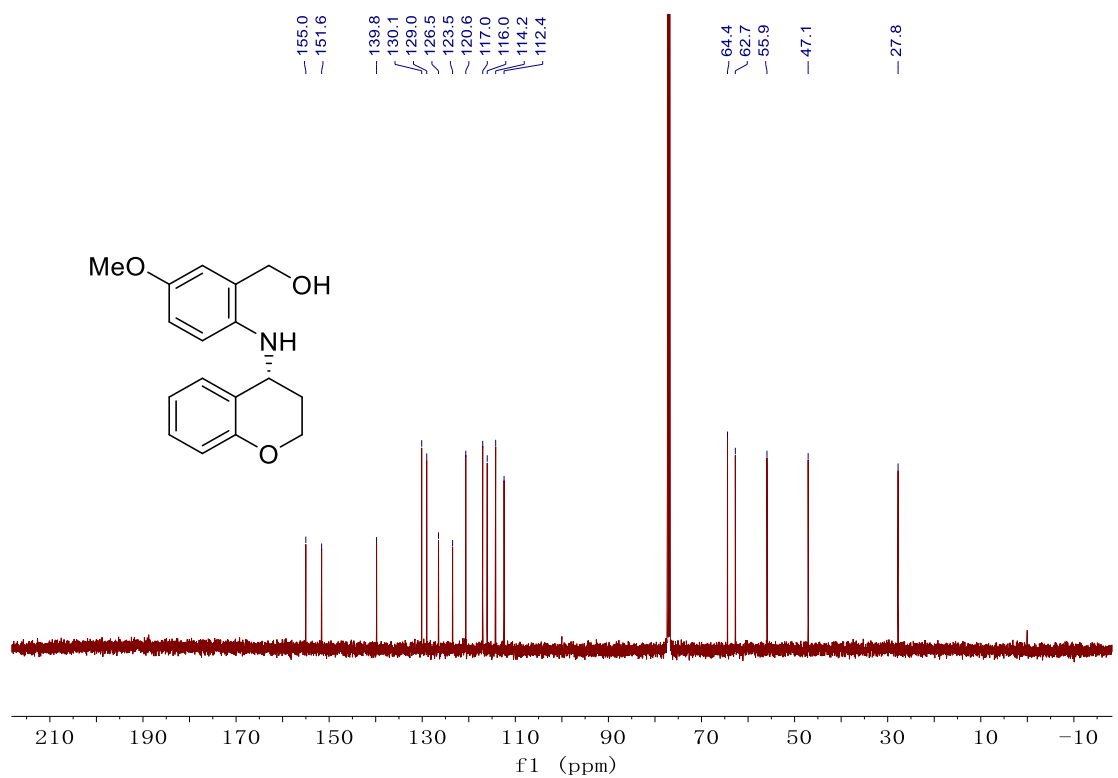

**(R)-4-(chroman-4-ylamino)-3-(hydroxymethyl)phenyl acetate (3ac)**

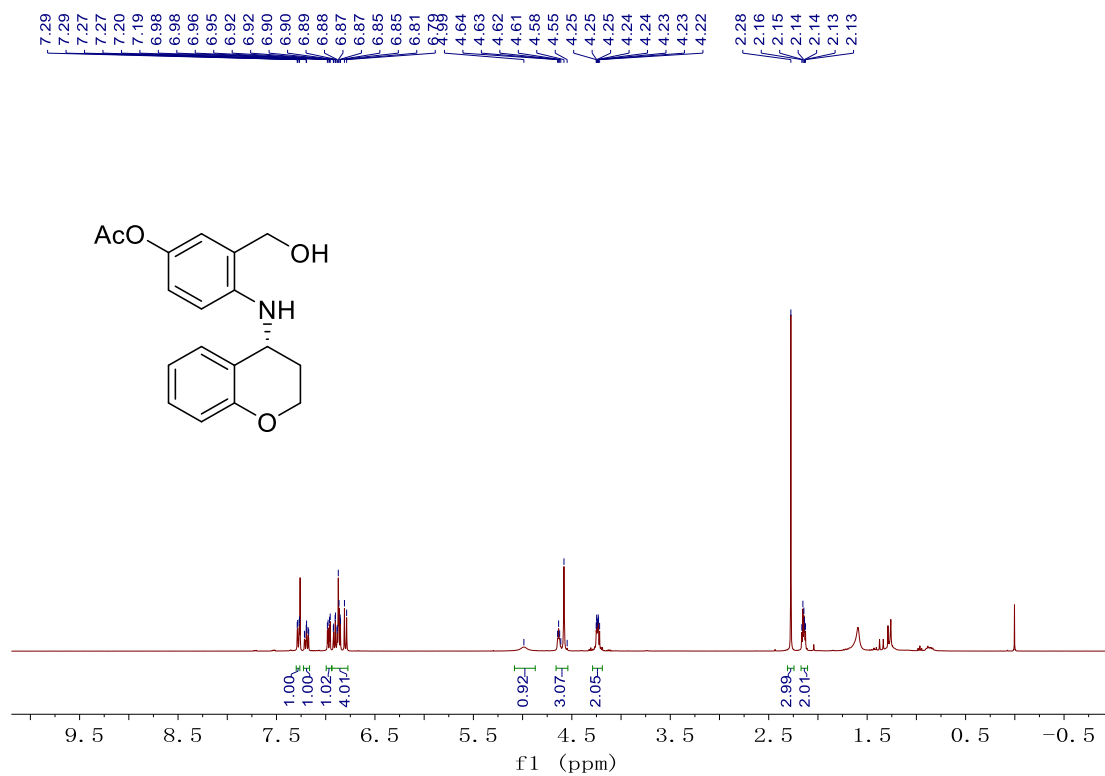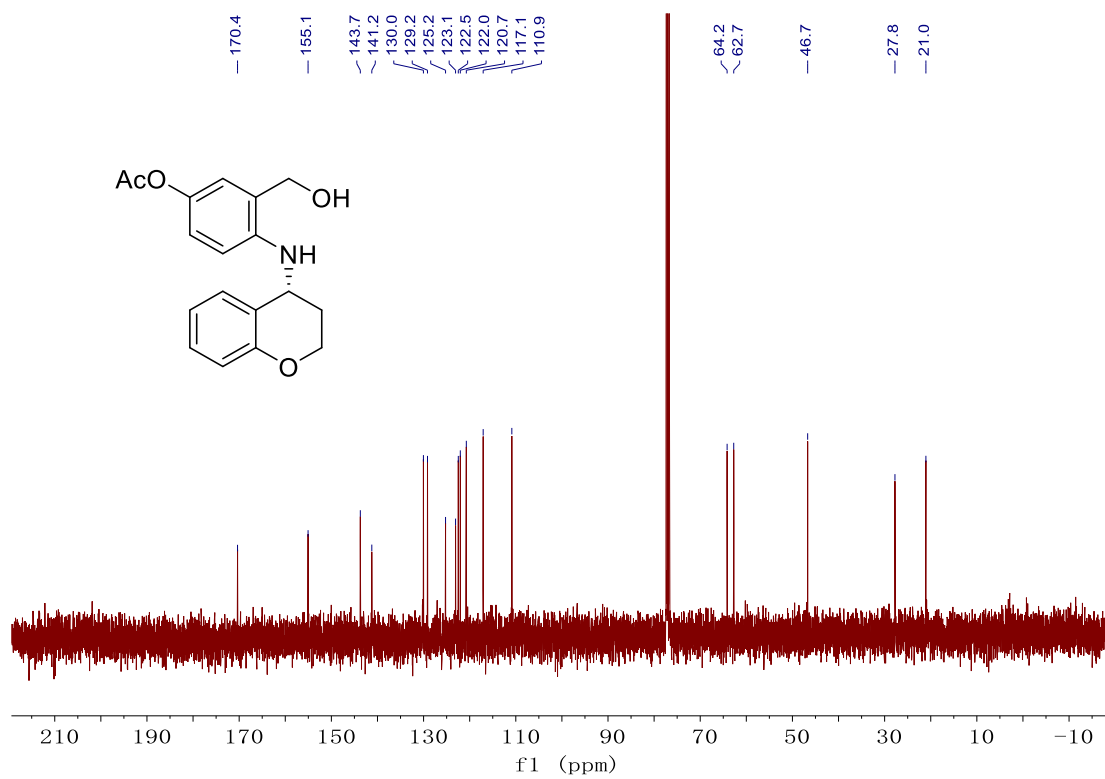

**(R)-2-(chroman-4-ylamino)-5-fluorophenylmethanol (3ad)**



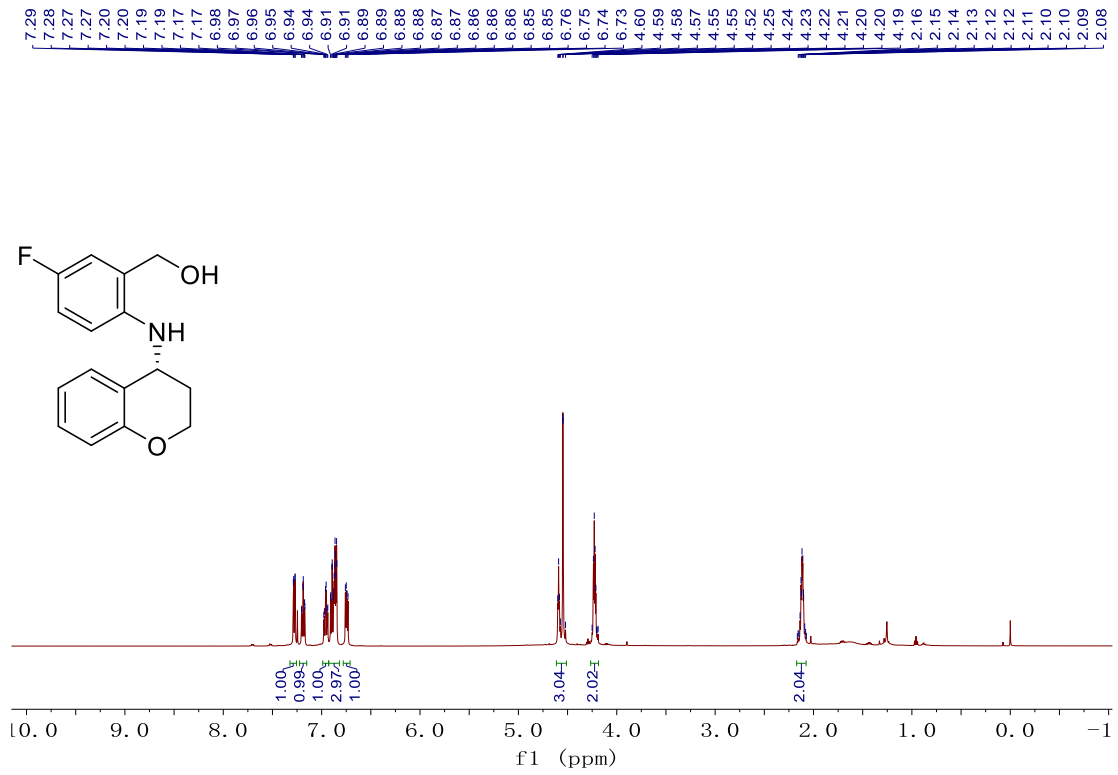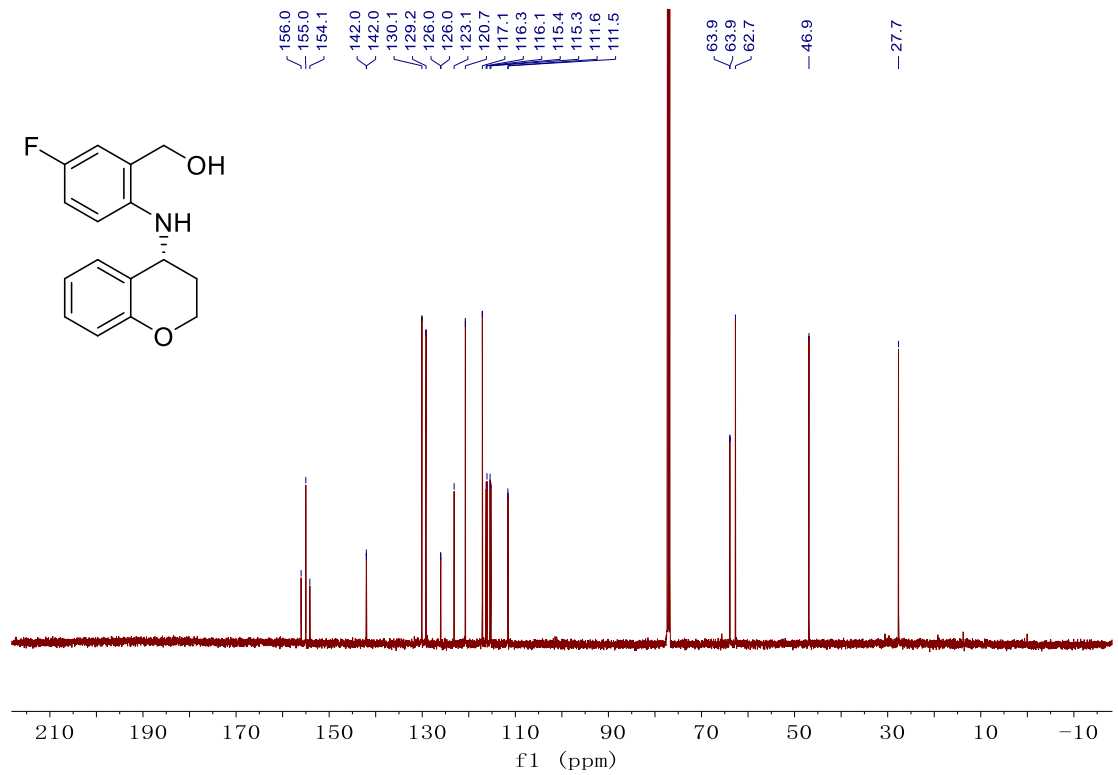

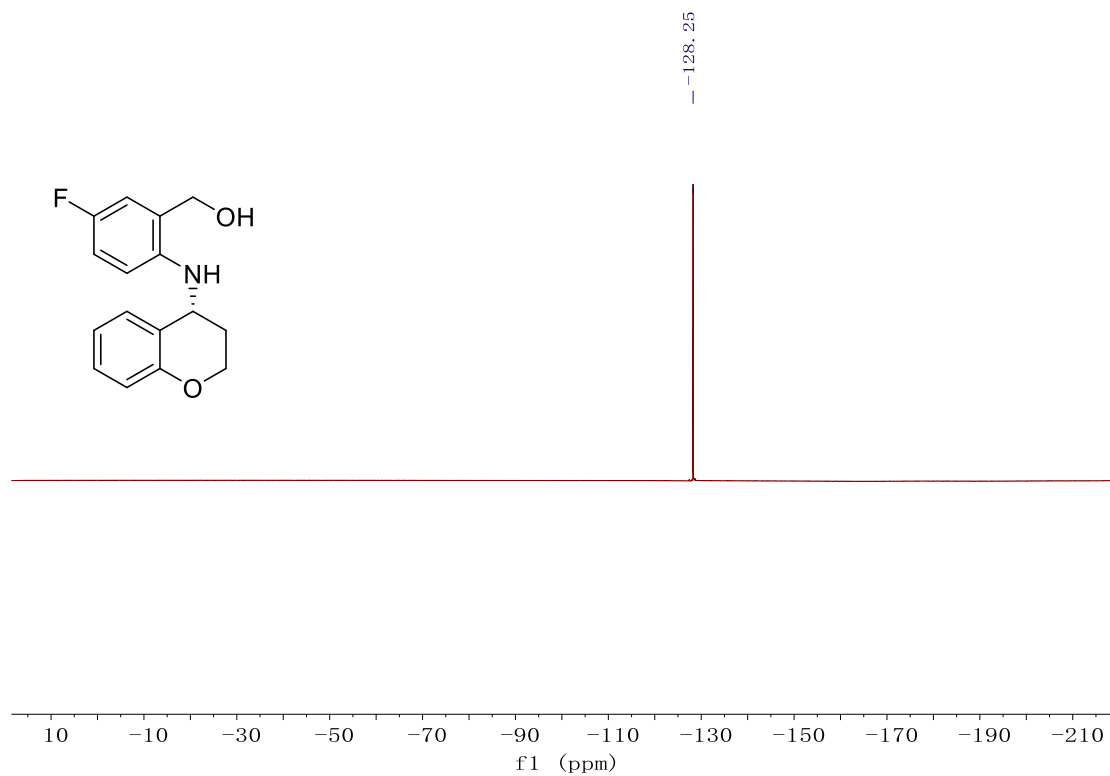

**(R)-5-chloro-2-(chroman-4-ylamino)phenylmethanol (3ae)**

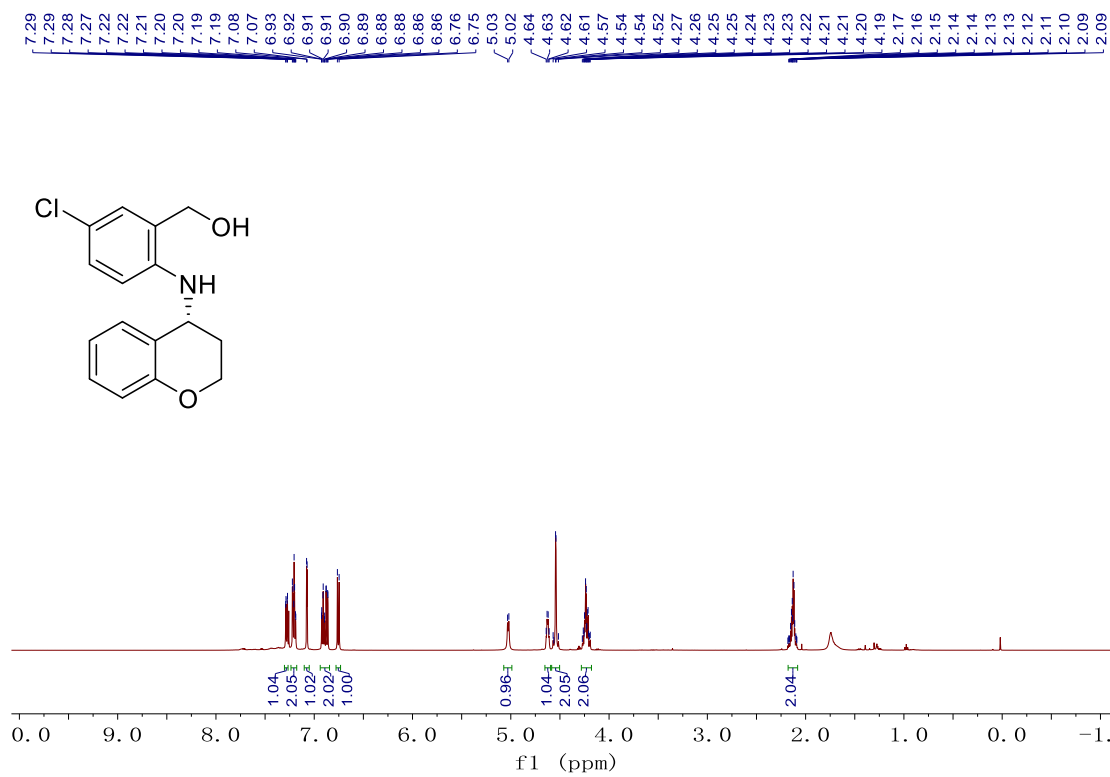

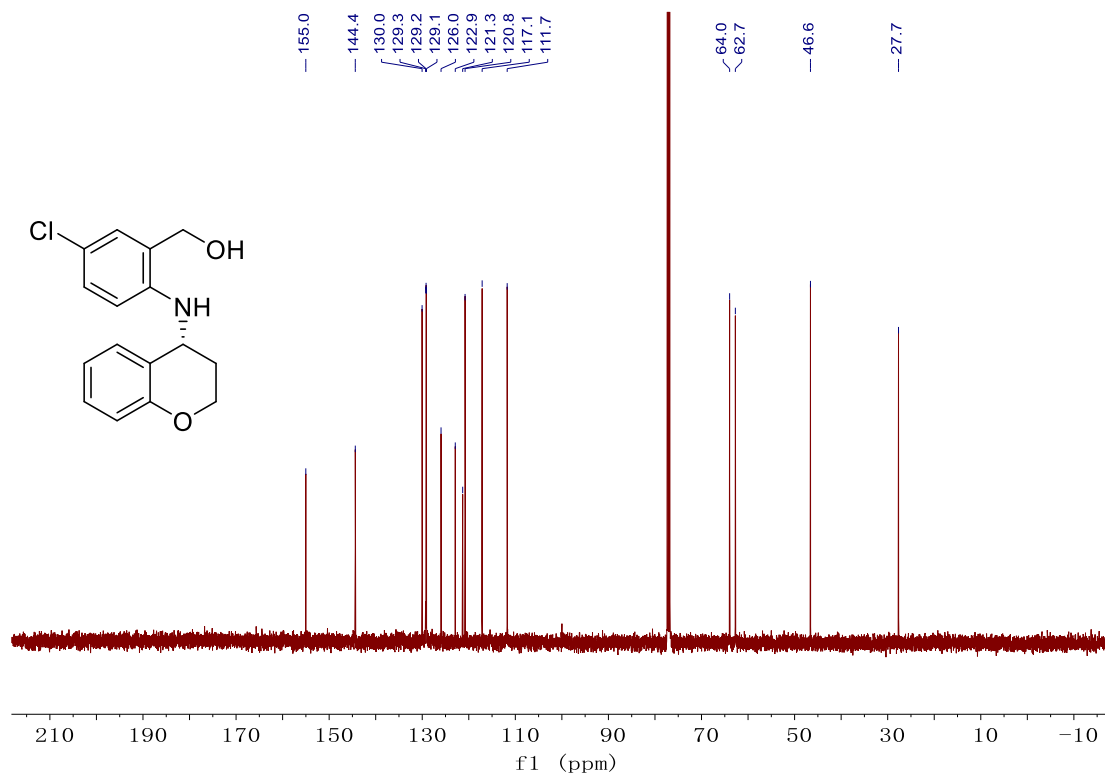

**(R)-5-(5-bromo-2-(chroman-4-ylamino)phenyl)methanol (3af)**

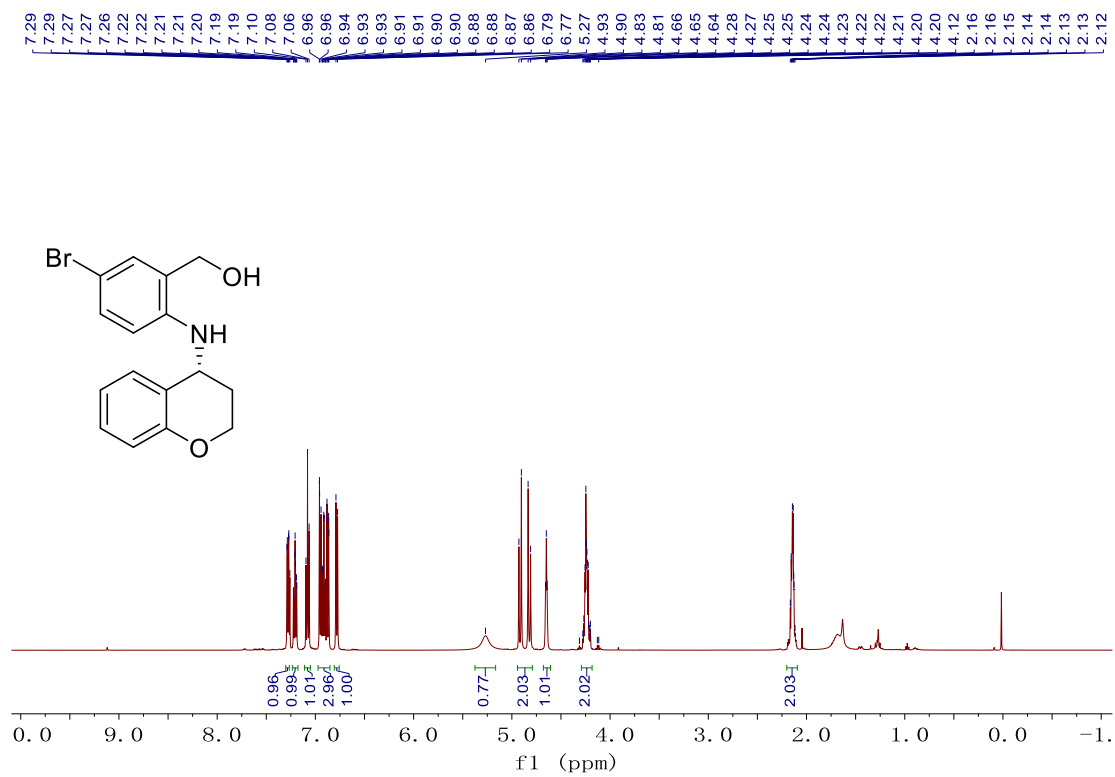

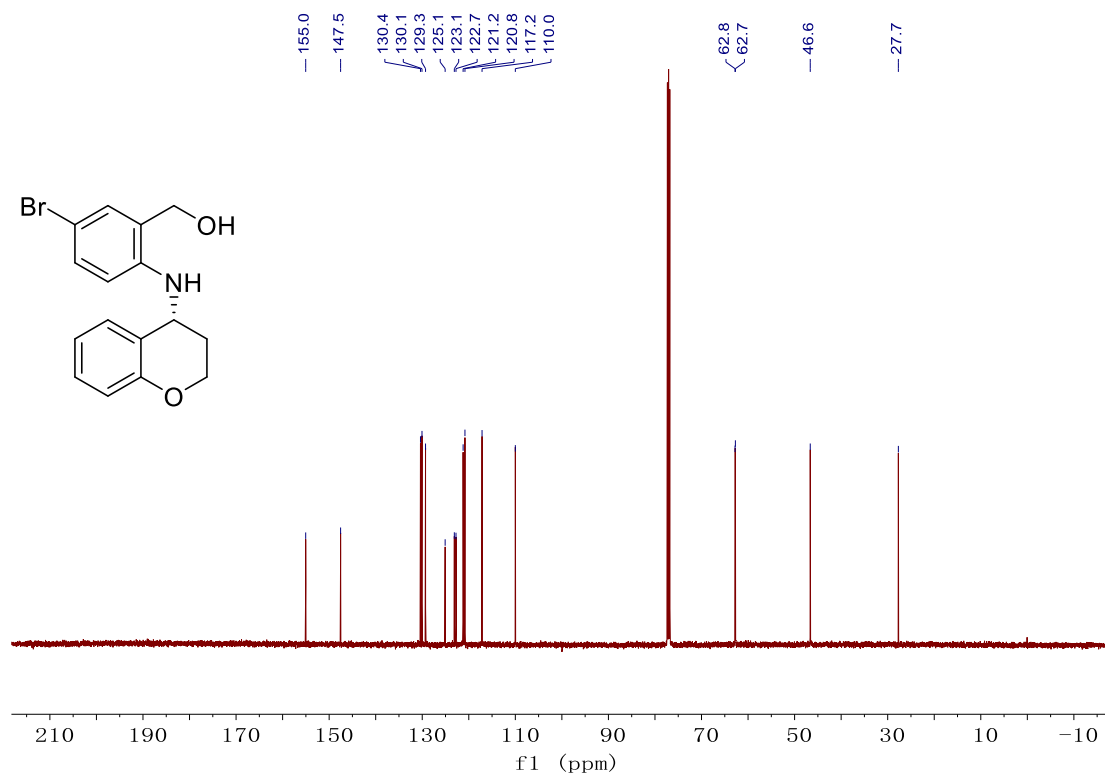

**(R)-2-(chroman-4-ylamino)-4-fluorophenyl)methanol (3ag)**

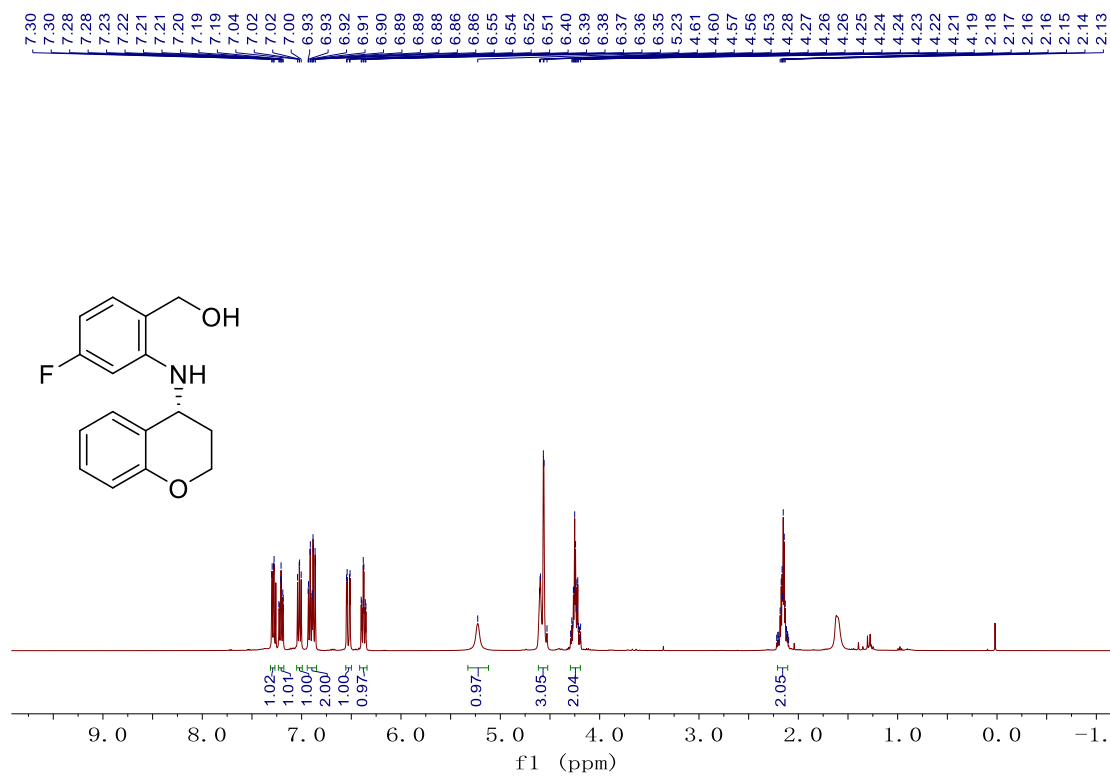

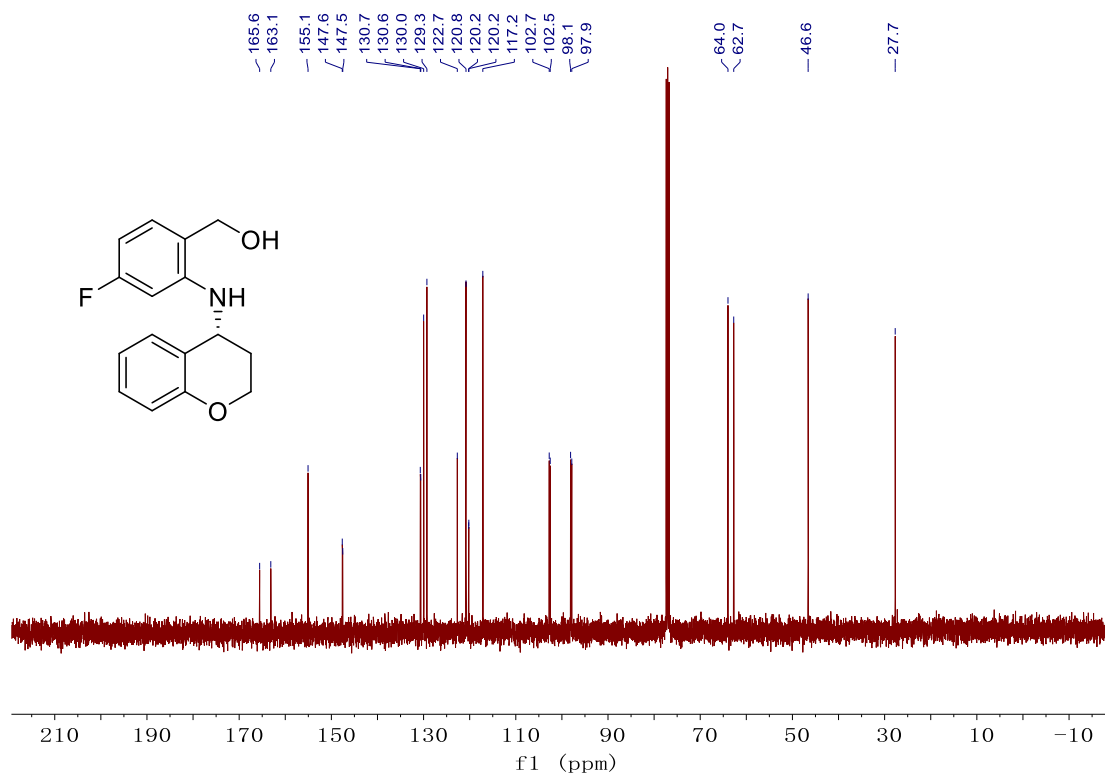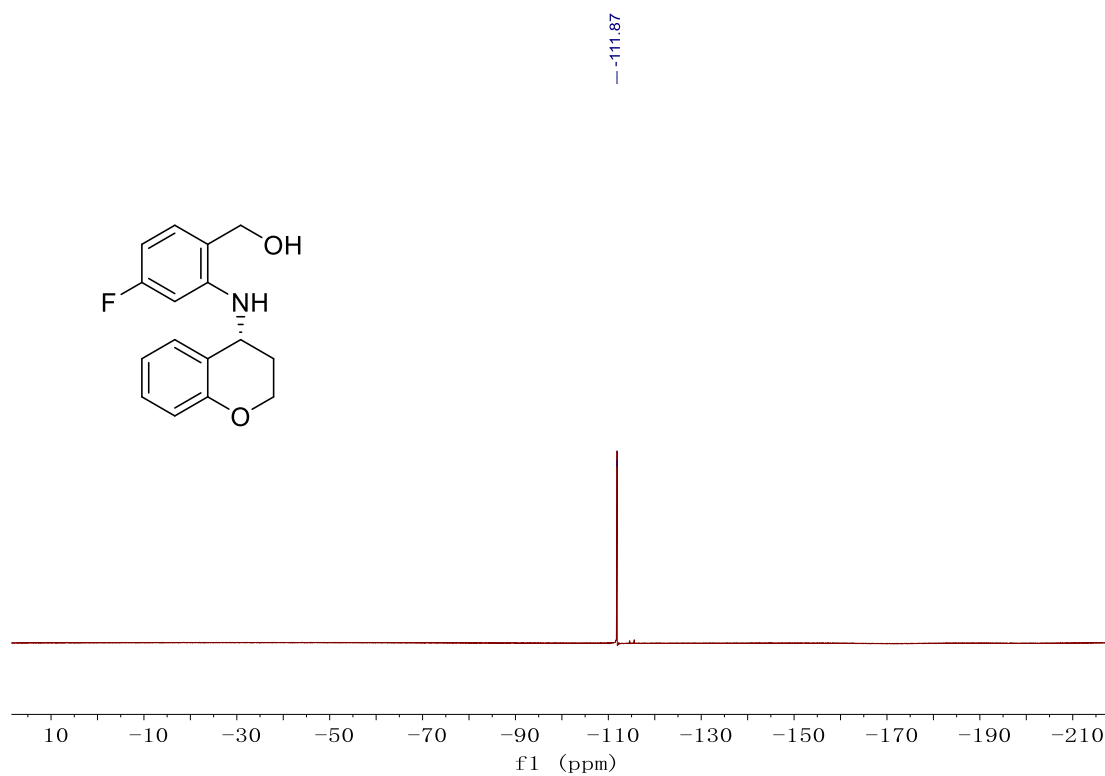

**(R)-4-(4-chloro-2-(chroman-4-ylamino)phenyl)methanol (3ah)**

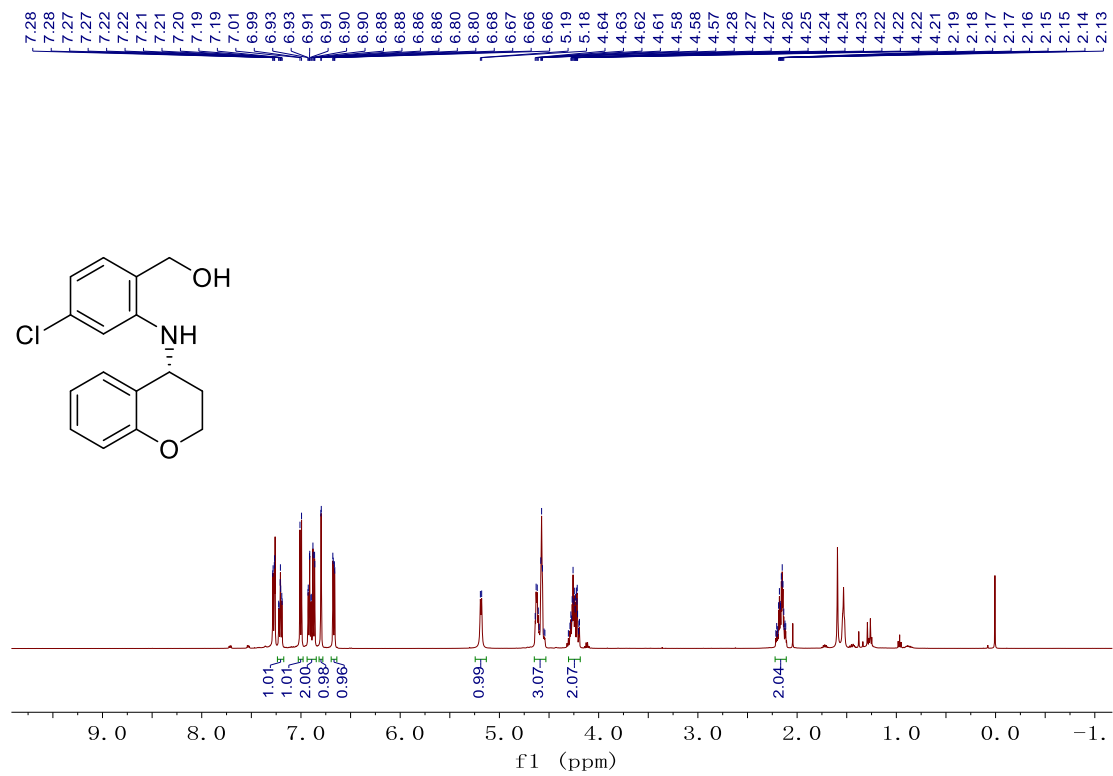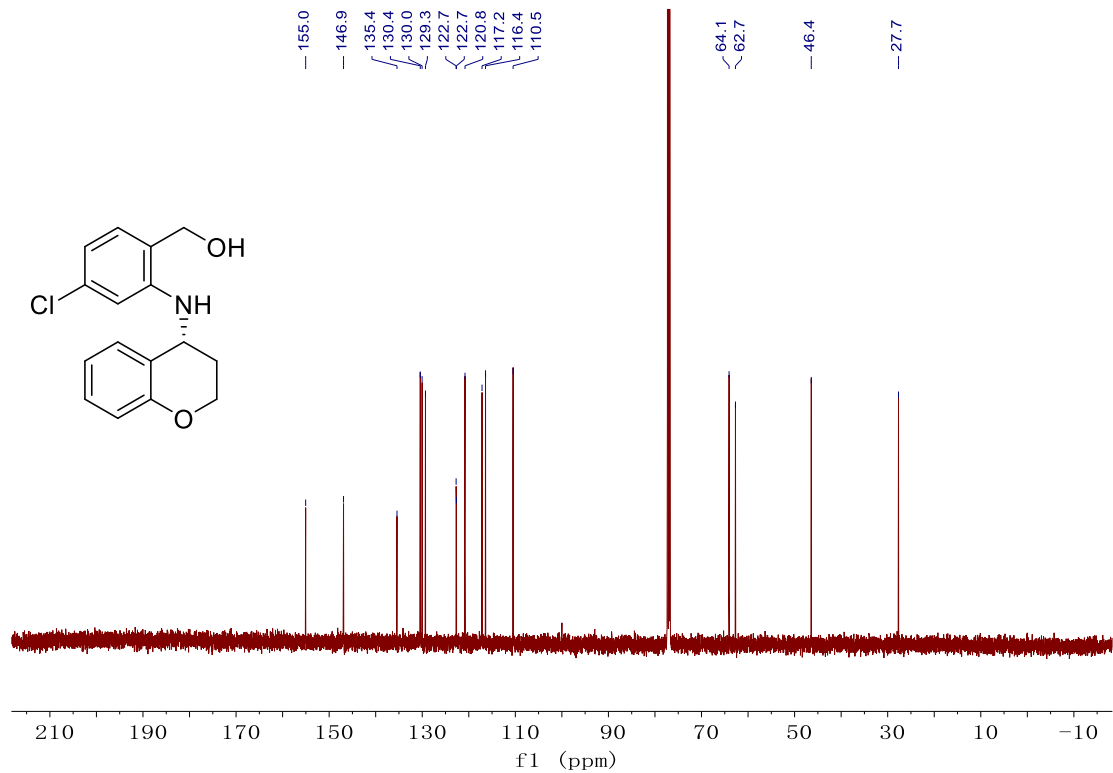

**(R)-4-bromo-2-(chroman-4-ylamino)phenylmethanol (3ai)**

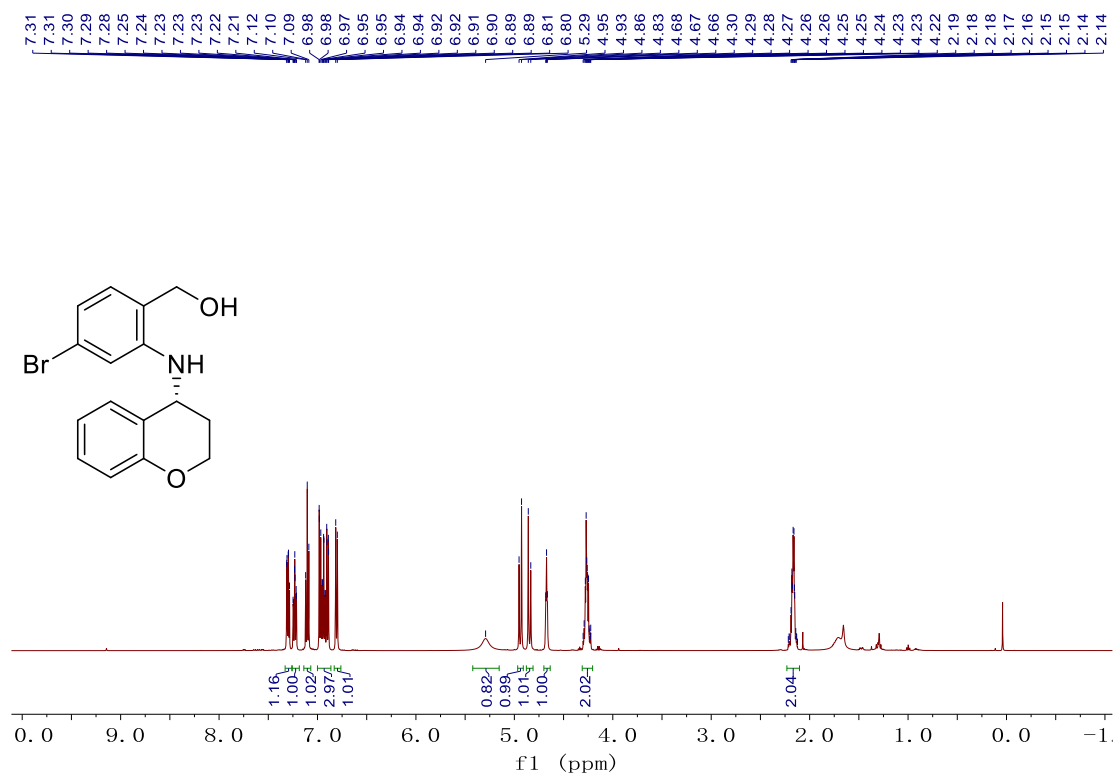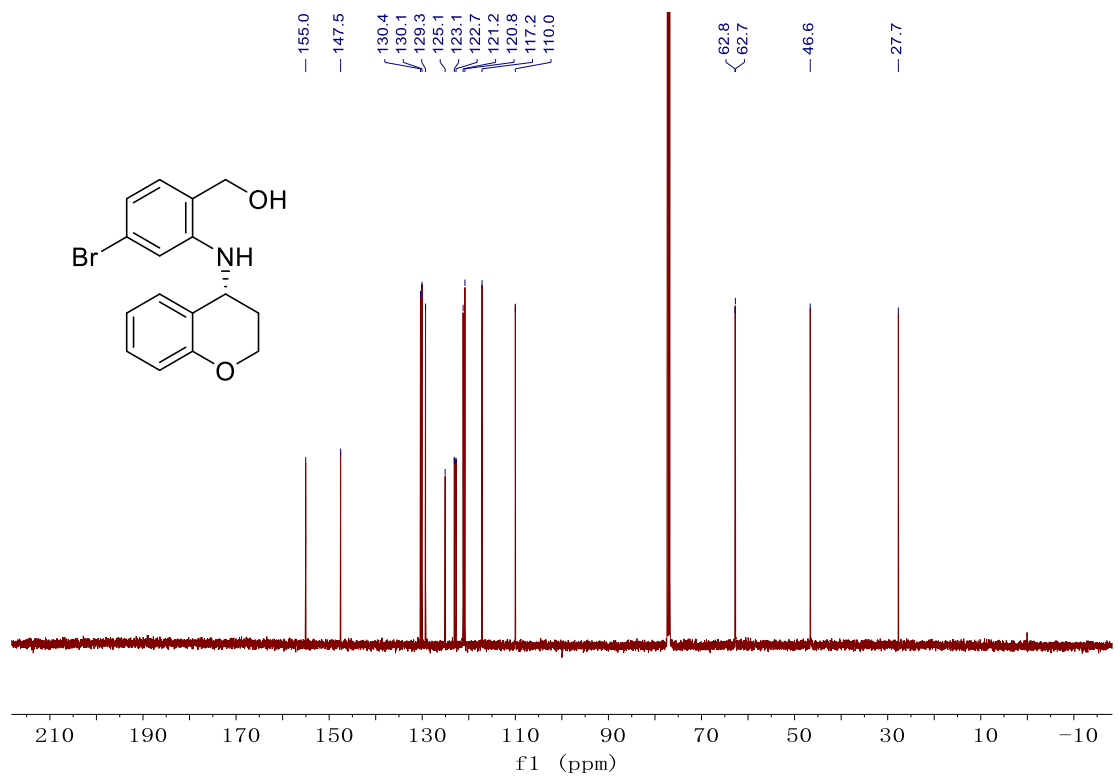

**(R)-2-bromo-6-(chroman-4-ylamino)phenylmethanol (3aj)**

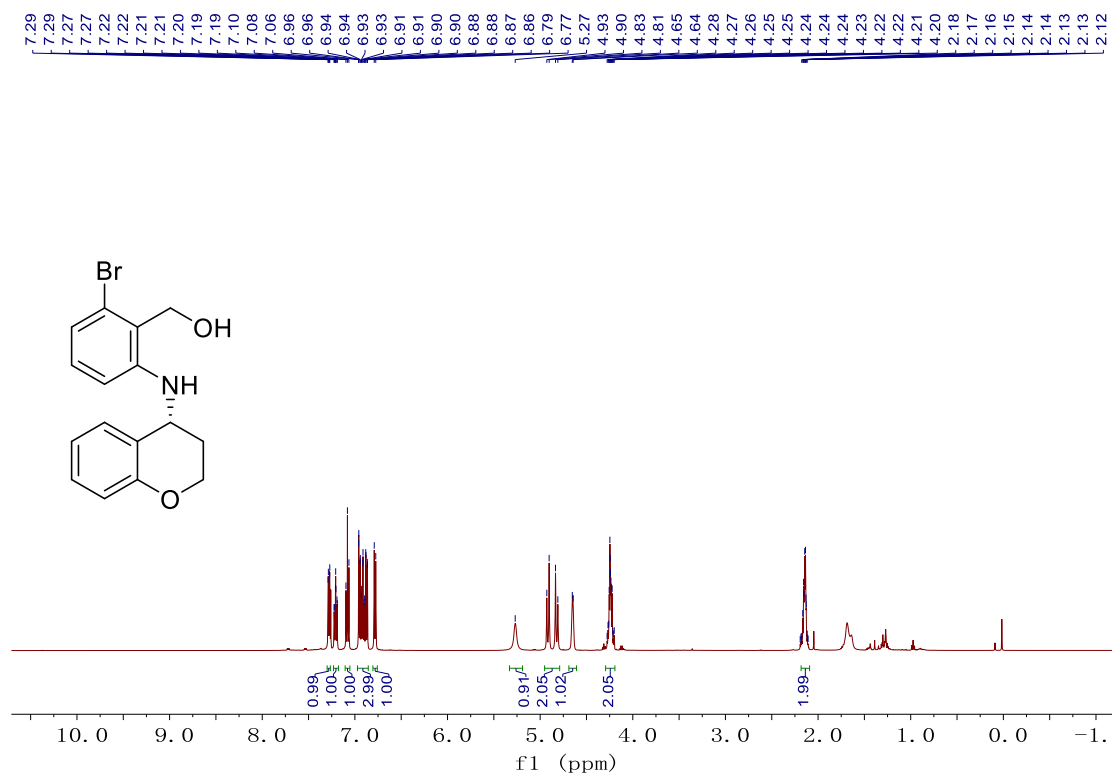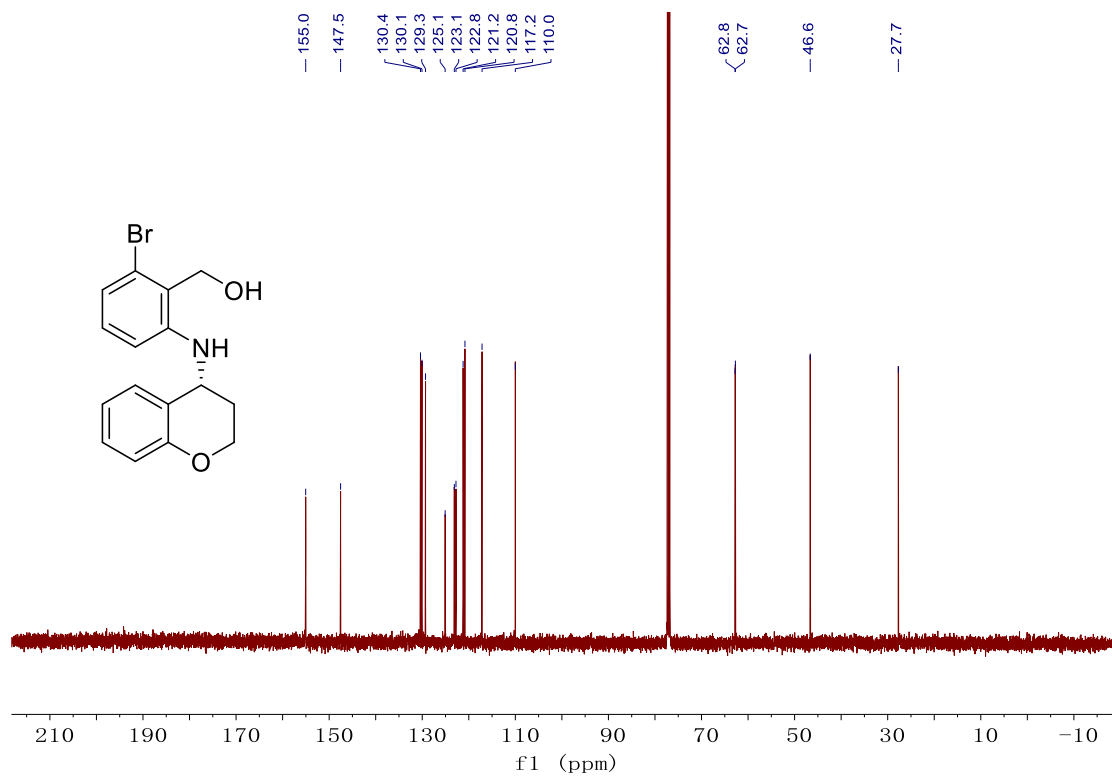

**(R)-(2-(chroman-4-ylamino)-4,5-dimethoxyphenyl)methanol (3ak)**



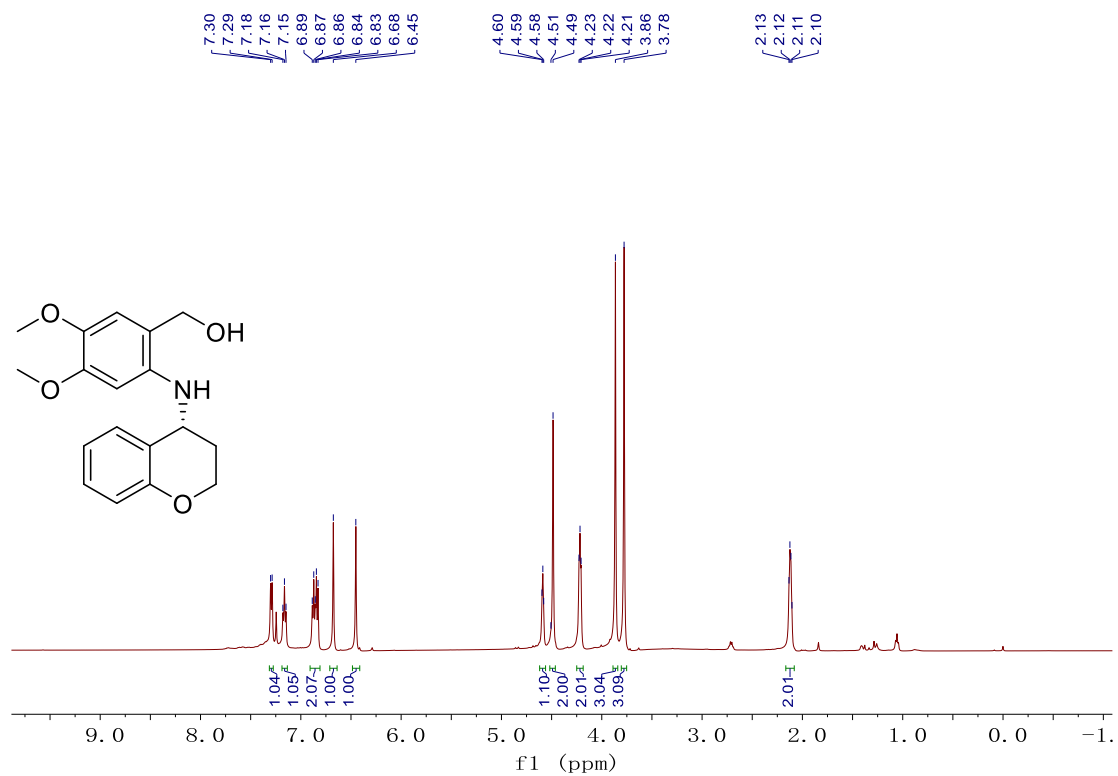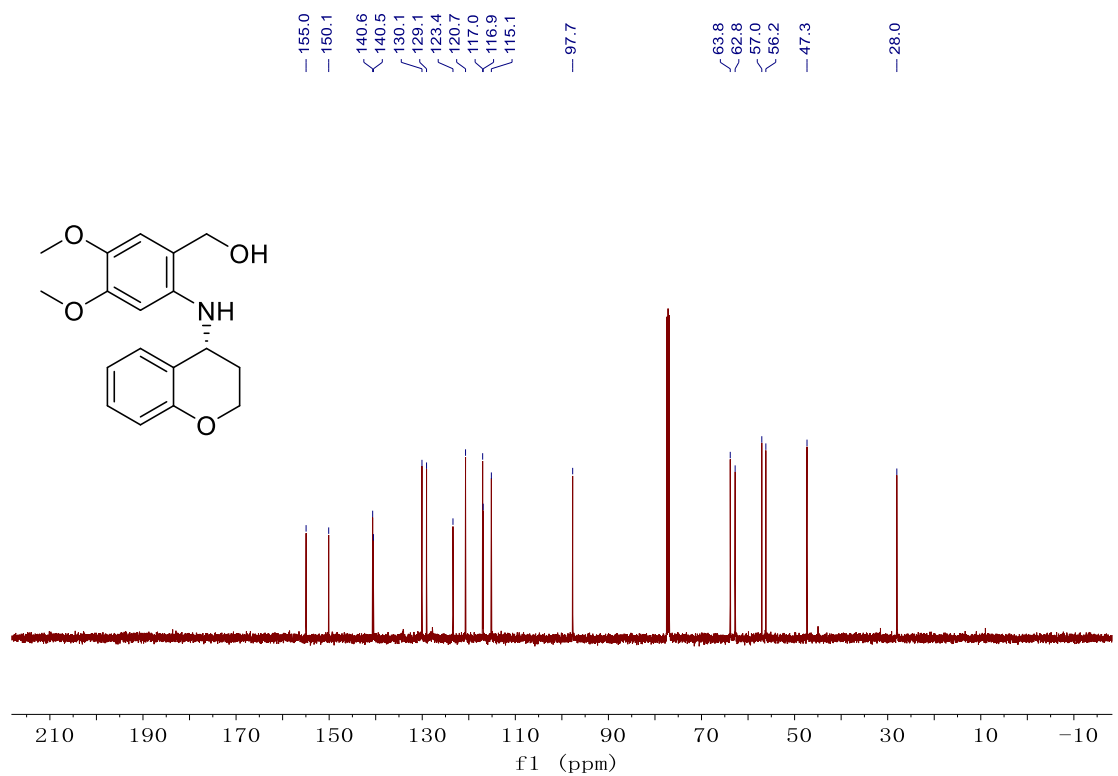

**(R)-4-bromo-2-(chroman-4-ylamino)phenylmethanol (3al)**

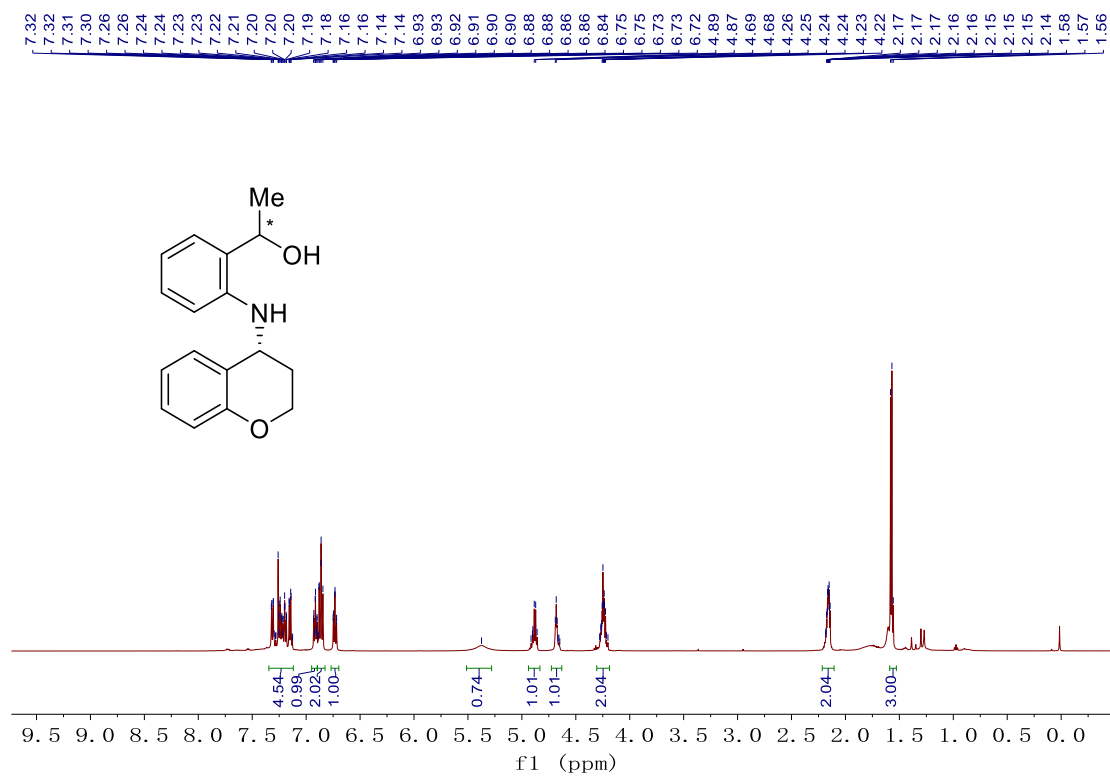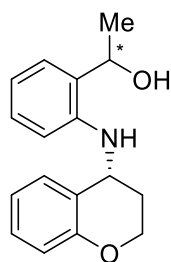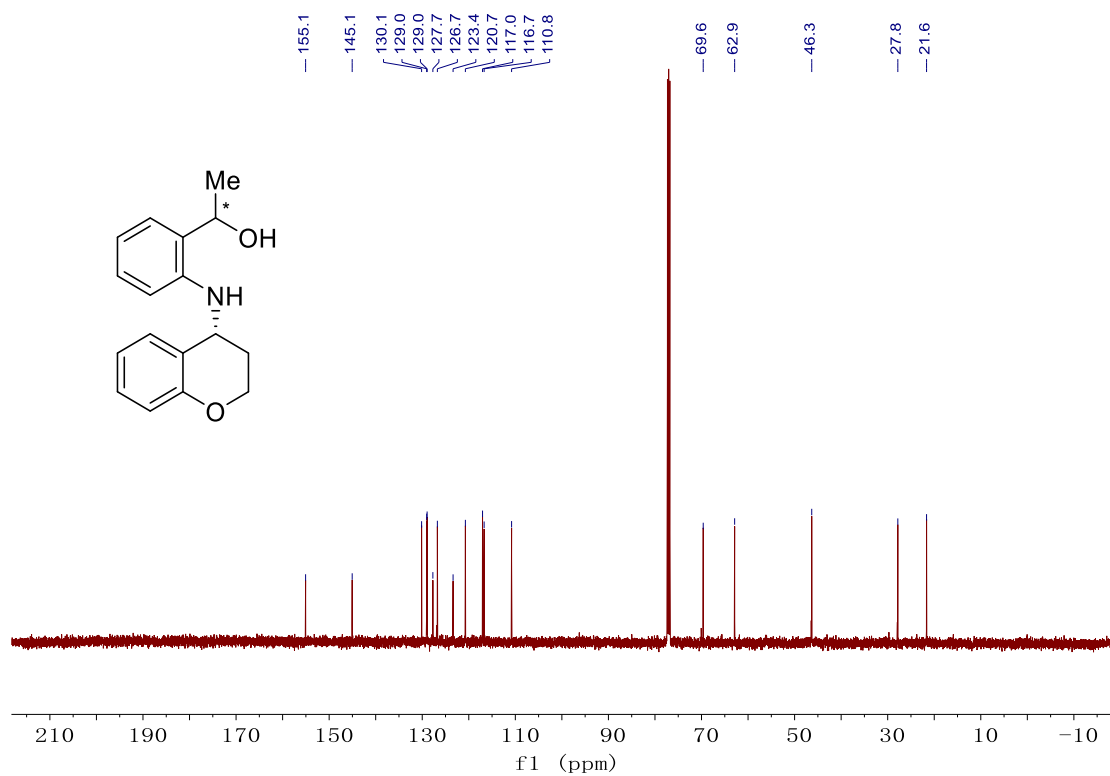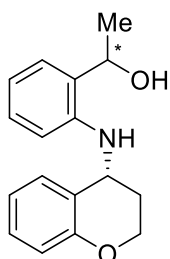

**(4-chloro-2-(((*R*)-chroman-4-yl)amino)phenyl)(phenyl)methanol (3am)**

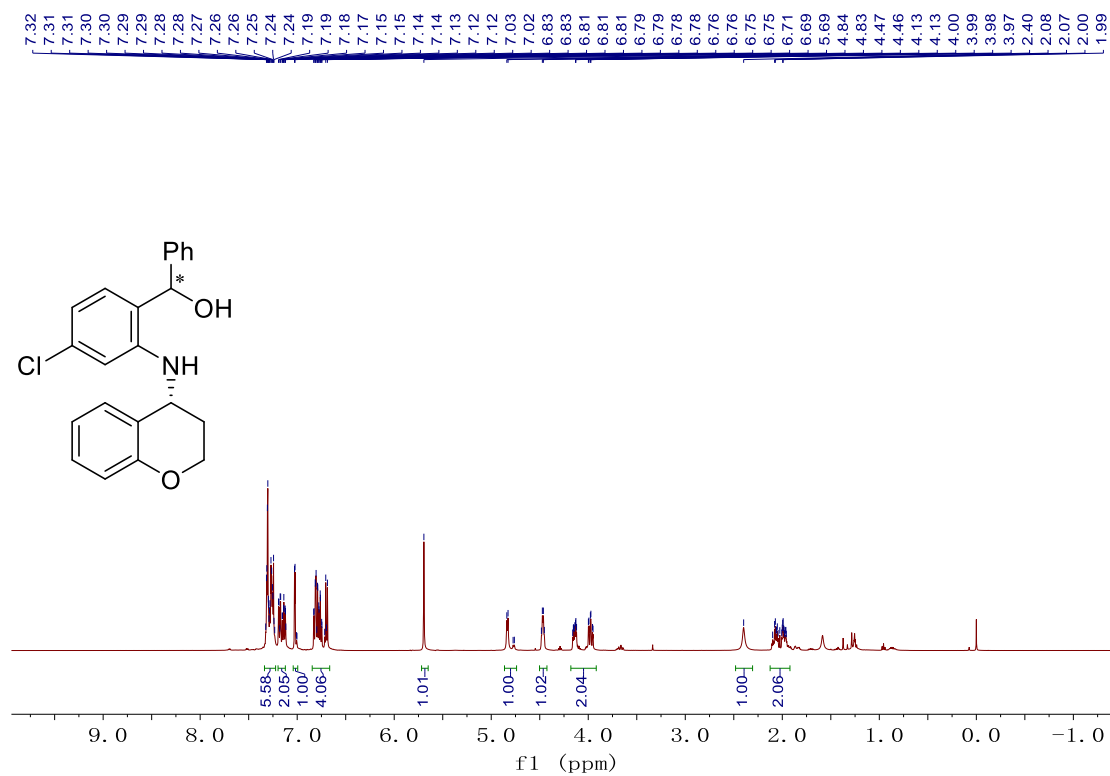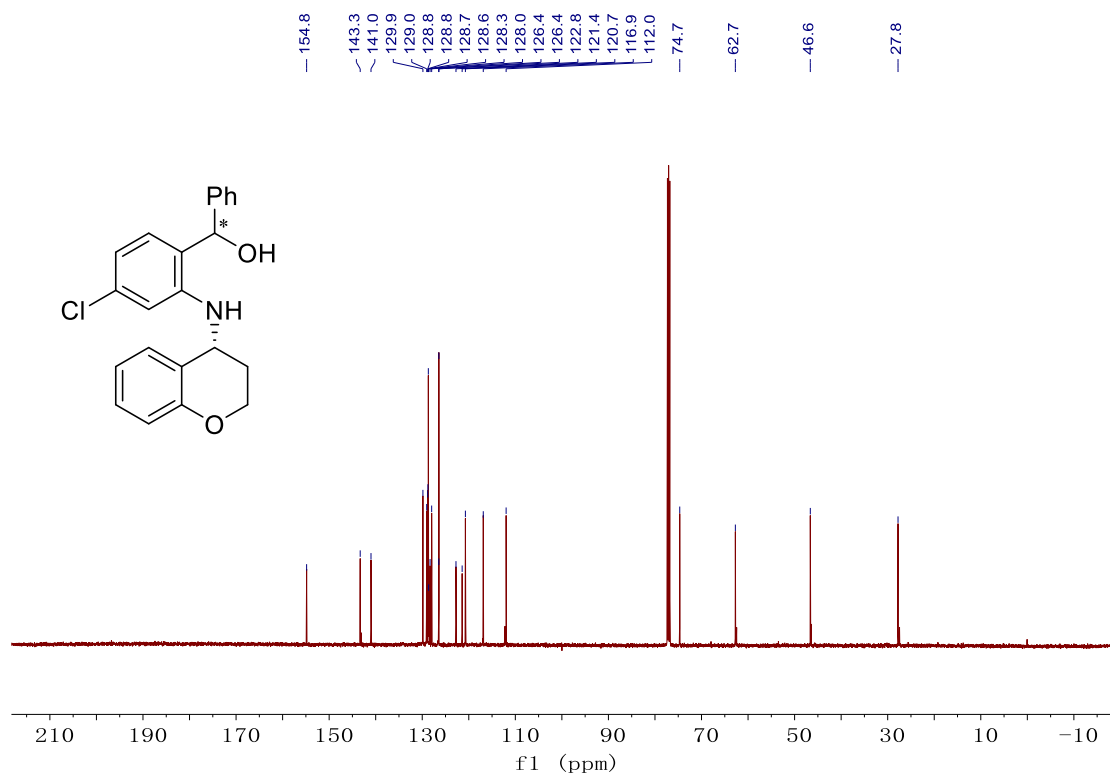

**(R)-1-(2-(chroman-4-ylamino)phenyl)ethan-1-one (3al')**

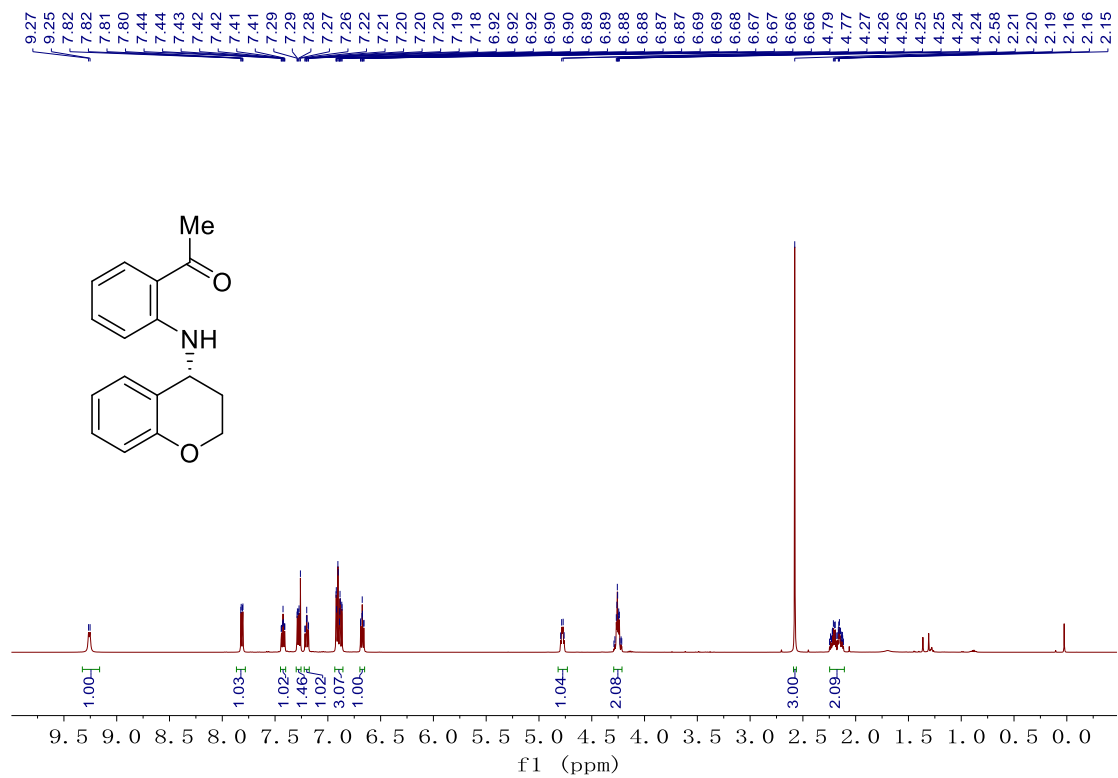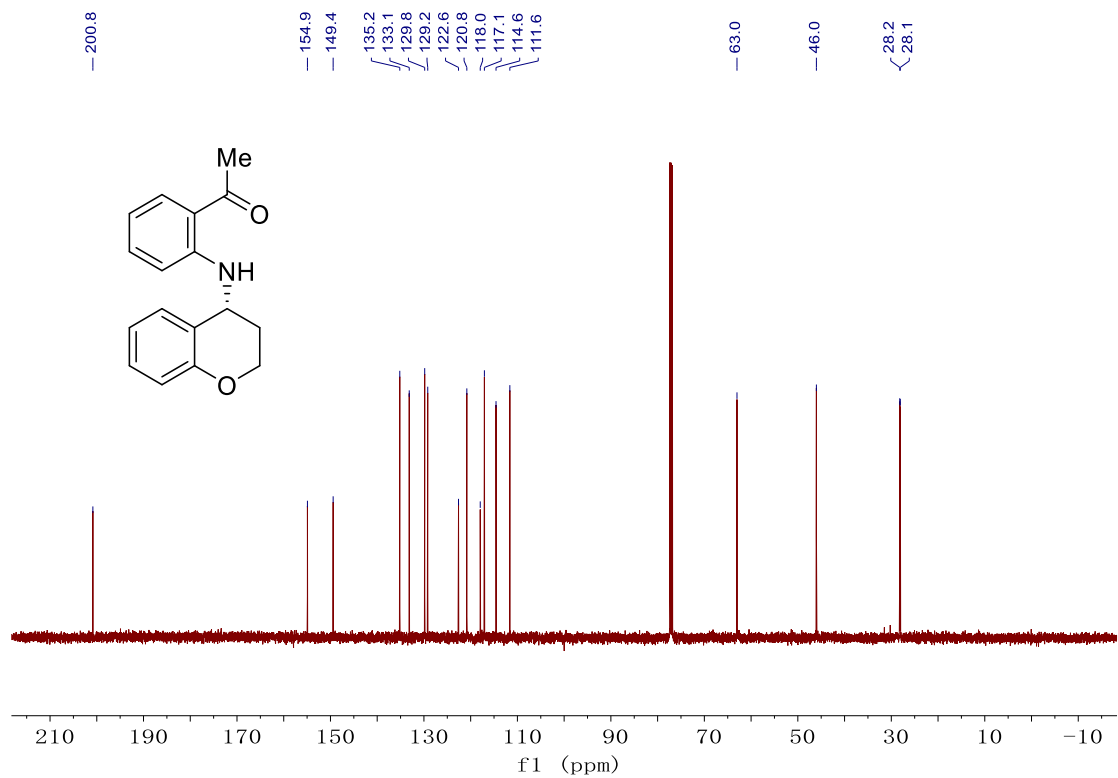

**(R)-4-chloro-2-(chroman-4-ylamino)phenyl(methyl)ketone (3am')**

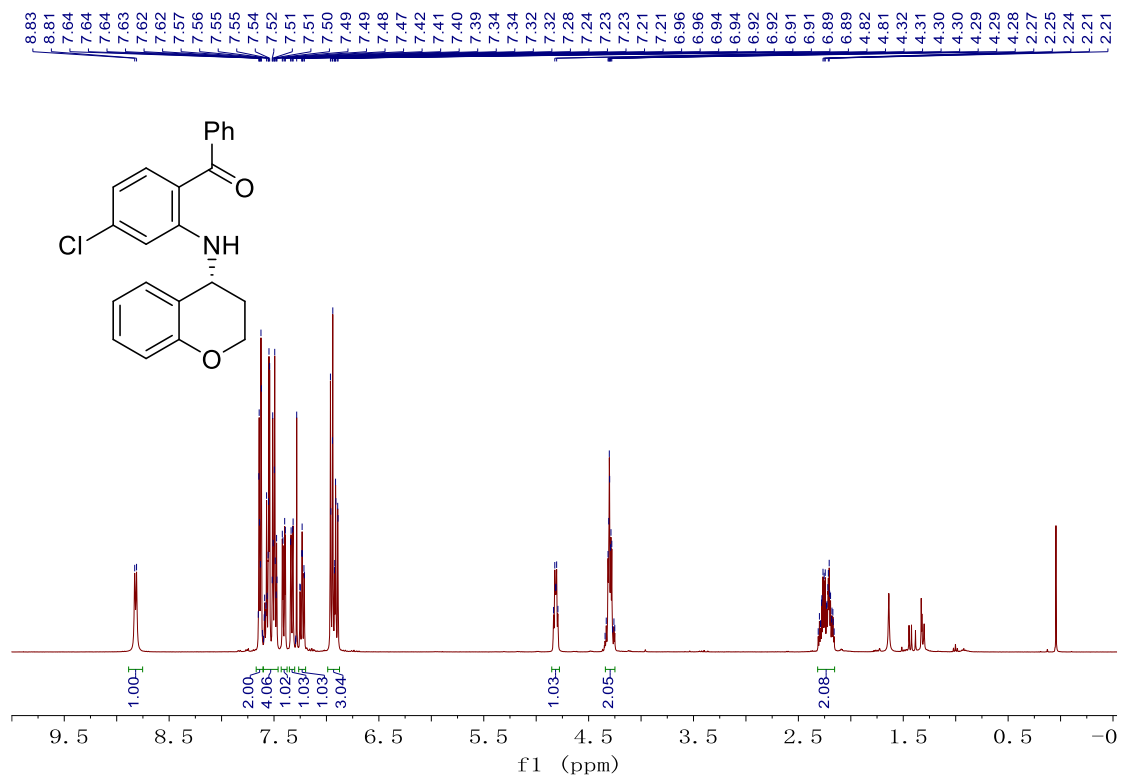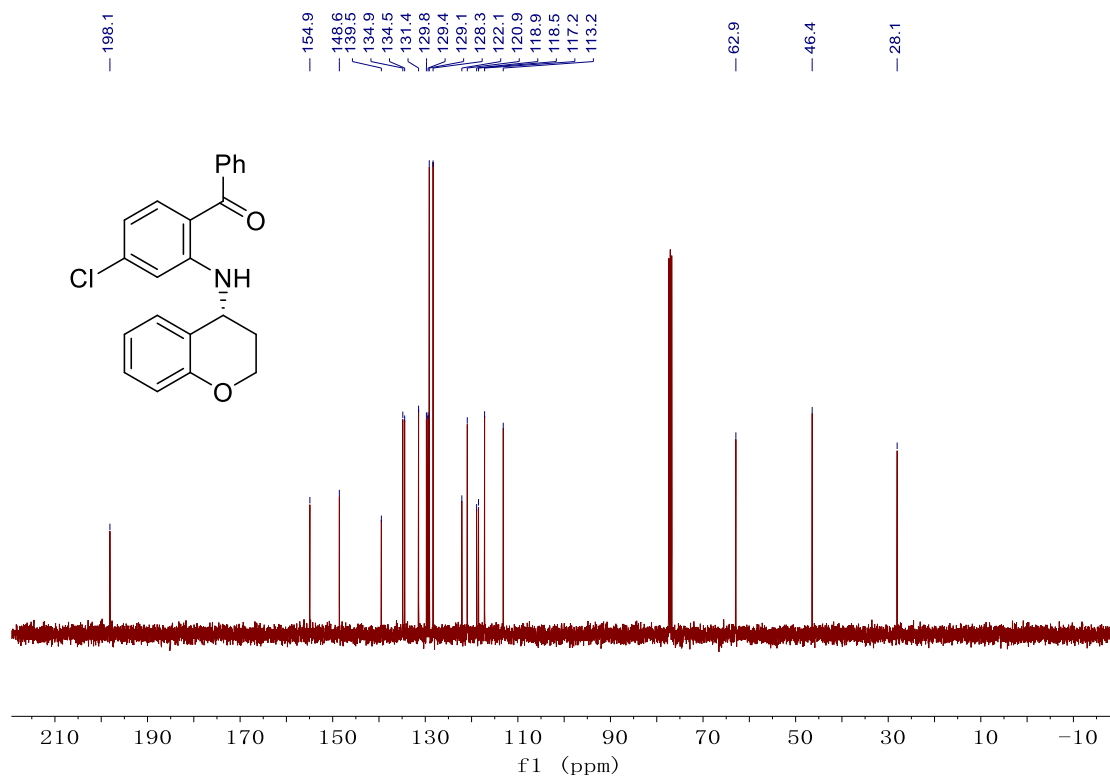

**(R)-2-(2-(thiochroman-4-ylamino)phenyl)methanol (3na)**

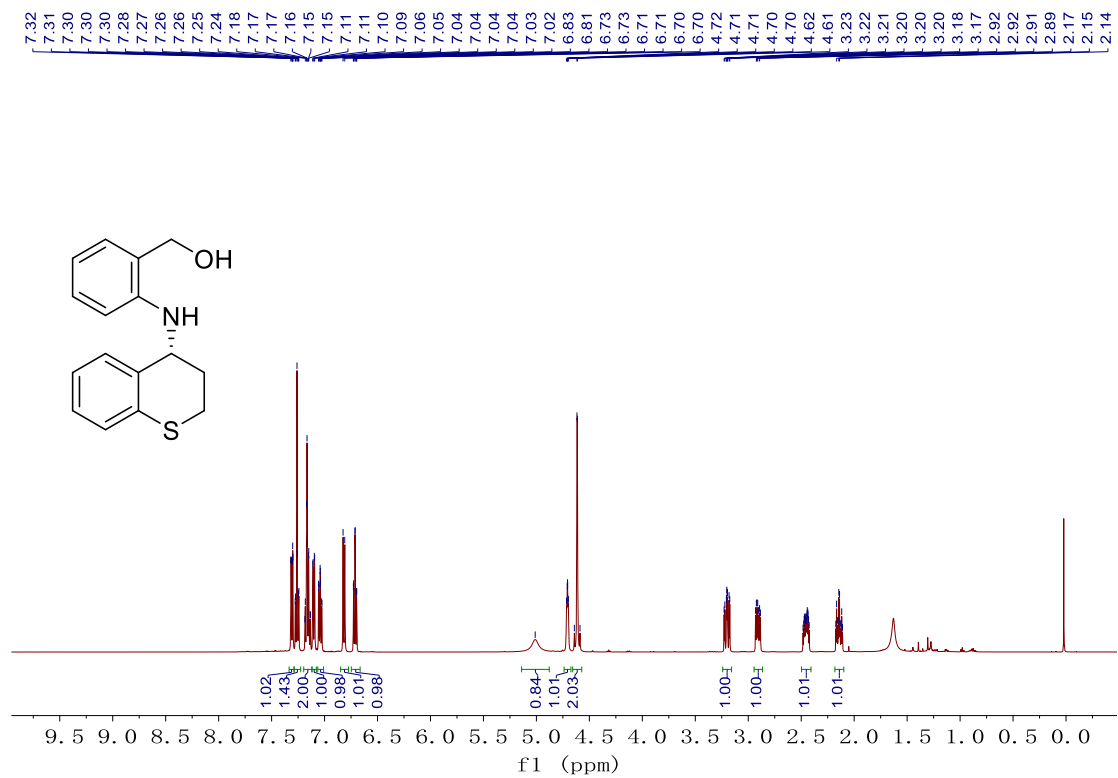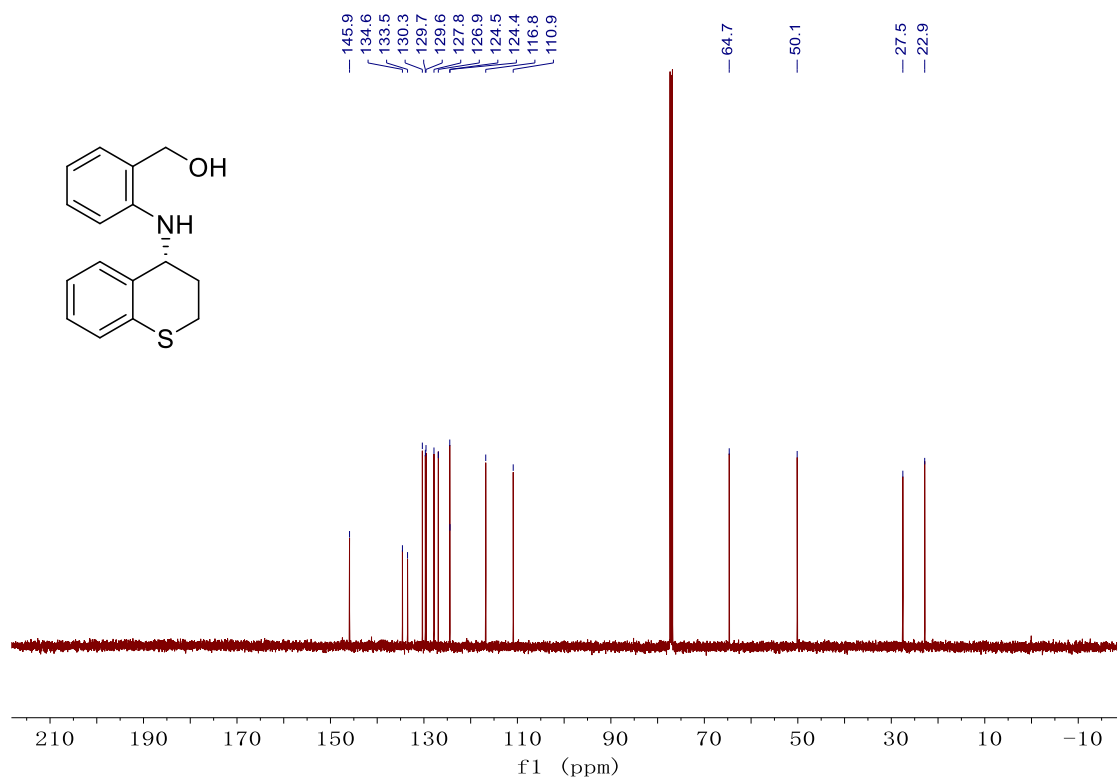

**(R)-(4-fluoro-2-(thiochroman-4-ylamino)phenyl)methanol (3ng)**

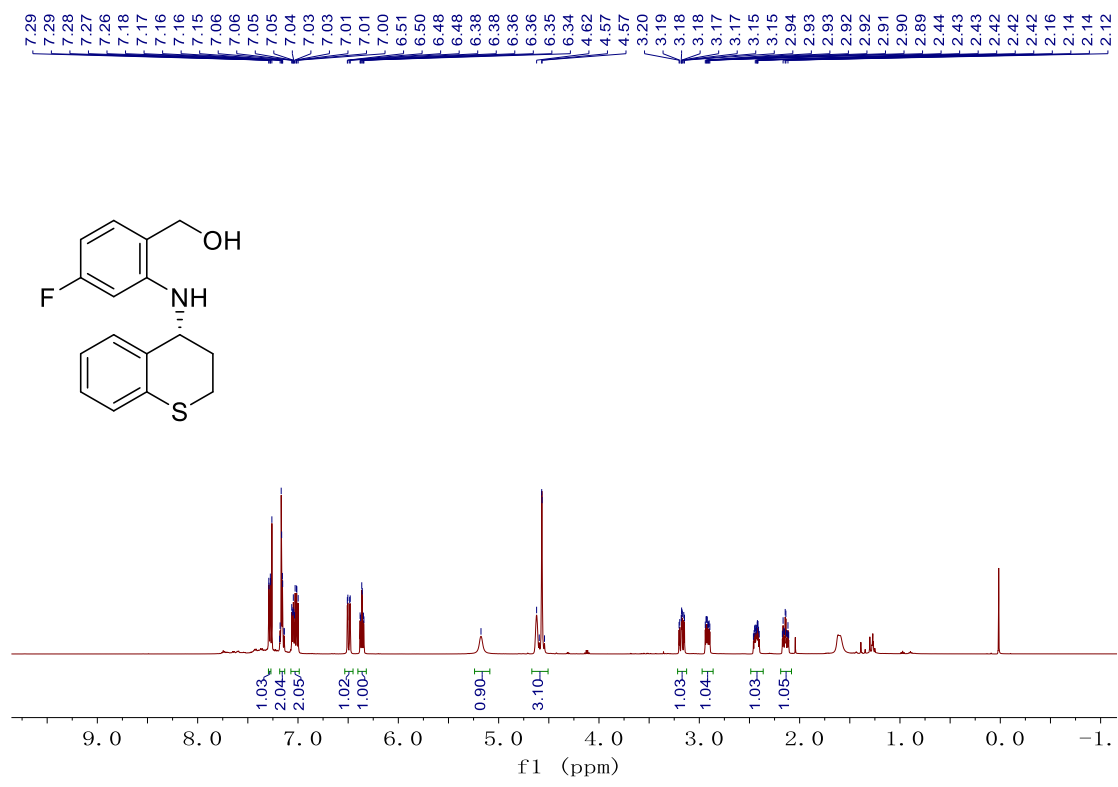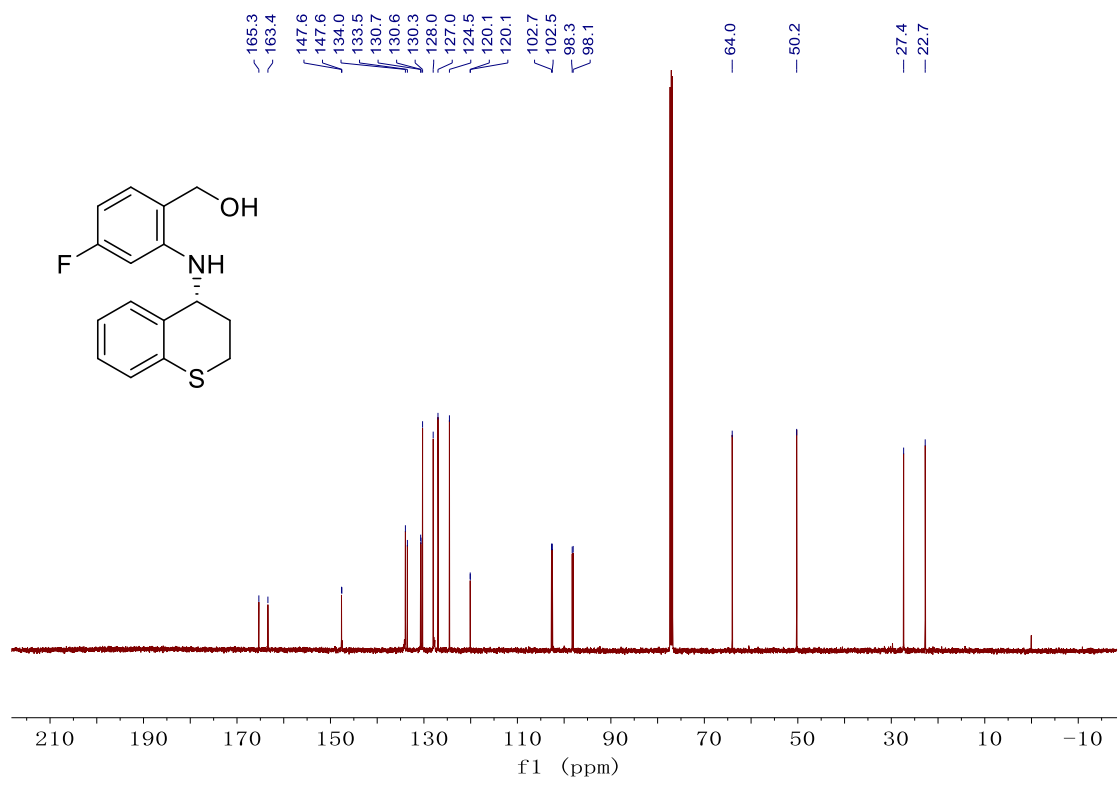

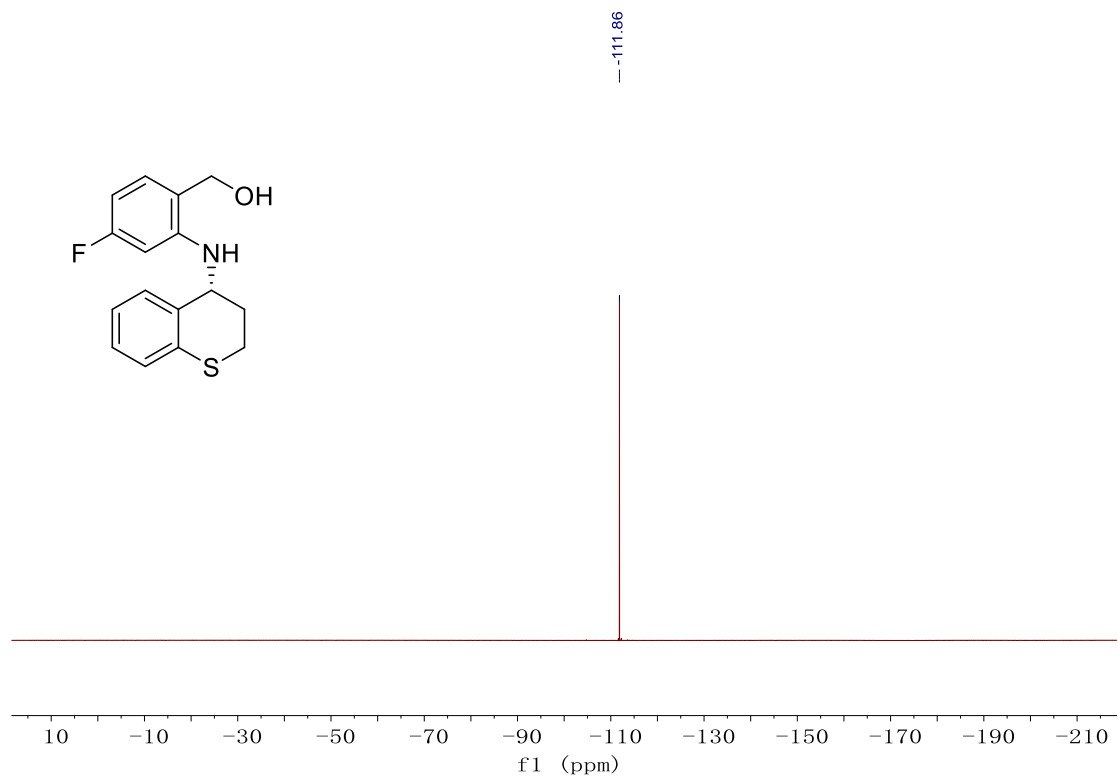

**(R)-4-chloro-2-(thiochroman-4-ylamino)phenylmethanol (3nh)**

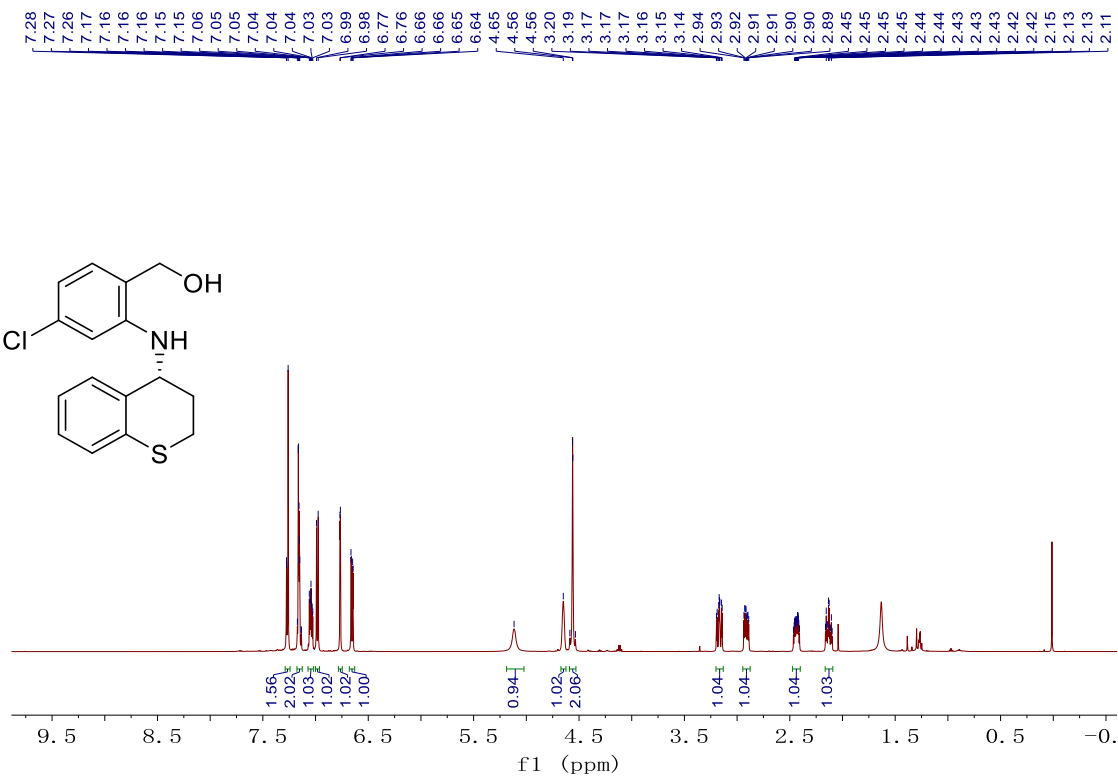



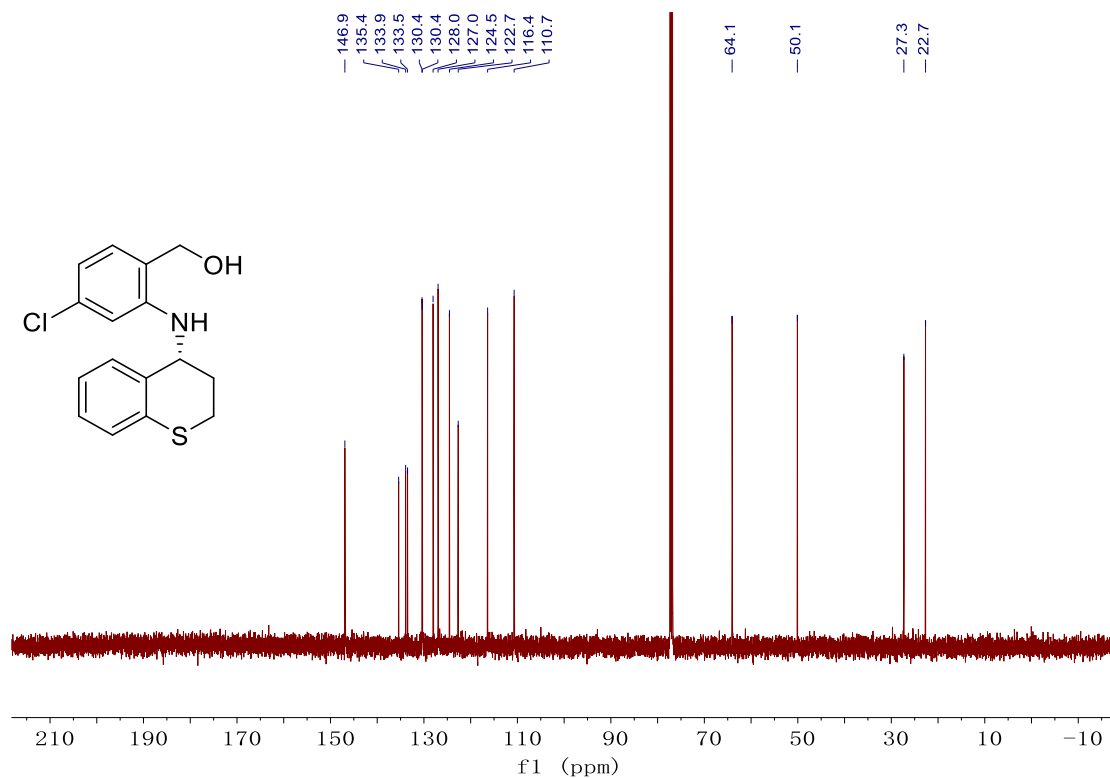

**(R)-5-(5-bromo-2-(thiochroman-4-ylamino)phenyl)methanol (3nf)**

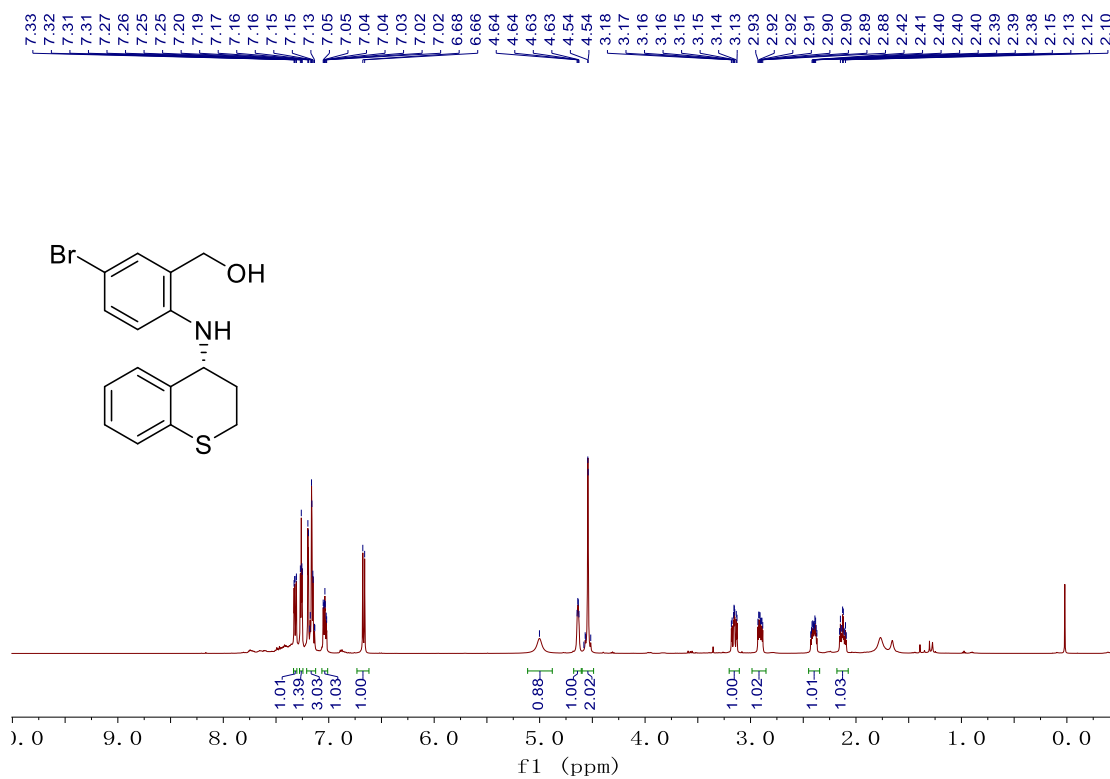

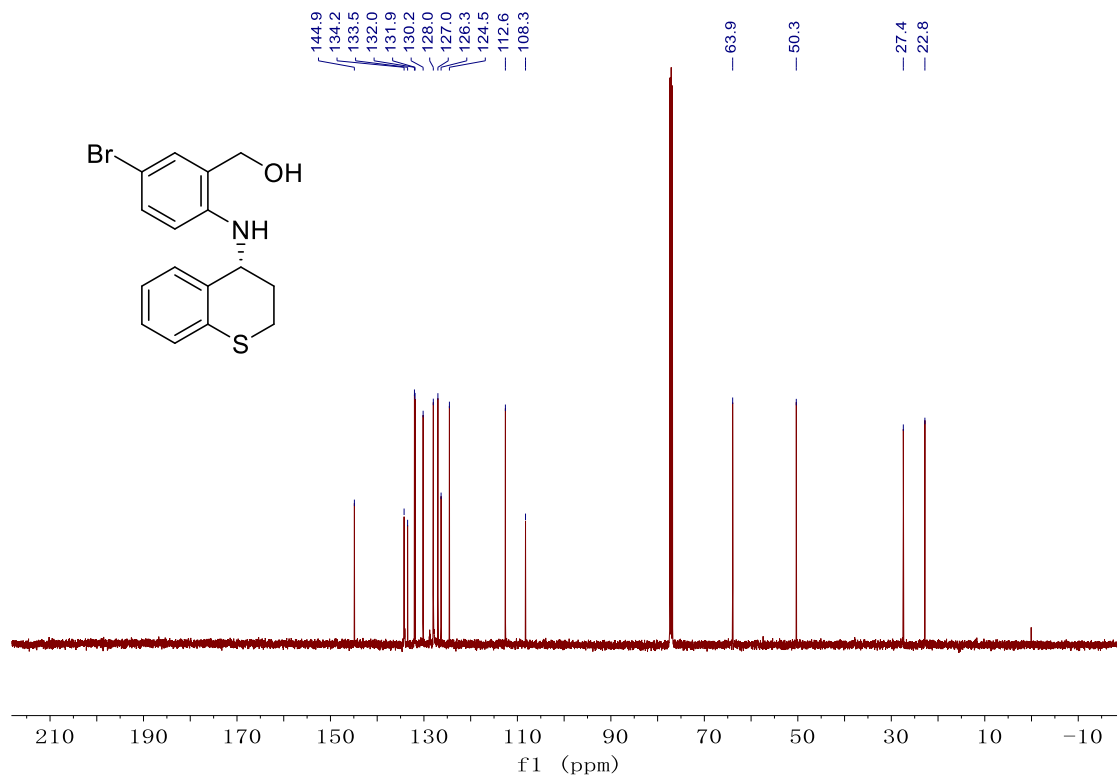

**(R)-2-bromo-6-(thiochroman-4-ylamino)phenylmethanol (3nj)**

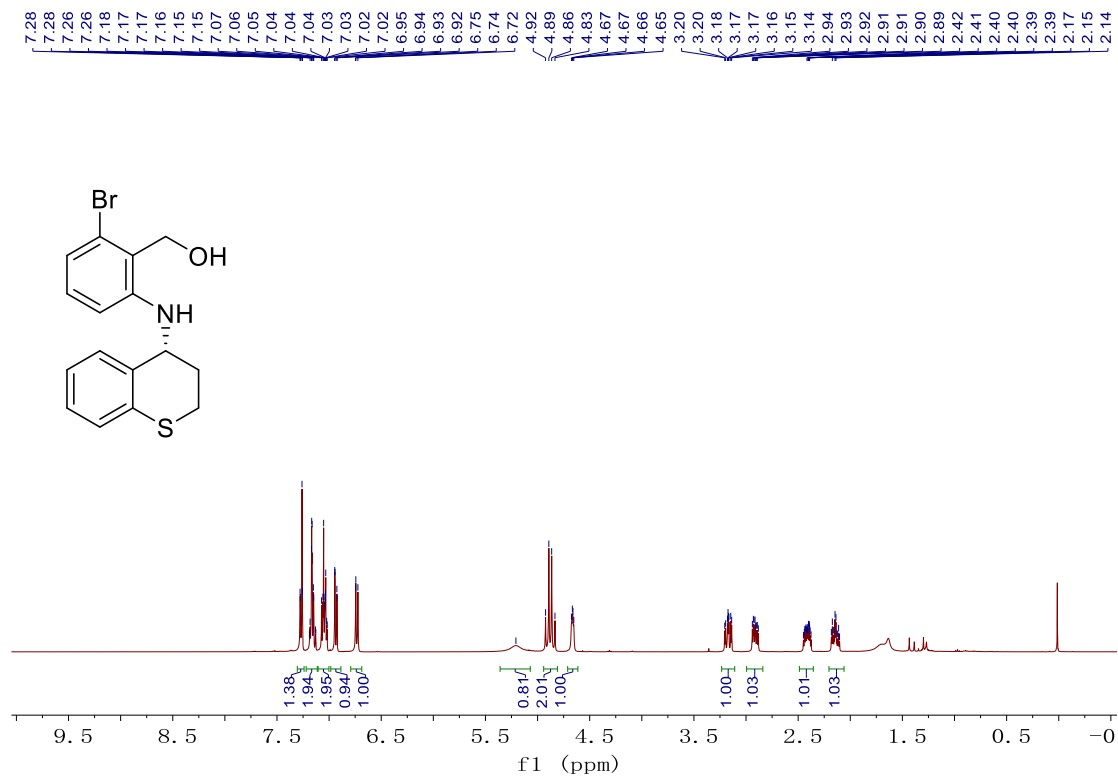

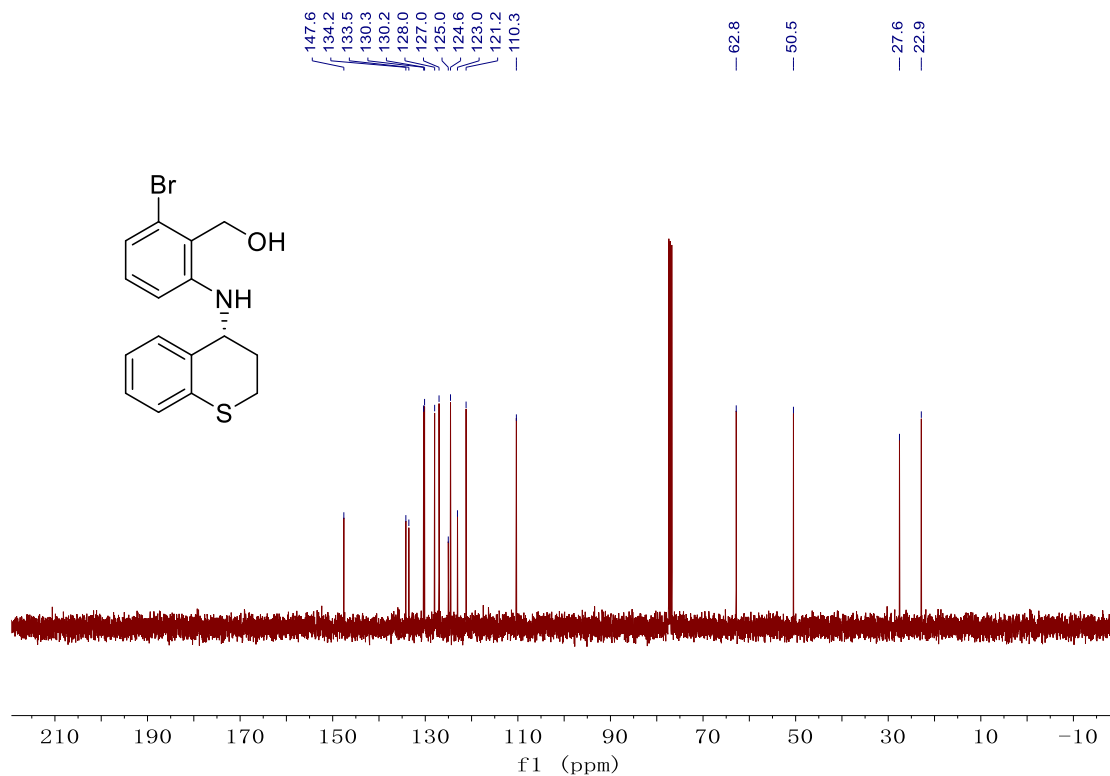

**(4-chloro-2-(((R)-thiochroman-4-yl)amino)phenyl)(phenyl)methanol (3nm)**

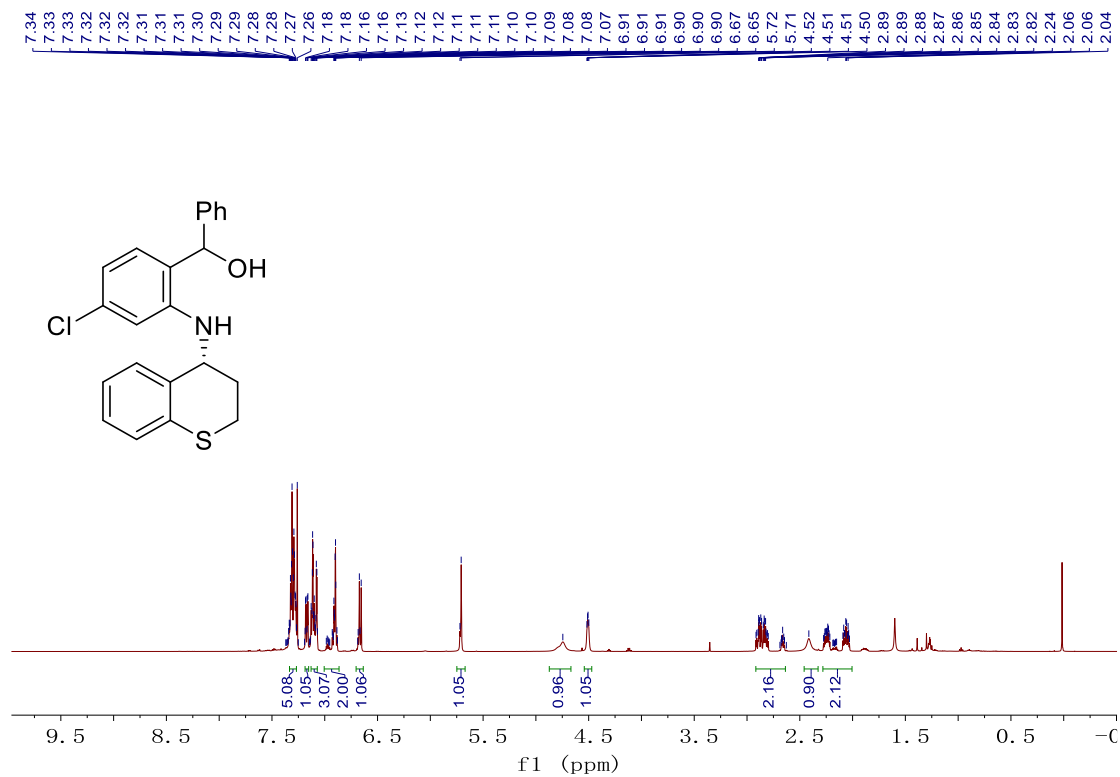

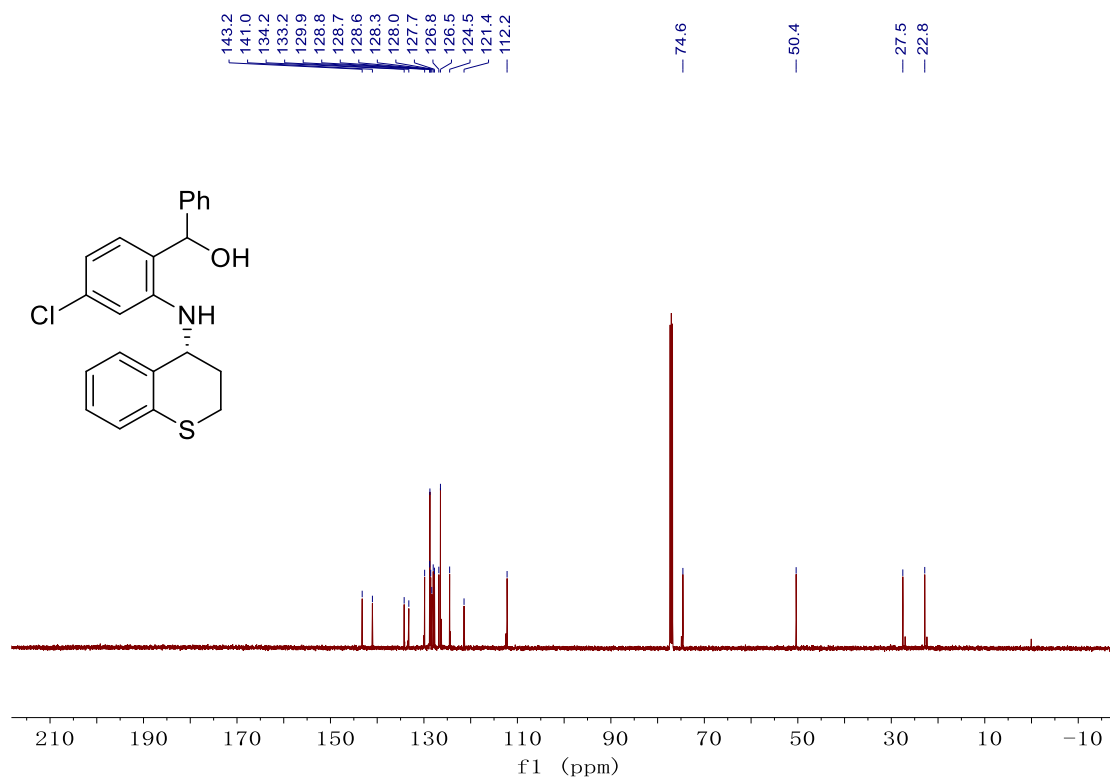

**(R)-4-chloro-2-(thiochroman-4-ylamino)phenyl(phenyl)methanone (3nm')**

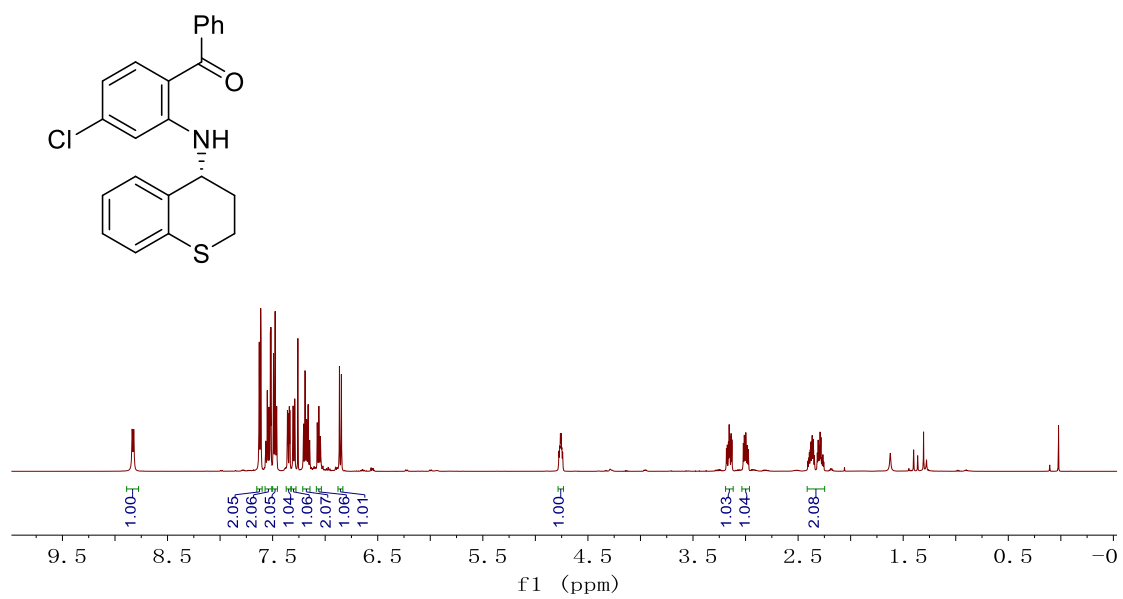

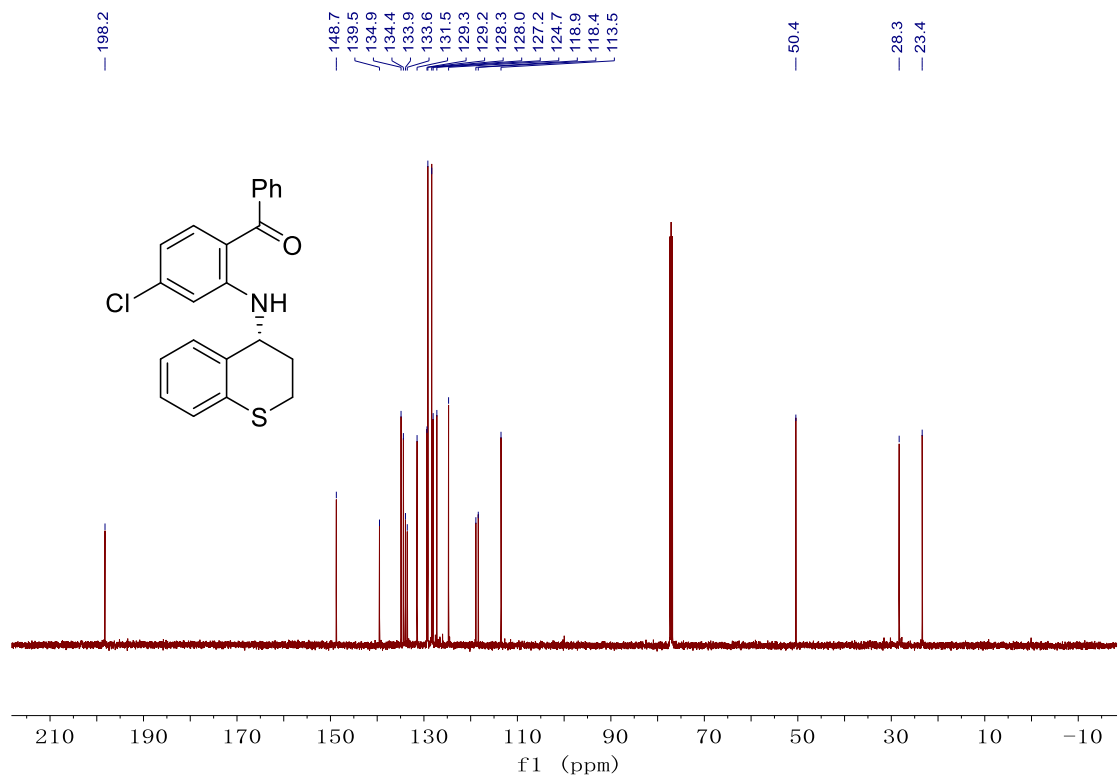

**1-(2-(((R)-thiochroman-4-yl)amino)phenyl)ethan-1-ol (3nl)**

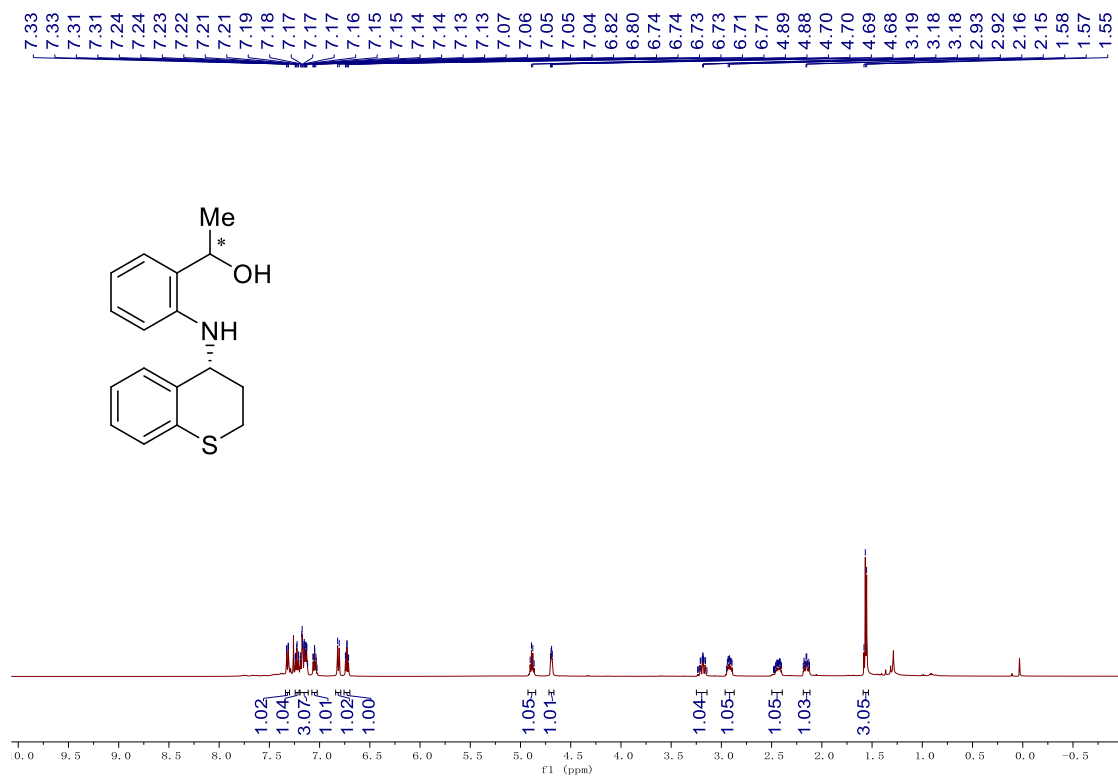

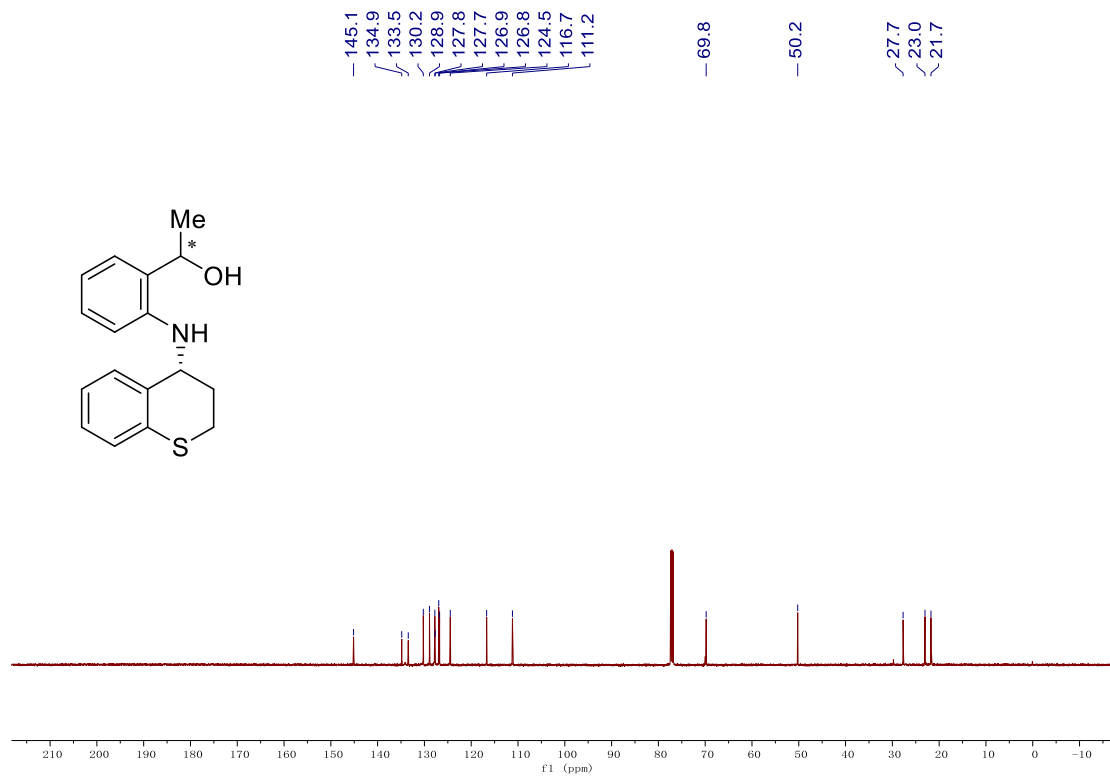

**(R)-1-(2-(thiochroman-4-ylamino)phenyl)ethan-1-one (3nl')**

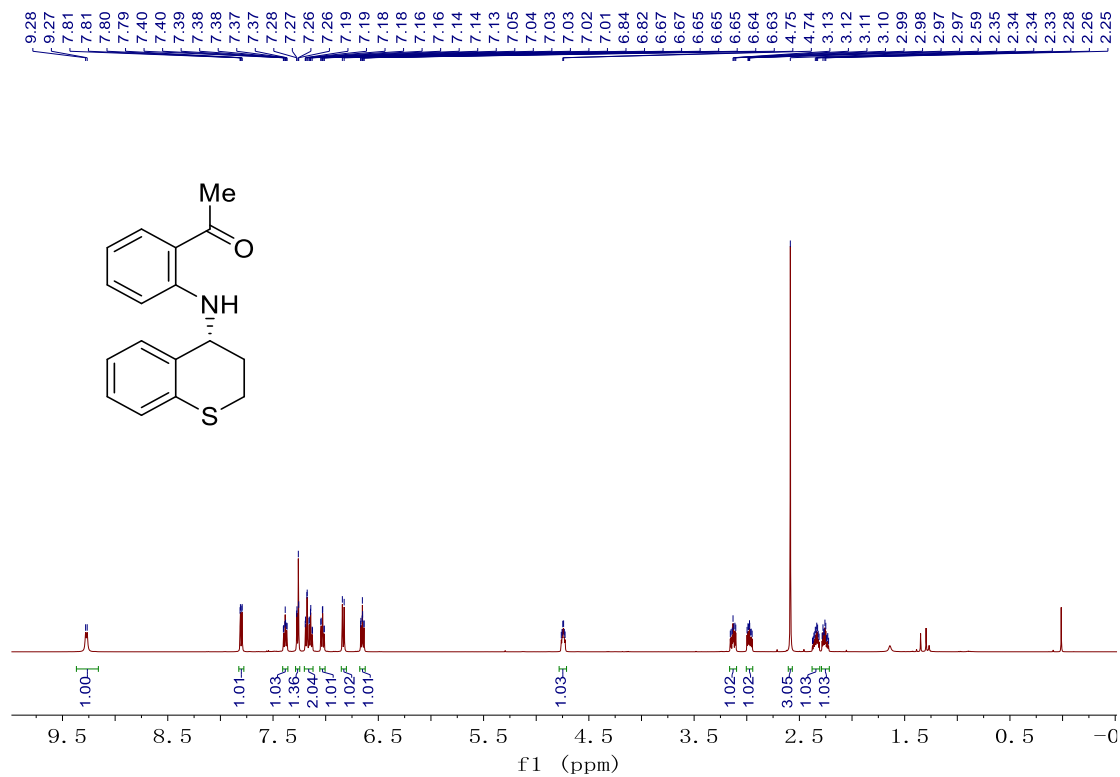

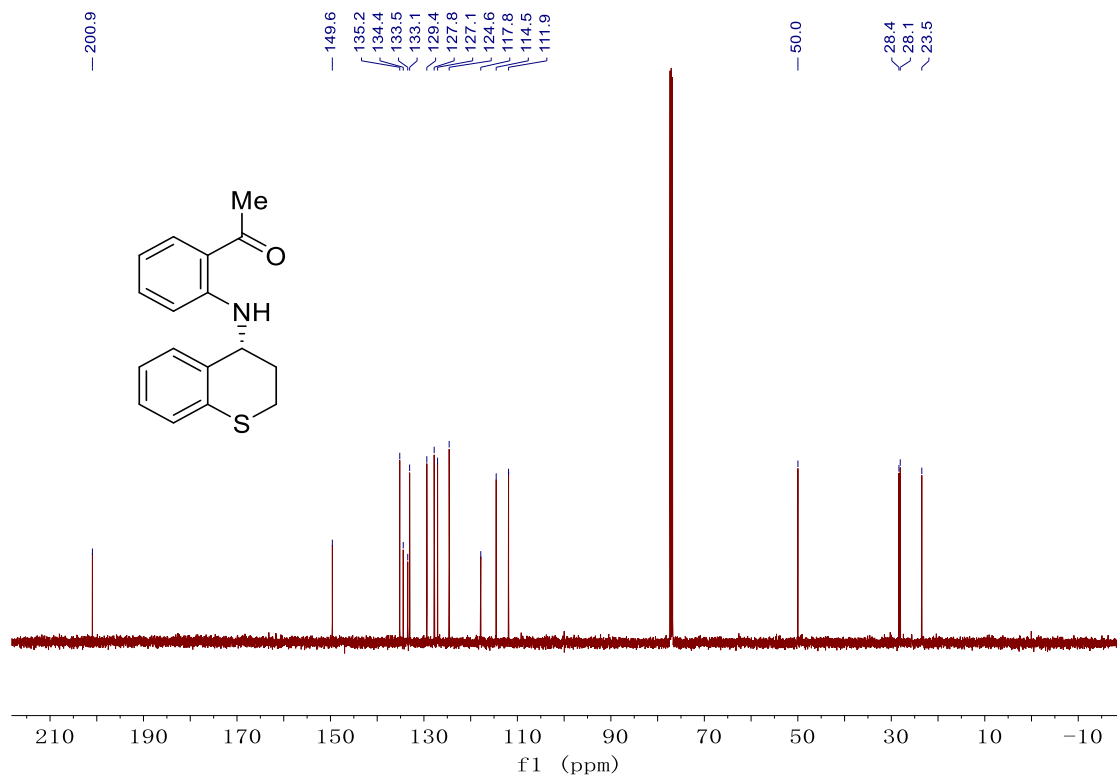

ethyl 2-(1-((*R*)-chroman-4-yl)-2-oxo-1,2,3,5-tetrahydrobenzo[*e*][1,4]oxazepin-3-yl)acetate (4)

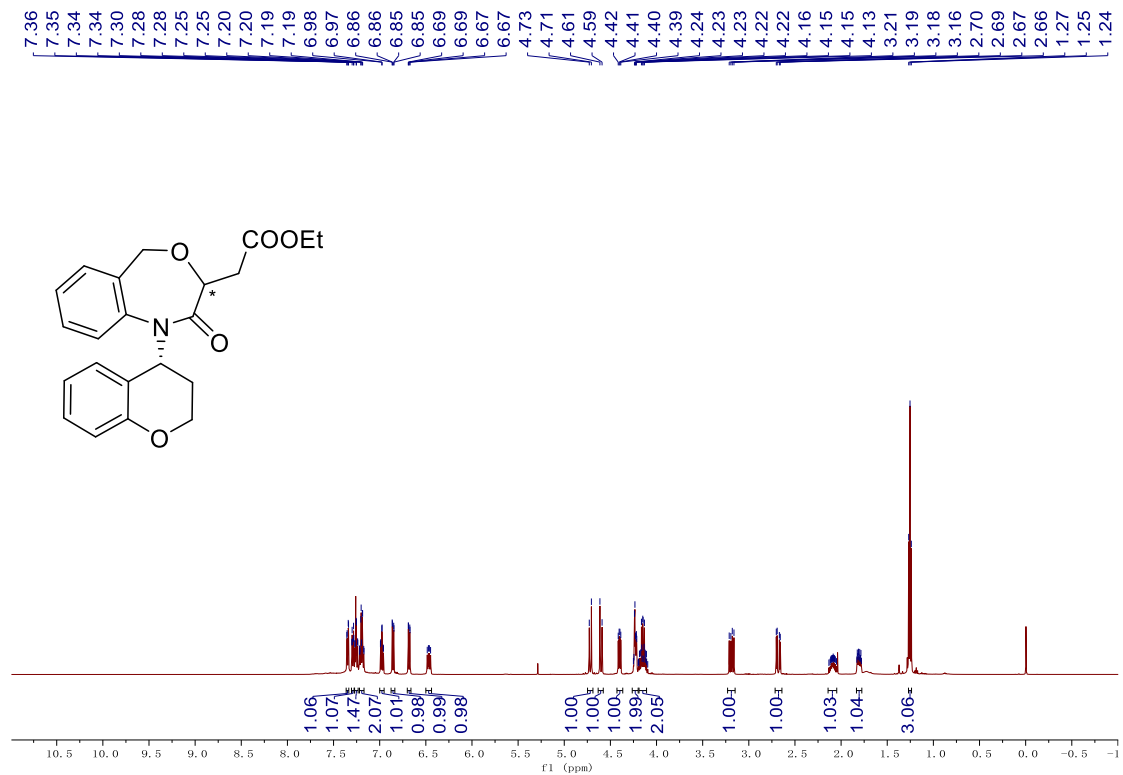

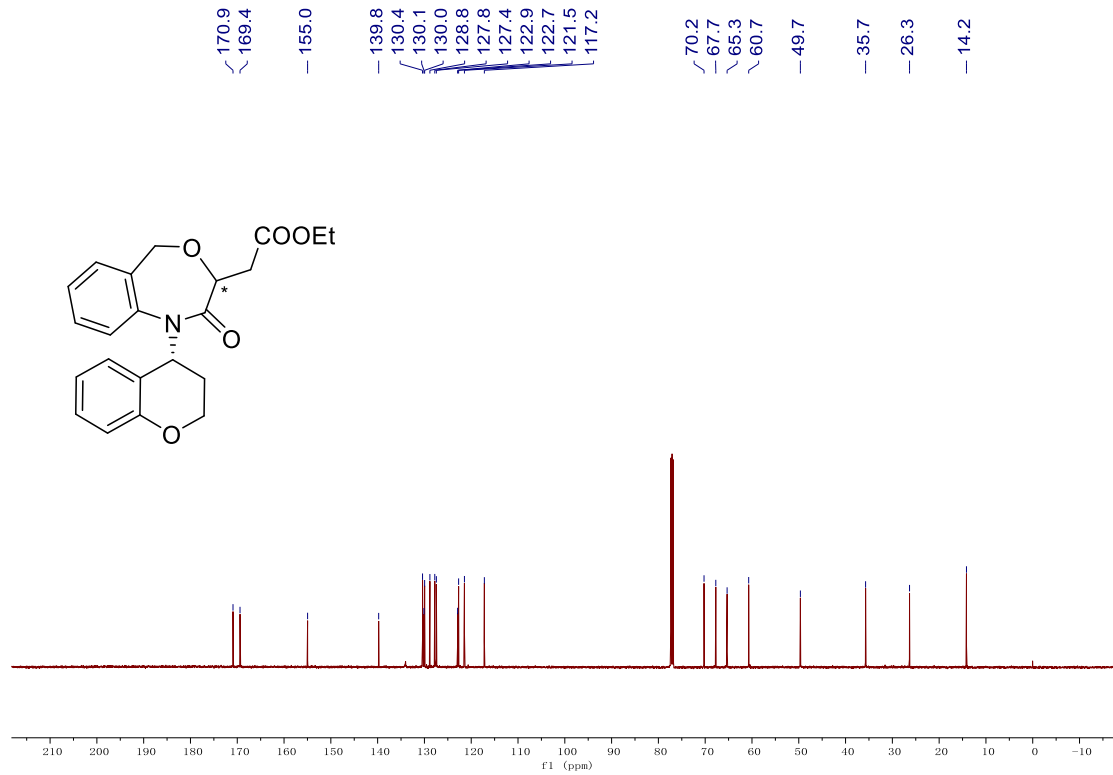

**(R)-1-(chroman-4-yl)-1,4-dihydro-2H-benzo[d][1,3]oxazine (5)**

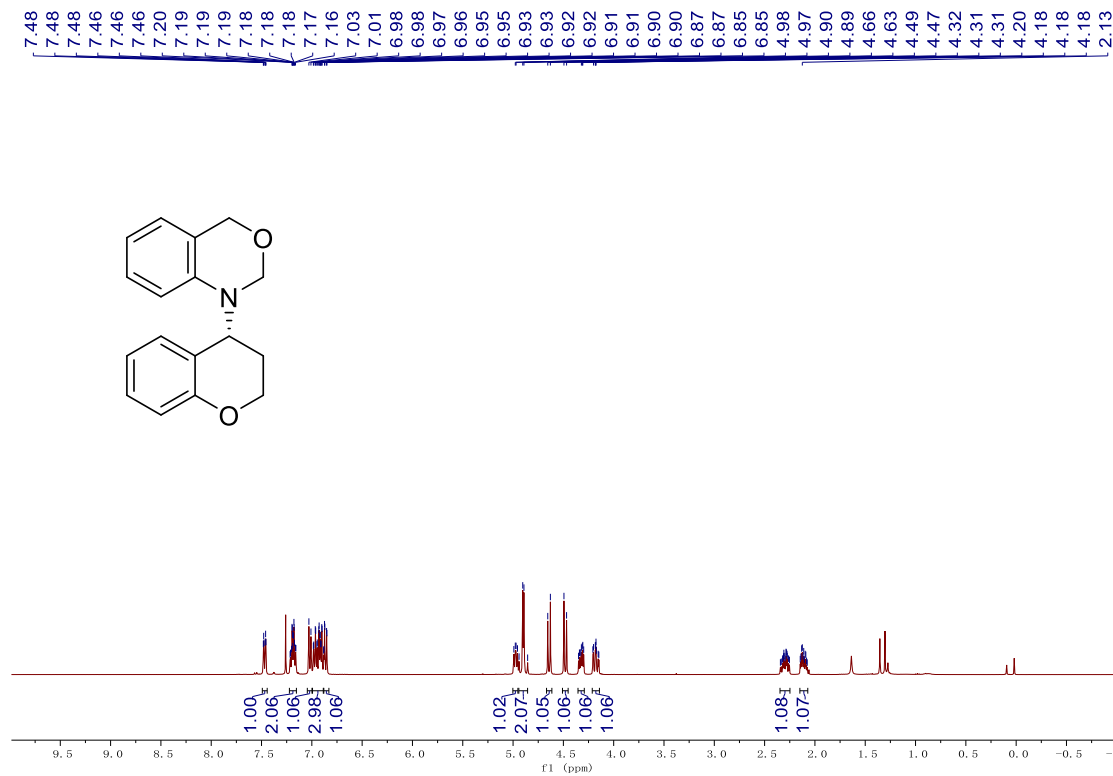



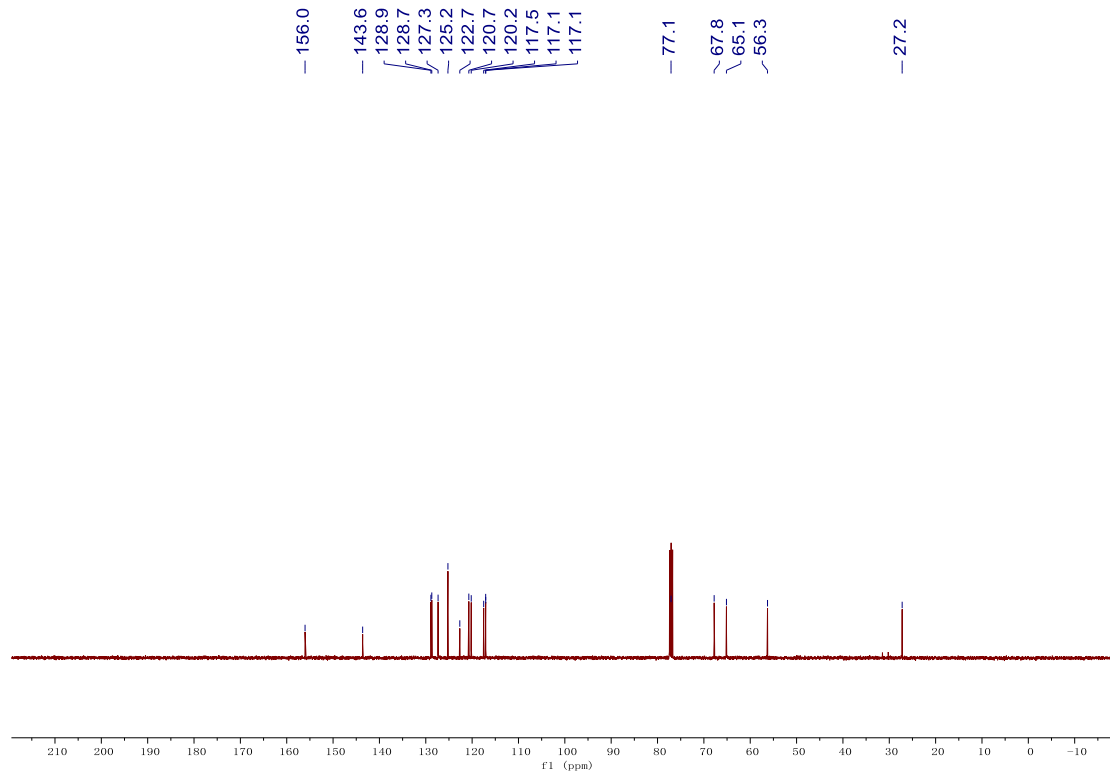

## 7. HPLC Spectrum

### (R)-(2-(chroman-4-ylamino)phenyl)methanol (3aa)

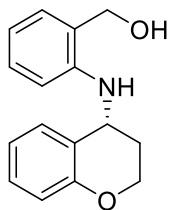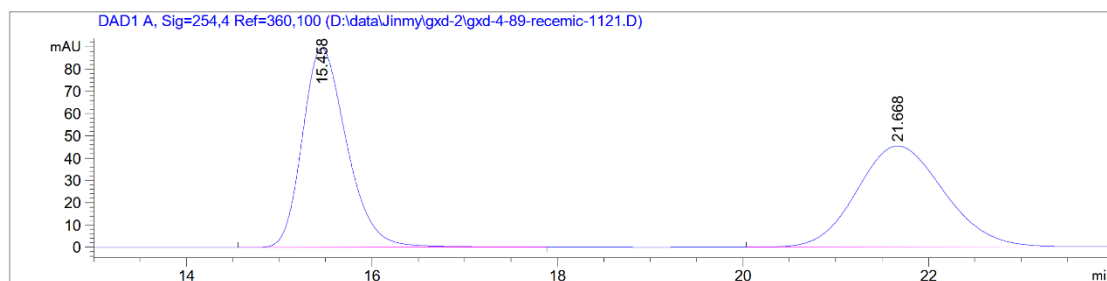

Signal 1: DAD1 A, Sig=254,4 Ref=360,100

| Peak # | RetTime [min] | Type | Width [min] | Area [mAU*s] | Height [mAU] | Area %  |
|--------|---------------|------|-------------|--------------|--------------|---------|
| 1      | 15.458        | BB   | 0.5120      | 2976.71094   | 89.50433     | 50.0890 |
| 2      | 21.668        | BBA  | 1.0166      | 2966.12695   | 45.37621     | 49.9110 |

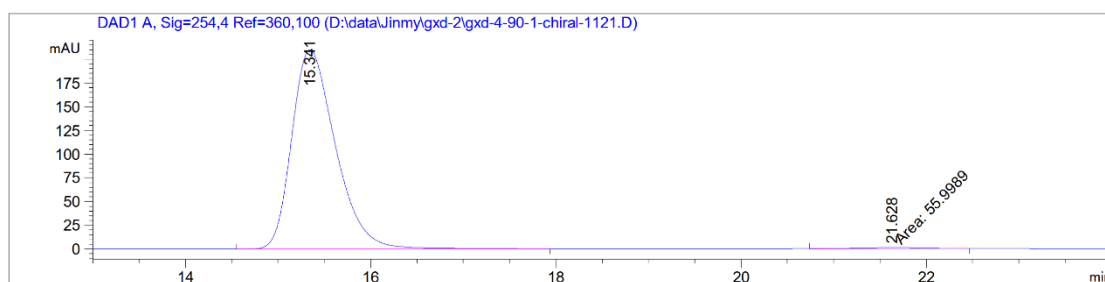

Signal 1: DAD1 A, Sig=254,4 Ref=360,100

| Peak # | RetTime [min] | Type | Width [min] | Area [mAU*s] | Height [mAU] | Area %  |
|--------|---------------|------|-------------|--------------|--------------|---------|
| 1      | 15.341        | BB   | 0.5039      | 6867.77393   | 209.77849    | 99.1912 |
| 2      | 21.628        | MM   | 0.8806      | 55.99893     | 1.05987      | 0.8088  |

Totals : 6923.77285 210.83836

### (R)-2-((6-methoxychroman-4-yl)amino)phenylmethanol (3ba)

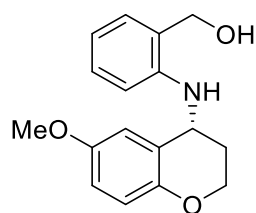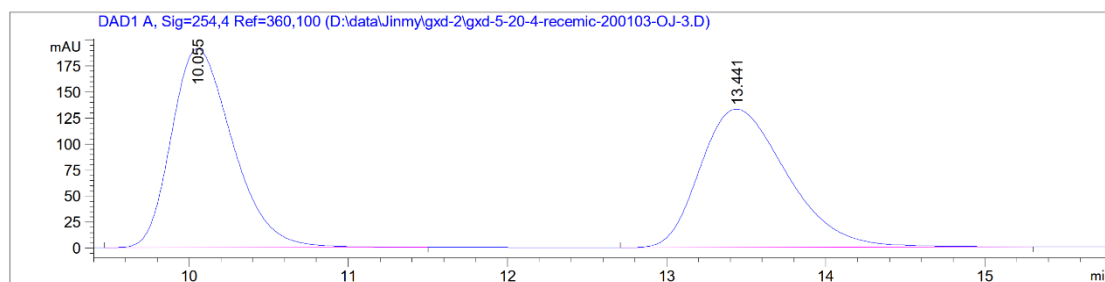

Signal 1: DAD1 A, Sig=254,4 Ref=360,100

| Peak # | RetTime [min] | Type | Width [min] | Area [mAU*s] | Height [mAU] | Area %  |
|--------|---------------|------|-------------|--------------|--------------|---------|
| 1      | 10.055        | BB   | 0.4153      | 5102.24561   | 191.20593    | 50.3364 |
| 2      | 13.441        | BB   | 0.5918      | 5034.04297   | 132.93022    | 49.6636 |

Totals : 1.01363e4 324.13615

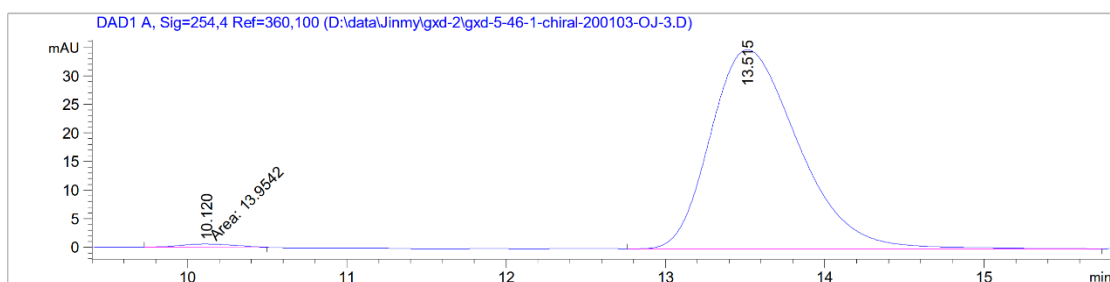

Signal 1: DAD1 A, Sig=254,4 Ref=360,100

| Peak # | RetTime [min] | Type | Width [min] | Area [mAU*s] | Height [mAU] | Area %  |
|--------|---------------|------|-------------|--------------|--------------|---------|
| 1      | 10.120        | MM   | 0.4070      | 13.95423     | 5.71487e-1   | 1.0345  |
| 2      | 13.515        | BB   | 0.5955      | 1334.96936   | 34.80577     | 98.9655 |

Totals : 1348.92359 35.37726

### (R)-2-(((6-methylchroman-4-yl)amino)phenyl)methanol (3ca)

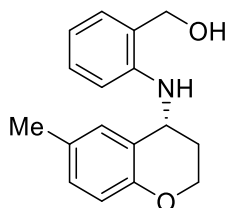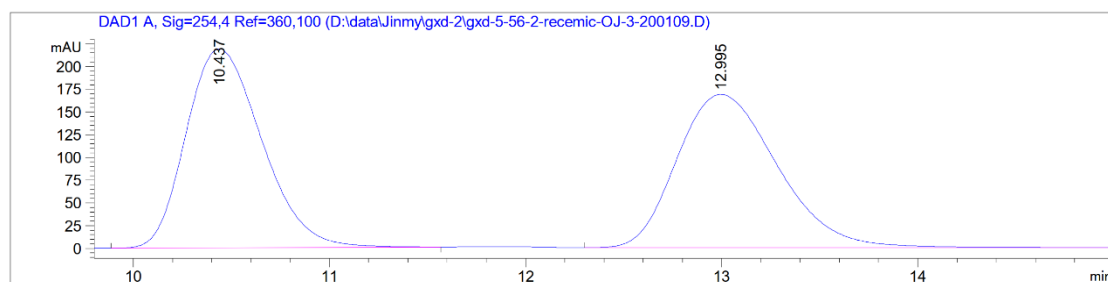

Signal 1: DAD1 A, Sig=254,4 Ref=360,100

| Peak # | RetTime [min] | Type | Width [min] | Area [mAU*s] | Height [mAU] | Area %  |
|--------|---------------|------|-------------|--------------|--------------|---------|
| 1      | 10.437        | BB   | 0.4205      | 5859.16064   | 218.71104    | 49.4025 |
| 2      | 12.995        | BBA  | 0.5595      | 6000.89697   | 168.51047    | 50.5975 |

Totals : 1.18601e4 387.22151

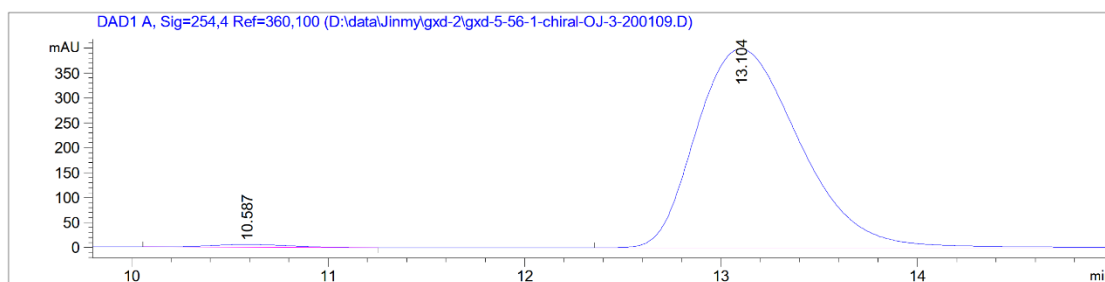

Signal 1: DAD1 A, Sig=254,4 Ref=360,100

| Peak # | RetTime [min] | Type | Width [min] | Area [mAU*s] | Height [mAU] | Area %  |
|--------|---------------|------|-------------|--------------|--------------|---------|
| 1      | 10.587        | BB   | 0.3944      | 148.62700    | 5.41217      | 1.0118  |
| 2      | 13.104        | BB   | 0.5774      | 1.45412e4    | 398.82242    | 98.9882 |

Totals : 1.46898e4 404.23459

### (R)-2-(((6-bromochroman-4-yl)amino)phenyl)methanol (3da)

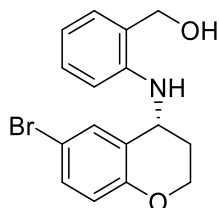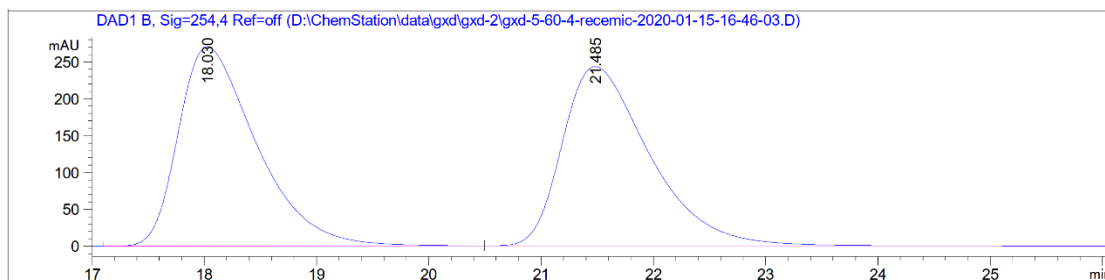

Signal 2: DAD1 B, Sig=254,4 Ref=off

| Peak # | RetTime [min] | Type | Width [min] | Area [mAU*s] | Height [mAU] | Area %  |
|--------|---------------|------|-------------|--------------|--------------|---------|
| 1      | 18.030        | BB   | 0.7376      | 1.30836e4    | 269.87268    | 49.8064 |
| 2      | 21.485        | BB   | 0.8267      | 1.31854e4    | 243.11670    | 50.1936 |

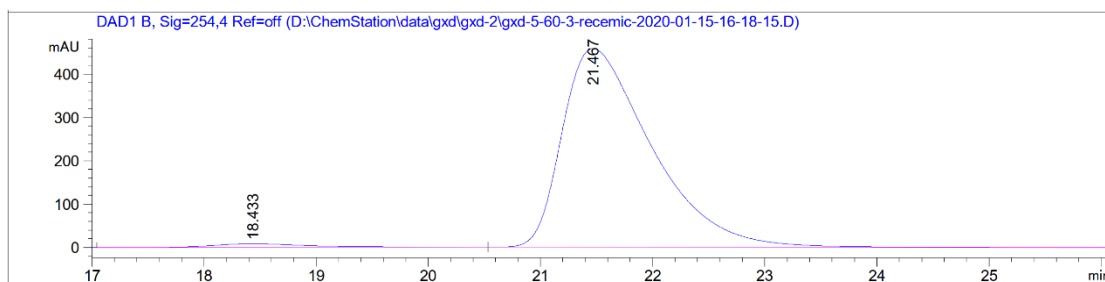

Signal 2: DAD1 B, Sig=254,4 Ref=off

| Peak # | RetTime [min] | Type | Width [min] | Area [mAU*s] | Height [mAU] | Area %  |
|--------|---------------|------|-------------|--------------|--------------|---------|
| 1      | 18.433        | BB   | 0.8715      | 519.79315    | 8.45166      | 2.0099  |
| 2      | 21.467        | BBA  | 0.8370      | 2.53421e4    | 458.40262    | 97.9901 |

Totals : 2.58619e4 466.85428

### (R)-(2-((6-chlorochroman-4-yl)amino)phenyl)methanol (3ea)

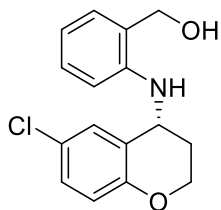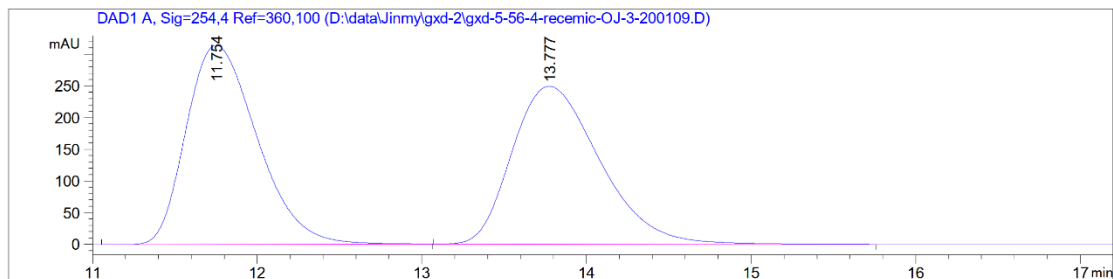

Signal 1: DAD1 A, Sig=254,4 Ref=360,100

| Peak # | RetTime [min] | Type | Width [min] | Area [mAU*s] | Height [mAU] | Area %  |
|--------|---------------|------|-------------|--------------|--------------|---------|
| 1      | 11.754        | BB   | 0.4691      | 9404.85156   | 314.29456    | 50.4391 |
| 2      | 13.777        | BB   | 0.5825      | 9241.09180   | 249.26575    | 49.5609 |

Totals : 1.86459e4 563.56030

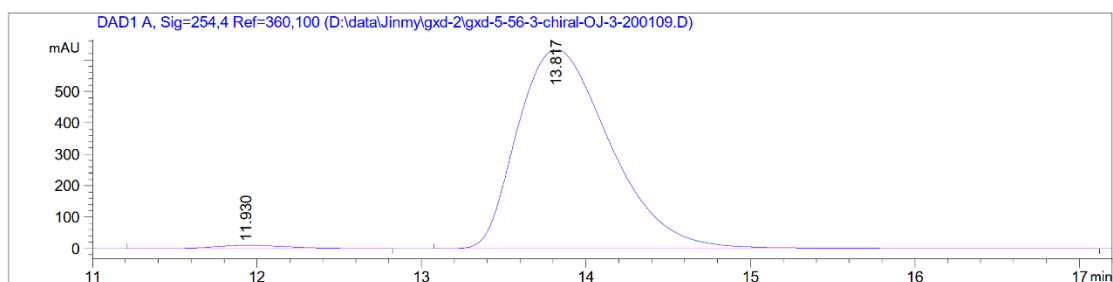

Signal 1: DAD1 A, Sig=254,4 Ref=360,100

| Peak # | RetTime [min] | Type | Width [min] | Area [mAU*s] | Height [mAU] | Area %  |
|--------|---------------|------|-------------|--------------|--------------|---------|
| 1      | 11.930        | BB   | 0.5060      | 337.40213    | 10.46941     | 1.3427  |
| 2      | 13.817        | BB   | 0.6179      | 2.47919e4    | 634.39648    | 98.6573 |

Totals : 2.51293e4 644.86590

### (R)-(2-((6-fluorochroman-4-yl)amino)phenyl)methanol (3fa)

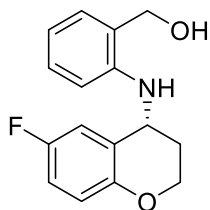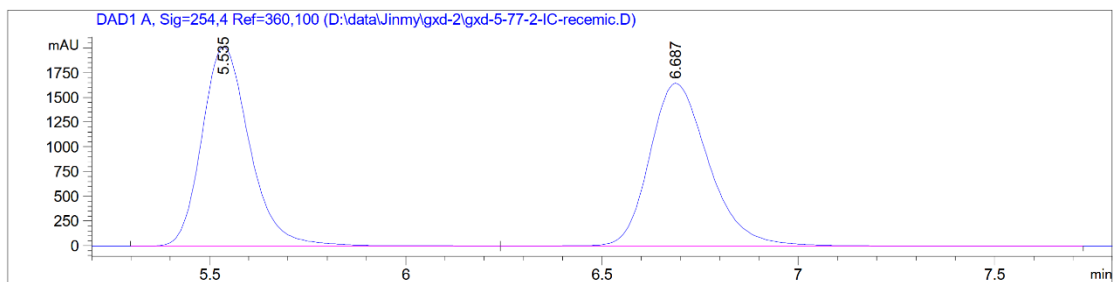

Signal 1: DAD1 A, Sig=254,4 Ref=360,100

| Peak # | RetTime [min] | Type | Width [min] | Area [mAU*s] | Height [mAU] | Area %  |
|--------|---------------|------|-------------|--------------|--------------|---------|
| 1      | 5.535         | BV R | 0.1302      | 1.70161e4    | 2018.80334   | 49.6591 |
| 2      | 6.687         | VB   | 0.1623      | 1.72497e4    | 1645.98511   | 50.3409 |

Totals : 3.42658e4 3664.78845

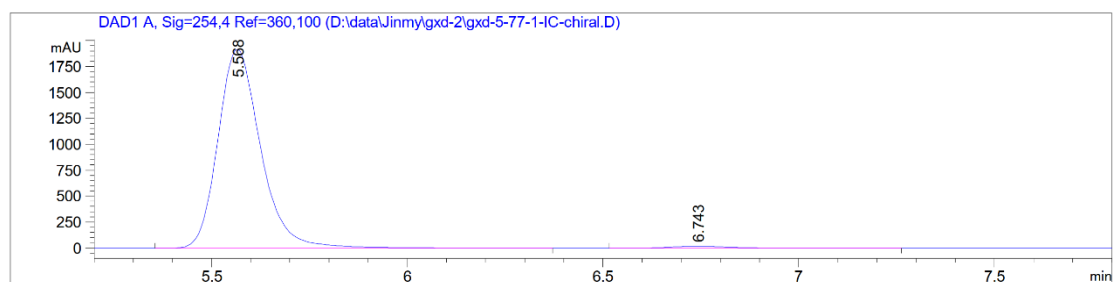

Signal 1: DAD1 A, Sig=254,4 Ref=360,100

| Peak # | RetTime [min] | Type | Width [min] | Area [mAU*s] | Height [mAU] | Area %  |
|--------|---------------|------|-------------|--------------|--------------|---------|
| 1      | 5.568         | BB   | 0.1164      | 1.45478e4    | 1919.49829   | 98.6866 |
| 2      | 6.743         | BB   | 0.1488      | 193.60770    | 19.68316     | 1.3134  |

Totals : 1.47414e4 1939.18145

### (R)-(2-((6-phenylchroman-4-yl)amino)phenyl)methanol (3ga)

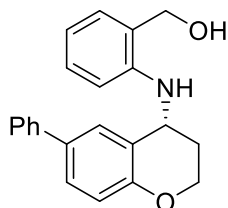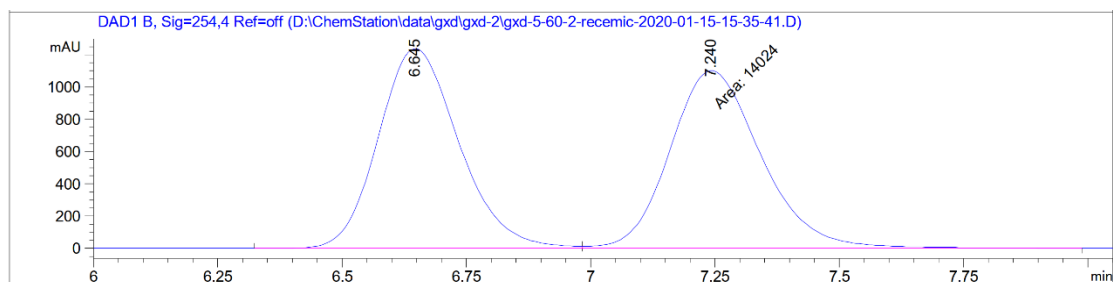

Signal 2: DAD1 B, Sig=254,4 Ref=off

| Peak # | RetTime [min] | Type | Width [min] | Area [mAU*s] | Height [mAU] | Area %  |
|--------|---------------|------|-------------|--------------|--------------|---------|
| 1      | 6.645         | BV   | 0.1734      | 1.39226e4    | 1236.04980   | 49.8186 |
| 2      | 7.240         | MF   | 0.2124      | 1.40240e4    | 1100.20471   | 50.1814 |

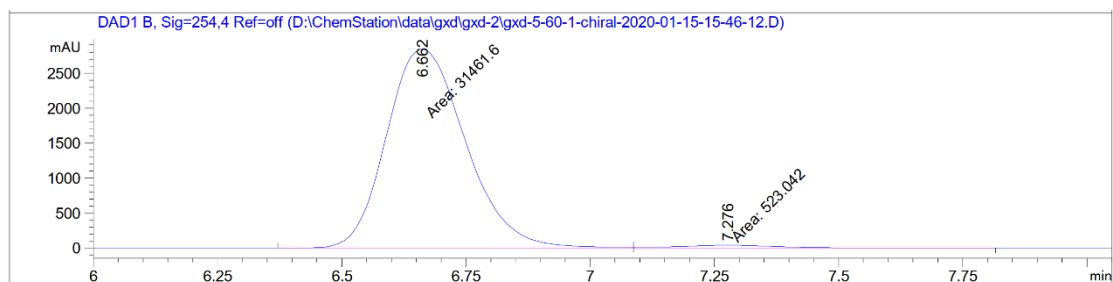

Signal 2: DAD1 B, Sig=254,4 Ref=off

| Peak # | RetTime [min] | Type | Width [min] | Area [mAU*s] | Height [mAU] | Area %  |
|--------|---------------|------|-------------|--------------|--------------|---------|
| 1      | 6.662         | MF   | 0.1843      | 3.14616e4    | 2844.64404   | 98.3647 |
| 2      | 7.276         | FM   | 0.2224      | 523.04156    | 39.20096     | 1.6353  |

Totals : 3.19847e4 2883.84501

### (R)-2-(((6,8-dimethylchroman-4-yl)amino)phenyl)methanol (3ha)

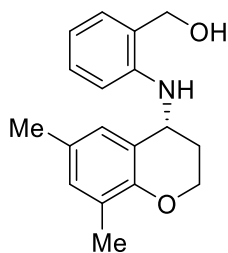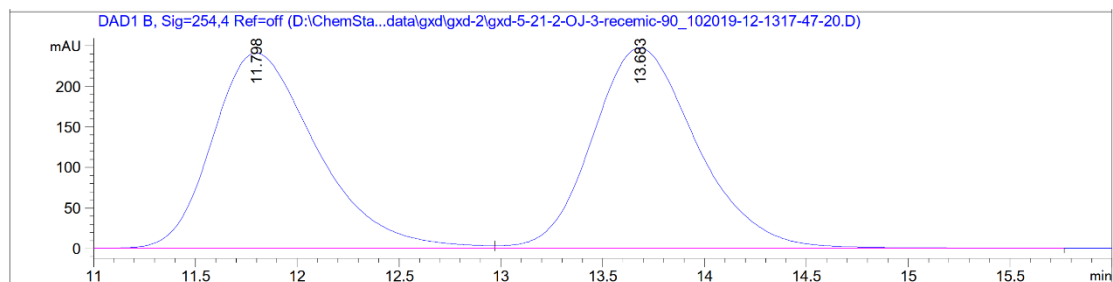



Signal 2: DAD1 B, Sig=254,4 Ref=off

| Peak # | RetTime [min] | Type | Width [min] | Area [mAU*s] | Height [mAU] | Area %  |
|--------|---------------|------|-------------|--------------|--------------|---------|
| 1      | 11.798        | BV   | 0.5443      | 8537.05273   | 240.38194    | 49.3159 |
| 2      | 13.683        | VB   | 0.5491      | 8773.88672   | 246.61345    | 50.6841 |

Totals : 1.73109e4 486.99539

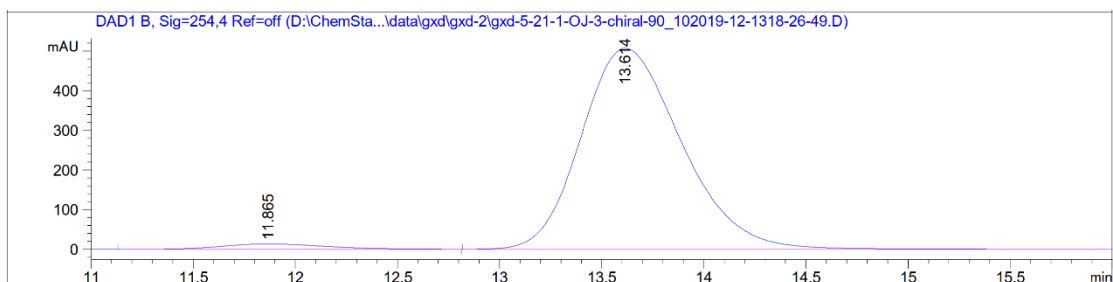

Signal 2: DAD1 B, Sig=254,4 Ref=off

| Peak # | RetTime [min] | Type | Width [min] | Area [mAU*s] | Height [mAU] | Area %  |
|--------|---------------|------|-------------|--------------|--------------|---------|
| 1      | 11.865        | BB   | 0.5310      | 463.17526    | 13.21232     | 2.6045  |
| 2      | 13.614        | BB   | 0.5285      | 1.73206e4    | 507.05347    | 97.3955 |

Totals : 1.77838e4 520.26579

**(R)-2-((3,4-dihydro-2H-benzo[h]chromen-4-yl)amino)phenyl)methanol (3ia)**

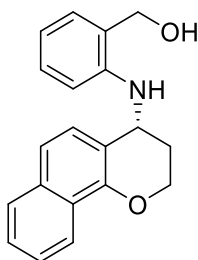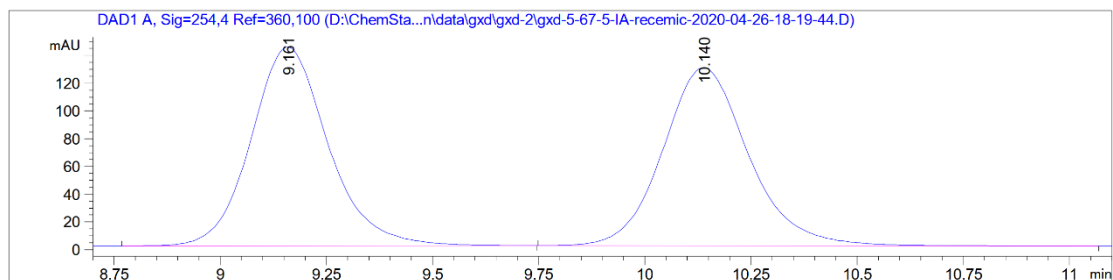

Signal 1: DAD1 A, Sig=254,4 Ref=360,100

| Peak # | RetTime [min] | Type | Width [min] | Area [mAU*s] | Height [mAU] | Area %  |
|--------|---------------|------|-------------|--------------|--------------|---------|
| 1      | 9.161         | BB   | 0.1914      | 1811.32349   | 143.40982    | 50.0904 |
| 2      | 10.140        | BB   | 0.2138      | 1804.78467   | 128.52042    | 49.9096 |

Totals : 3616.10815 271.93024

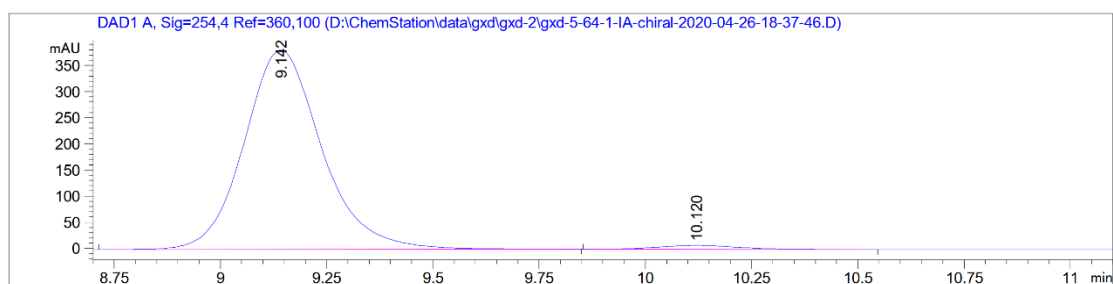

Signal 1: DAD1 A, Sig=254,4 Ref=360,100

| Peak # | RetTime [min] | Type | Width [min] | Area [mAU*s] | Height [mAU] | Area %  |
|--------|---------------|------|-------------|--------------|--------------|---------|
| 1      | 9.142         | BB   | 0.1942      | 4851.01465   | 381.84607    | 98.0100 |
| 2      | 10.120        | BB   | 0.2073      | 98.49758     | 7.30544      | 1.9900  |

Totals : 4949.51223 389.15151

**(R)-(2-((6,6-dimethyl-7,8-dihydro-6H-[1,3]dioxolo[4,5-g]chromen-8-yl)amino)phenyl)methanol (3ja)**

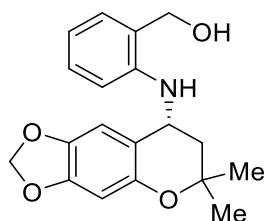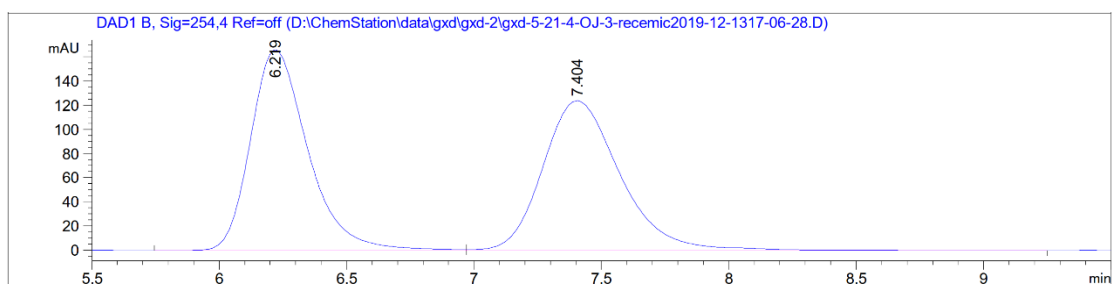

Signal 2: DAD1 B, Sig=254,4 Ref=off

| Peak # | RetTime [min] | Type | Width [min] | Area [mAU*s] | Height [mAU] | Area %  |
|--------|---------------|------|-------------|--------------|--------------|---------|
| 1      | 6.219         | BV   | 0.2406      | 2604.79468   | 166.40924    | 49.7679 |
| 2      | 7.404         | VB   | 0.3230      | 2629.09253   | 124.18684    | 50.2321 |

Totals : 5233.88721 290.59608

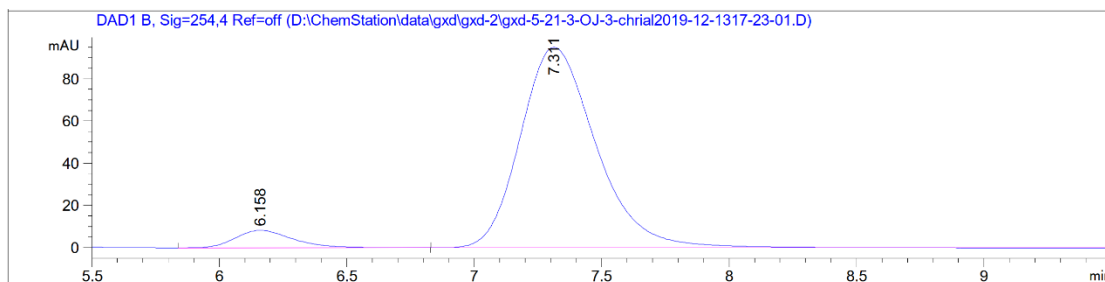

Signal 2: DAD1 B, Sig=254,4 Ref=off

| Peak # | RetTime [min] | Type | Width [min] | Area [mAU*s] | Height [mAU] | Area %  |
|--------|---------------|------|-------------|--------------|--------------|---------|
| 1      | 6.158         | BB   | 0.2365      | 129.38199    | 8.27130      | 6.1634  |
| 2      | 7.311         | BB   | 0.3178      | 1969.82446   | 95.03085     | 93.8366 |

Totals : 2099.20645 103.30215

### (2-(((2S,4R)-2-phenylchroman-4-yl)amino)phenyl)methanol (3ka)

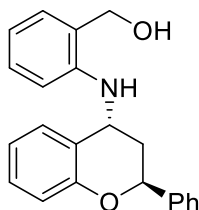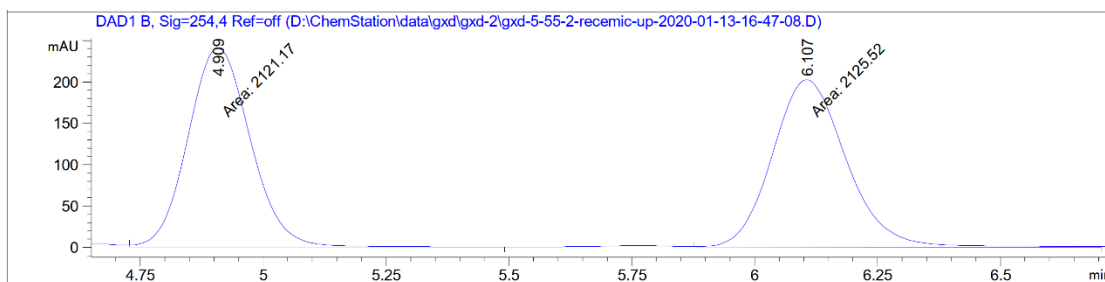

Signal 2: DAD1 B, Sig=254,4 Ref=off

| Peak # | RetTime [min] | Type | Width [min] | Area [mAU*s] | Height [mAU] | Area %  |
|--------|---------------|------|-------------|--------------|--------------|---------|
| 1      | 4.909         | FM   | 0.1468      | 2121.17163   | 240.75459    | 49.9489 |
| 2      | 6.107         | FM   | 0.1750      | 2125.51538   | 202.44238    | 50.0511 |

Totals : 4246.68701 443.19698

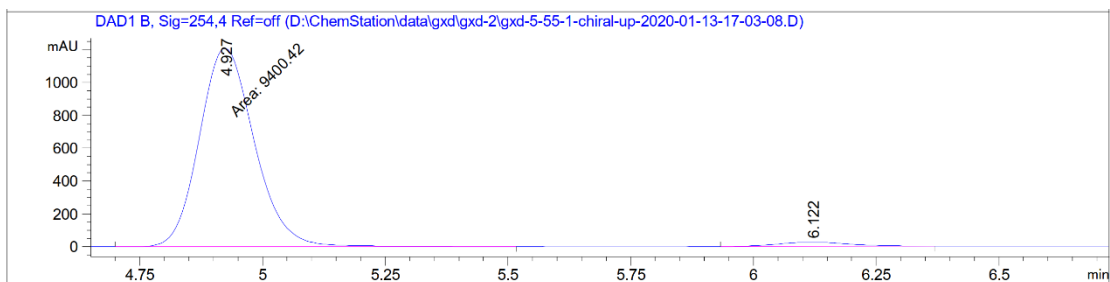

Signal 2: DAD1 B, Sig=254,4 Ref=off

| Peak # | RetTime [min] | Type | Width [min] | Area [mAU*s] | Height [mAU] | Area %  |
|--------|---------------|------|-------------|--------------|--------------|---------|
| 1      | 4.927         | MF   | 0.1293      | 9400.41504   | 1211.73926   | 97.4946 |
| 2      | 6.122         | BB   | 0.1517      | 241.56691    | 24.79122     | 2.5054  |

Totals : 9641.98195 1236.53048

### (2-(((2R,4R)-2-phenylchroman-4-yl)amino)phenyl)methanol (3ka')

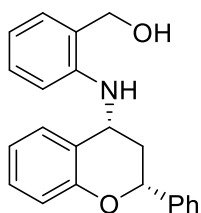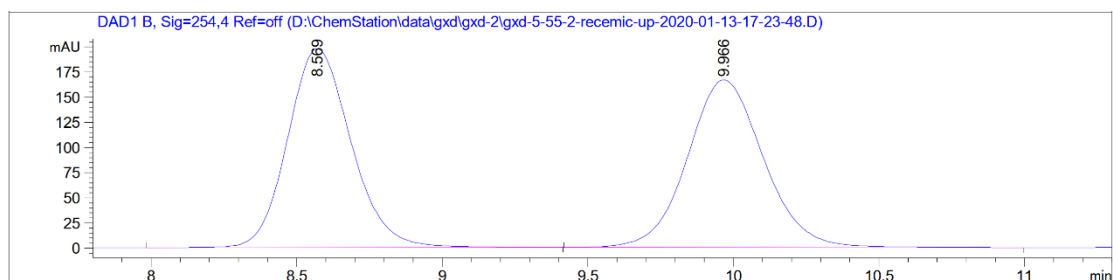

Signal 2: DAD1 B, Sig=254,4 Ref=off

| Peak # | RetTime [min] | Type | Width [min] | Area [mAU*s] | Height [mAU] | Area %  |
|--------|---------------|------|-------------|--------------|--------------|---------|
| 1      | 8.569         | BB   | 0.2330      | 2998.84106   | 197.68797    | 49.7428 |
| 2      | 9.966         | BB   | 0.2803      | 3029.84912   | 166.51379    | 50.2572 |

Totals : 6028.69019 364.20177

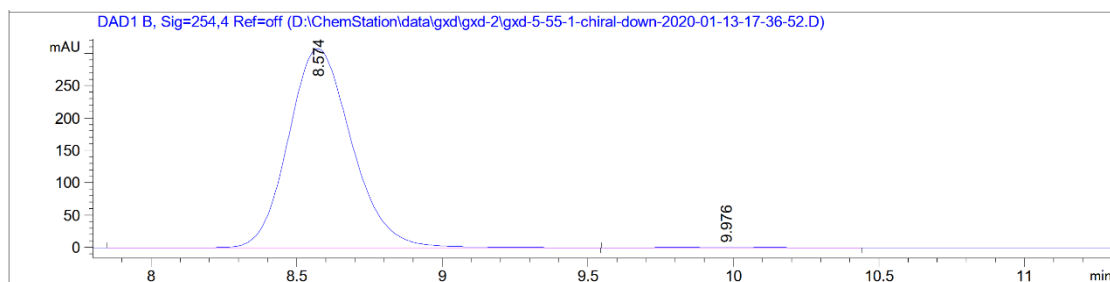

Signal 2: DAD1 B, Sig=254,4 Ref=off

| Peak # | RetTime [min] | Type | Width [min] | Area [mAU*s] | Height [mAU] | Area %  |
|--------|---------------|------|-------------|--------------|--------------|---------|
| 1      | 8.574         | BB   | 0.2345      | 4660.77490   | 308.00891    | 99.4447 |
| 2      | 9.976         | BB   | 0.2748      | 26.02396     | 1.38784      | 0.5553  |

Totals : 4686.79886 309.39675

### (2-(((3S,4R)-3-methylchroman-4-yl)amino)phenyl)methanol (3la)

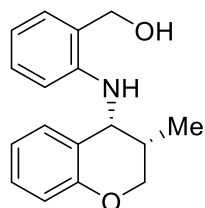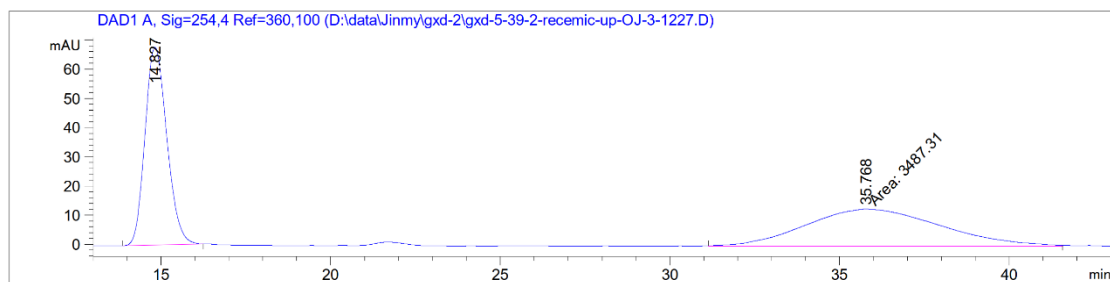

Signal 1: DAD1 A, Sig=254,4 Ref=360,100

| Peak # | RetTime [min] | Type | Width [min] | Area [mAU*s] | Height [mAU] | Area %  |
|--------|---------------|------|-------------|--------------|--------------|---------|
| 1      | 14.827        | BB   | 0.6961      | 3033.13452   | 67.77893     | 46.5173 |
| 2      | 35.768        | MM   | 4.5900      | 3487.31006   | 12.66272     | 53.4827 |

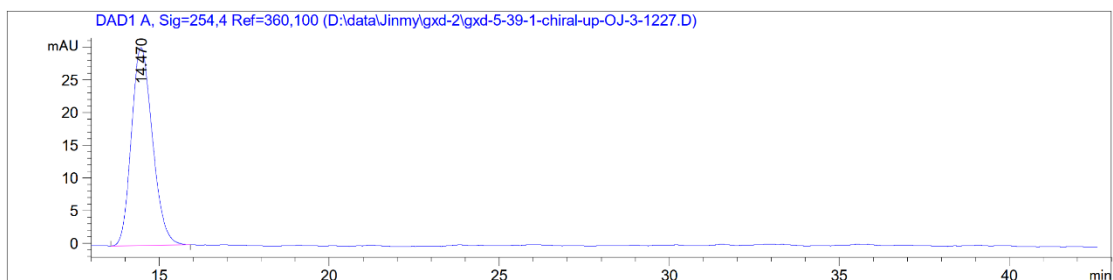

Signal 1: DAD1 A, Sig=254,4 Ref=360,100

| Peak # | RetTime [min] | Type | Width [min] | Area [mAU*s] | Height [mAU] | Area %   |
|--------|---------------|------|-------------|--------------|--------------|----------|
| 1      | 14.470        | BB   | 0.6707      | 1305.15381   | 30.28721     | 100.0000 |

Totals : 1305.15381 30.28721

### (2-(((3R,4R)-3-phenylchroman-4-yl)amino)phenyl)methanol (3ma)

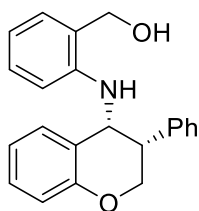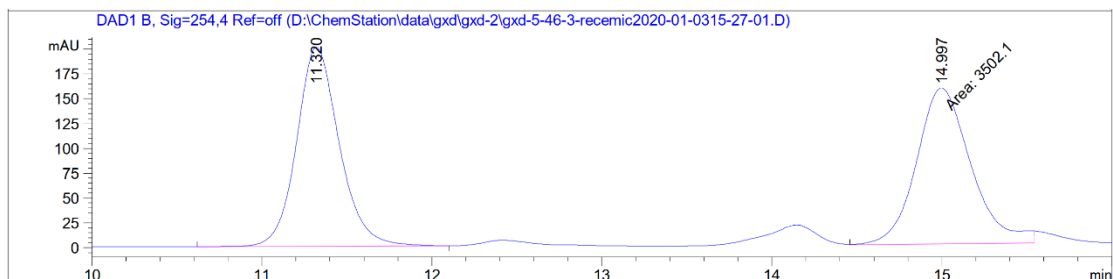

Signal 2: DAD1 B, Sig=254,4 Ref=off

| Peak # | RetTime [min] | Type | Width [min] | Area [mAU*s] | Height [mAU] | Area %  |
|--------|---------------|------|-------------|--------------|--------------|---------|
| 1      | 11.320        | BB   | 0.2636      | 3502.53931   | 200.74316    | 50.0031 |
| 2      | 14.997        | MF   | 0.3713      | 3502.10303   | 157.17912    | 49.9969 |

Totals : 7004.64233 357.92229

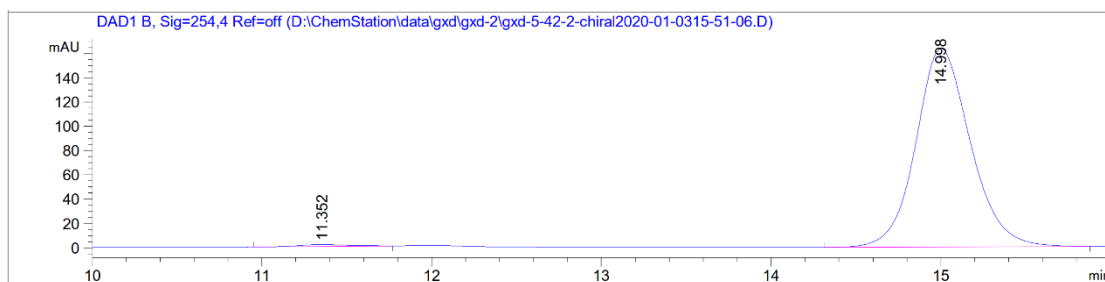

Signal 2: DAD1 B, Sig=254,4 Ref=off

| Peak # | RetTime [min] | Type | Width [min] | Area [mAU*s] | Height [mAU] | Area %  |
|--------|---------------|------|-------------|--------------|--------------|---------|
| 1      | 11.352        | BB   | 0.2940      | 31.04382     | 1.56096      | 0.8395  |
| 2      | 14.998        | BB   | 0.3392      | 3666.71924   | 163.79053    | 99.1605 |

Totals : 3697.76305 165.35149

### (R)-(2-(chroman-4-ylamino)-5-methoxyphenyl)methanol (3ab)

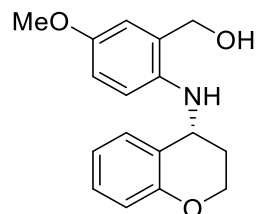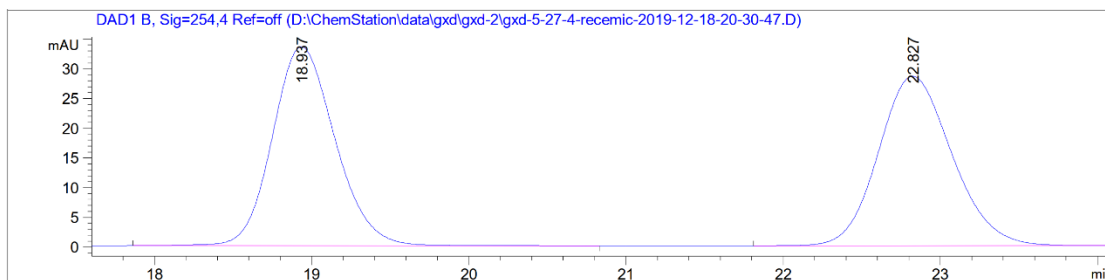

Signal 2: DAD1 B, Sig=254,4 Ref=off

| Peak # | RetTime [min] | Type | Width [min] | Area [mAU*s] | Height [mAU] | Area %  |
|--------|---------------|------|-------------|--------------|--------------|---------|
| 1      | 18.937        | BB   | 0.4287      | 933.20599    | 33.52590     | 50.0872 |
| 2      | 22.827        | BB   | 0.5061      | 929.95575    | 28.54382     | 49.9128 |

Totals : 1863.16174 62.06971

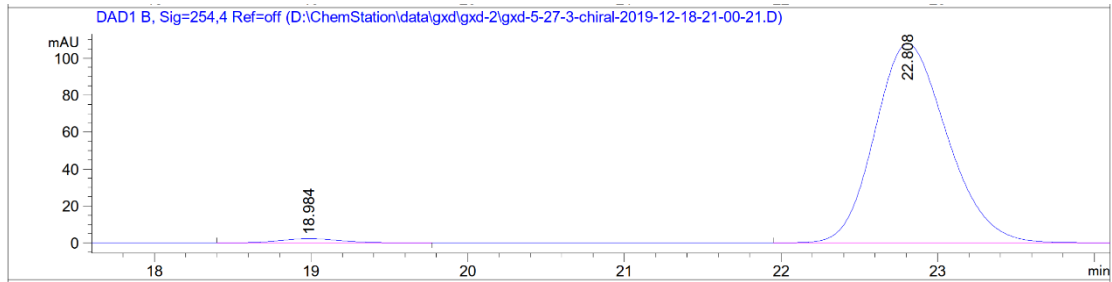

Signal 2: DAD1 B, Sig=254,4 Ref=off

| Peak # | RetTime [min] | Type | Width [min] | Area [mAU*s] | Height [mAU] | Area %  |
|--------|---------------|------|-------------|--------------|--------------|---------|
| 1      | 18.984        | BB   | 0.4022      | 59.94406     | 2.25434      | 1.7055  |
| 2      | 22.808        | BB   | 0.4984      | 3454.88818   | 107.65407    | 98.2945 |

Totals : 3514.83224 109.90841

**(R)-4-(chroman-4-ylamino)-3-(hydroxymethyl)phenyl acetate (3ac)**

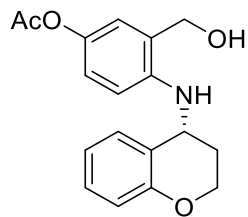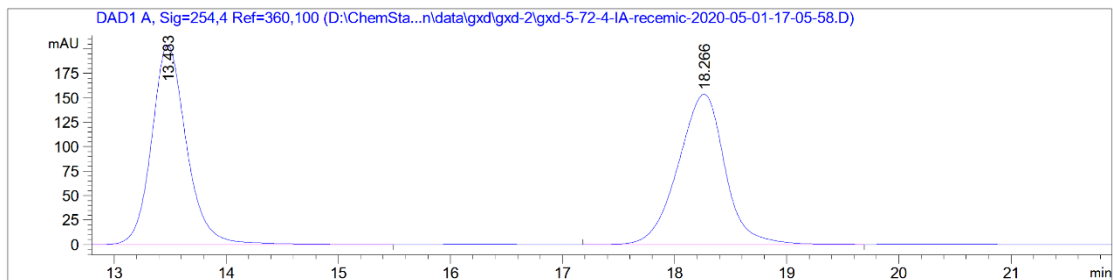



Signal 1: DAD1 A, Sig=254,4 Ref=360,100

| Peak # | RetTime [min] | Type | Width [min] | Area [mAU*s] | Height [mAU] | Area %  |
|--------|---------------|------|-------------|--------------|--------------|---------|
| 1      | 13.483        | BB   | 0.3259      | 4405.81934   | 204.02747    | 49.7587 |
| 2      | 18.266        | BB   | 0.4436      | 4448.55127   | 153.71765    | 50.2413 |

Totals : 8854.37061 357.74512

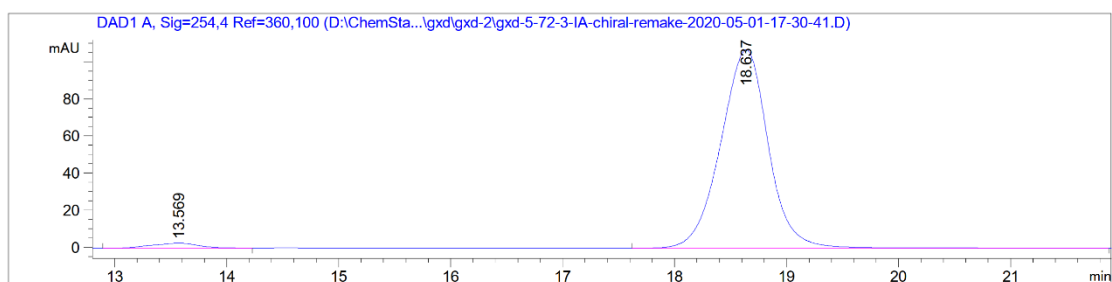

Signal 1: DAD1 A, Sig=254,4 Ref=360,100

| Peak # | RetTime [min] | Type | Width [min] | Area [mAU*s] | Height [mAU] | Area %  |
|--------|---------------|------|-------------|--------------|--------------|---------|
| 1      | 13.569        | BB   | 0.4056      | 77.30832     | 2.70368      | 2.3821  |
| 2      | 18.637        | BB   | 0.4536      | 3168.10620   | 106.95918    | 97.6179 |

Totals : 3245.41452 109.66285

### (R)-(2-(chroman-4-ylamino)-5-fluorophenyl)methanol (3ad)

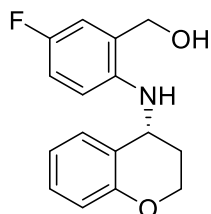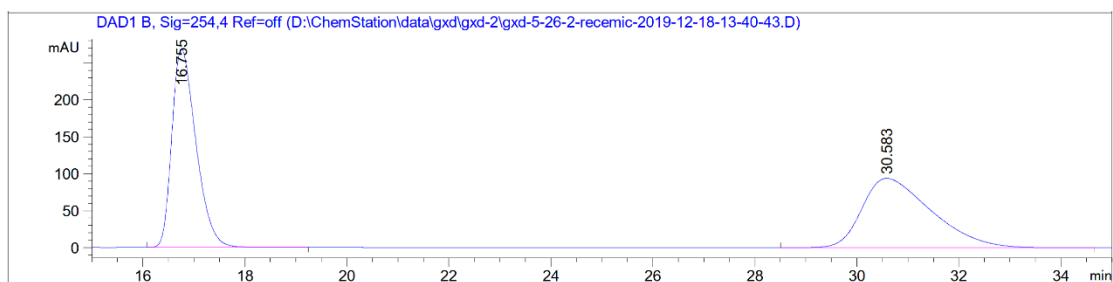

Signal 2: DAD1 B, Sig=254,4 Ref=off

| Peak # | RetTime [min] | Type | Width [min] | Area [mAU*s] | Height [mAU] | Area %  |
|--------|---------------|------|-------------|--------------|--------------|---------|
| 1      | 16.755        | BB   | 0.5048      | 8811.22852   | 268.55930    | 49.9336 |
| 2      | 30.583        | BB   | 1.4182      | 8834.64746   | 93.85553     | 50.0664 |

Totals : 1.76459e4 362.41483

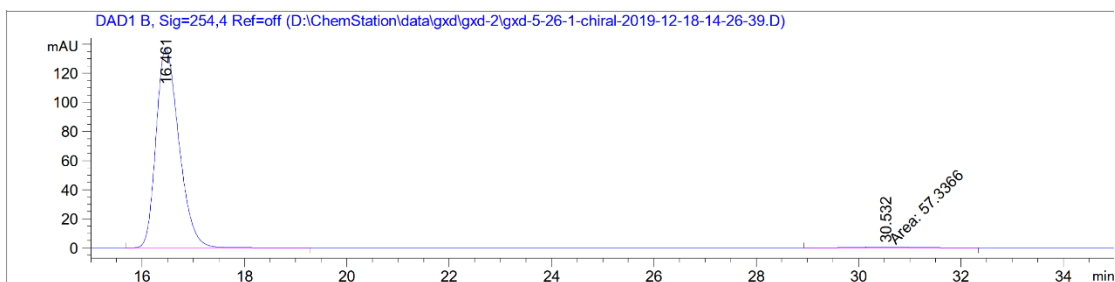

Signal 2: DAD1 B, Sig=254,4 Ref=off

| Peak # | RetTime [min] | Type | Width [min] | Area [mAU*s] | Height [mAU] | Area %  |
|--------|---------------|------|-------------|--------------|--------------|---------|
| 1      | 16.461        | BB   | 0.4784      | 4277.69043   | 137.69296    | 98.6774 |
| 2      | 30.532        | MM   | 1.5101      | 57.33657     | 6.32825e-1   | 1.3226  |

Totals : 4335.02700 138.32579

### (R)-(5-chloro-2-(chroman-4-ylamino)phenyl)methanol (3ae)

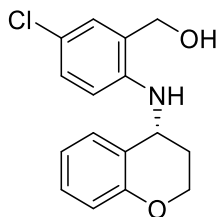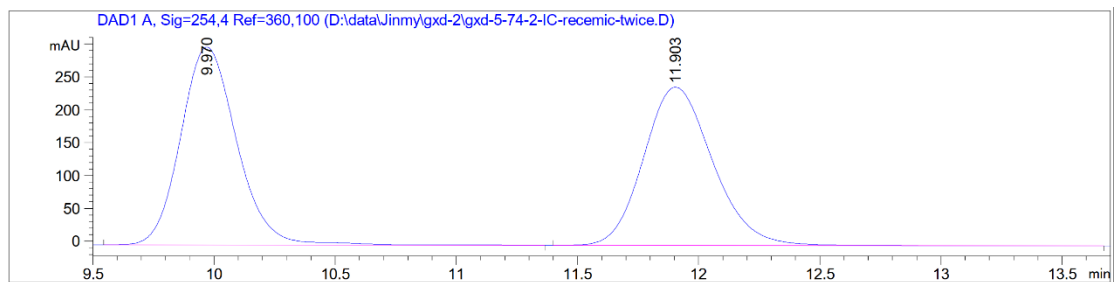

Signal 1: DAD1 A, Sig=254,4 Ref=360,100

| Peak # | RetTime [min] | Type | Width [min] | Area [mAU*s] | Height [mAU] | Area %  |
|--------|---------------|------|-------------|--------------|--------------|---------|
| 1      | 9.970         | BB   | 0.2478      | 4842.10791   | 300.84753    | 50.3759 |
| 2      | 11.903        | BB   | 0.3071      | 4769.85107   | 240.76421    | 49.6241 |

Totals : 9611.95898 541.61174

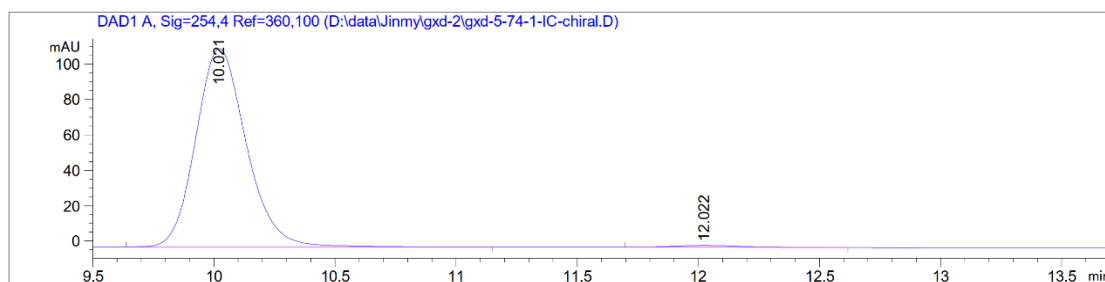

Signal 1: DAD1 A, Sig=254,4 Ref=360,100

| Peak # | RetTime [min] | Type | Width [min] | Area [mAU*s] | Height [mAU] | Area %  |
|--------|---------------|------|-------------|--------------|--------------|---------|
| 1      | 10.021        | BB   | 0.2227      | 1622.10889   | 112.17372    | 98.7646 |
| 2      | 12.022        | BB   | 0.2881      | 20.28997     | 1.08531      | 1.2354  |

Totals : 1642.39886 113.25903

### (R)-(5-bromo-2-(chroman-4-ylamino)phenyl)methanol (3af)

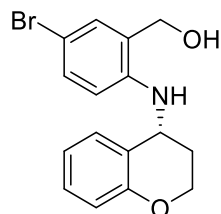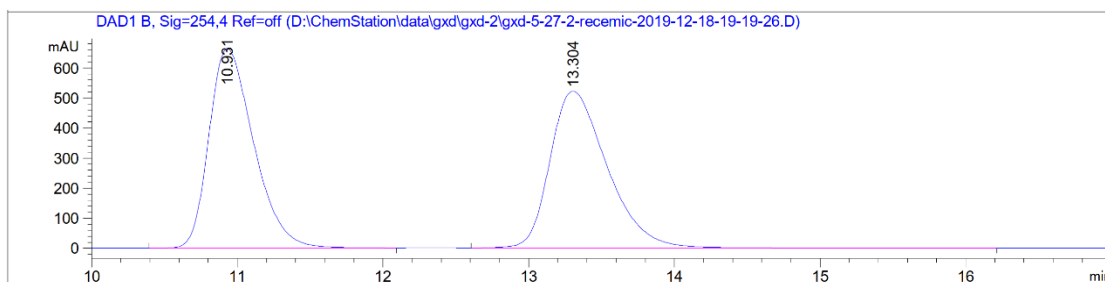

Signal 2: DAD1 B, Sig=254,4 Ref=off

| Peak # | RetTime [min] | Type | Width [min] | Area [mAU*s] | Height [mAU] | Area %  |
|--------|---------------|------|-------------|--------------|--------------|---------|
| 1      | 10.931        | BB   | 0.3282      | 1.41281e4    | 664.18909    | 49.8324 |
| 2      | 13.304        | BB   | 0.4182      | 1.42232e4    | 521.45111    | 50.1676 |

Totals : 2.83513e4 1185.64020

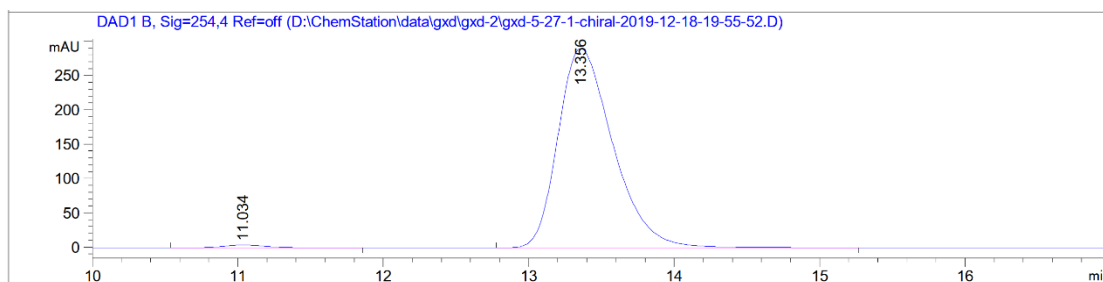

Signal 2: DAD1 B, Sig=254,4 Ref=off

| Peak # | RetTime [min] | Type | Width [min] | Area [mAU*s] | Height [mAU] | Area %  |
|--------|---------------|------|-------------|--------------|--------------|---------|
| 1      | 11.034        | BB   | 0.3195      | 84.88226     | 4.10124      | 1.1038  |
| 2      | 13.356        | BB   | 0.4018      | 7604.99365   | 290.14716    | 98.8962 |

Totals : 7689.87591 294.24840

### (R)-(2-(chroman-4-ylamino)-4-fluorophenyl)methanol (3ag)

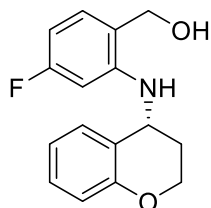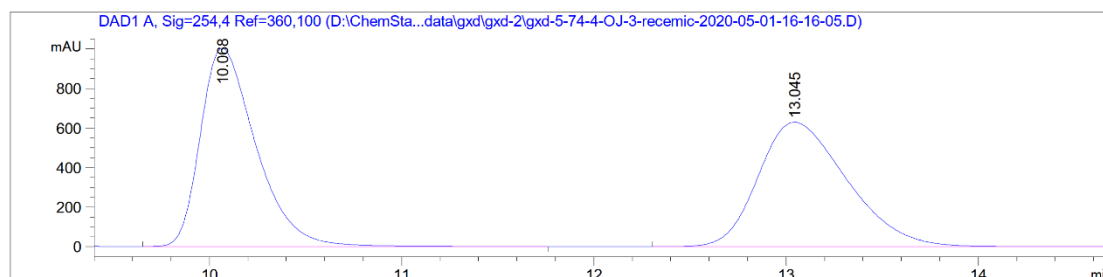

Signal 1: DAD1 A, Sig=254,4 Ref=360,100

| Peak # | RetTime [min] | Type | Width [min] | Area [mAU*s] | Height [mAU] | Area %  |
|--------|---------------|------|-------------|--------------|--------------|---------|
| 1      | 10.068        | BB   | 0.3058      | 2.00757e4    | 1001.88452   | 49.9133 |
| 2      | 13.045        | BB   | 0.4959      | 2.01454e4    | 628.66577    | 50.0867 |

Totals : 4.02211e4 1630.55029

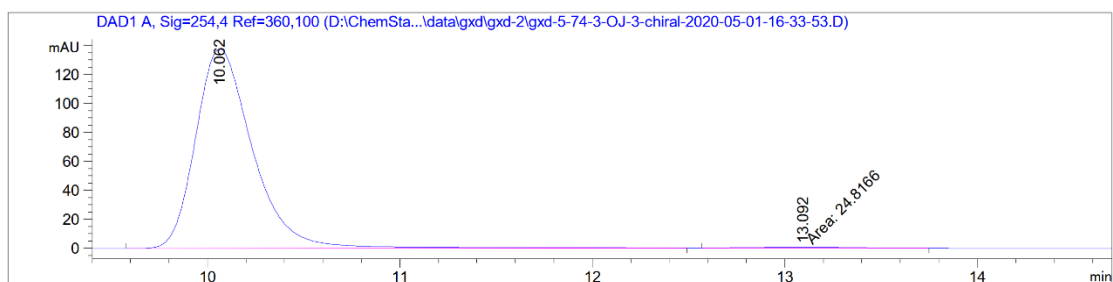

Signal 1: DAD1 A, Sig=254,4 Ref=360,100

| Peak # | RetTime [min] | Type | Width [min] | Area [mAU*s] | Height [mAU] | Area %  |
|--------|---------------|------|-------------|--------------|--------------|---------|
| 1      | 10.062        | BB   | 0.3128      | 2845.87183   | 137.89563    | 99.1355 |
| 2      | 13.092        | MM   | 0.5337      | 24.81657     | 7.75027e-1   | 0.8645  |

Totals : 2870.68839 138.67066

### (R)-(4-chloro-2-(chroman-4-ylamino)phenyl)methanol (3ah)

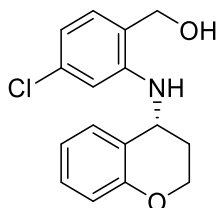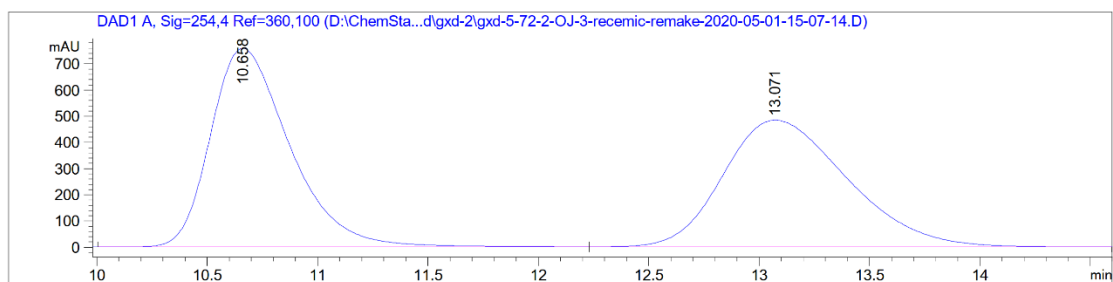

Signal 1: DAD1 A, Sig=254,4 Ref=360,100

| Peak # | RetTime [min] | Type | Width [min] | Area [mAU*s] | Height [mAU] | Area %  |
|--------|---------------|------|-------------|--------------|--------------|---------|
| 1      | 10.658        | BB   | 0.3806      | 1.88868e4    | 758.30756    | 49.9520 |
| 2      | 13.071        | BB   | 0.6061      | 1.89231e4    | 484.03149    | 50.0480 |

Totals : 3.78099e4 1242.33905

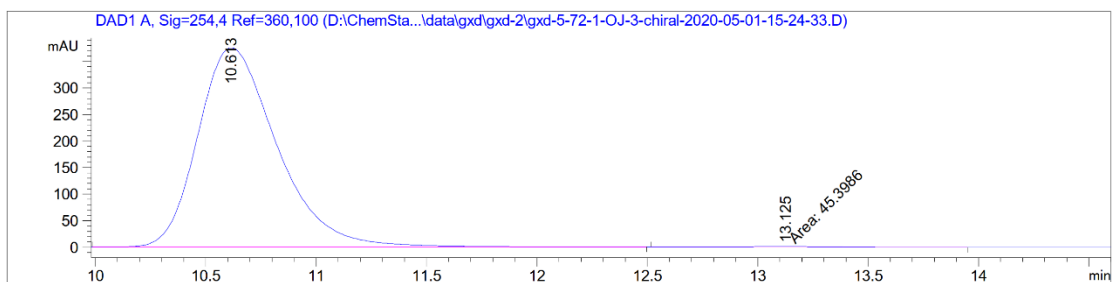

Signal 1: DAD1 A, Sig=254,4 Ref=360,100

| Peak # | RetTime [min] | Type | Width [min] | Area [mAU*s] | Height [mAU] | Area %  |
|--------|---------------|------|-------------|--------------|--------------|---------|
| 1      | 10.613        | BB   | 0.3835      | 9380.04297   | 375.46530    | 99.5183 |
| 2      | 13.125        | MM   | 0.6191      | 45.39859     | 1.22210      | 0.4817  |

Totals : 9425.44156 376.68740

### (R)-(4-bromo-2-(chroman-4-ylamino)phenyl)methanol (3ai)

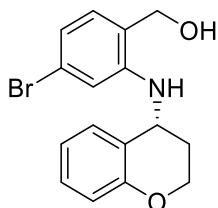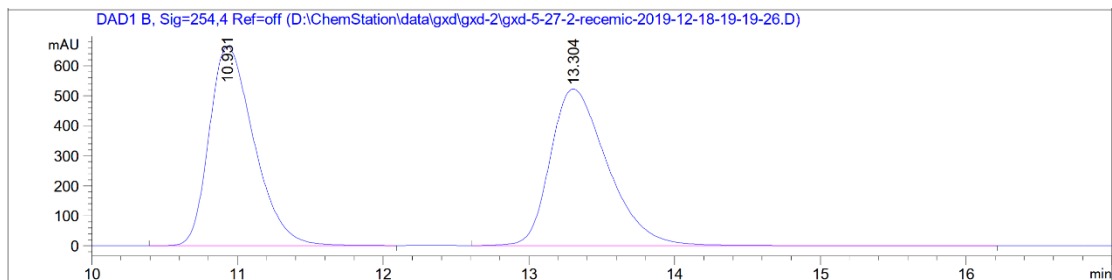

Signal 2: DAD1 B, Sig=254,4 Ref=off

| Peak # | RetTime [min] | Type | Width [min] | Area [mAU*s] | Height [mAU] | Area %  |
|--------|---------------|------|-------------|--------------|--------------|---------|
| 1      | 10.931        | BB   | 0.3282      | 1.41281e4    | 664.18909    | 49.8324 |
| 2      | 13.304        | BB   | 0.4182      | 1.42232e4    | 521.45111    | 50.1676 |

Totals : 2.83513e4 1185.64020

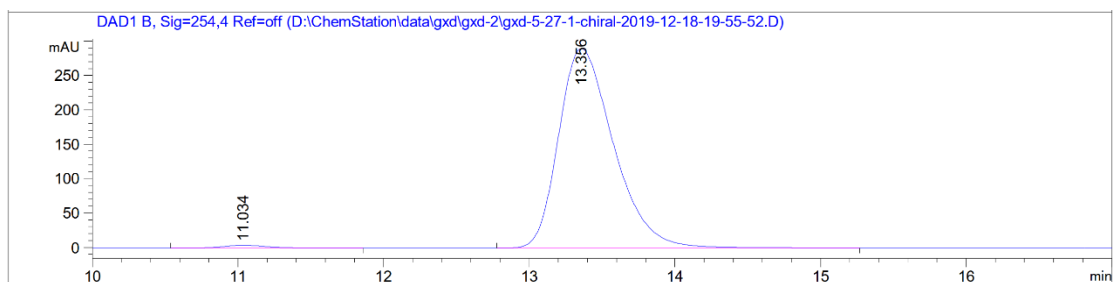

Signal 2: DAD1 B, Sig=254,4 Ref=off

| Peak # | RetTime [min] | Type | Width [min] | Area [mAU*s] | Height [mAU] | Area %  |
|--------|---------------|------|-------------|--------------|--------------|---------|
| 1      | 11.034        | BB   | 0.3195      | 84.88226     | 4.10124      | 1.1038  |
| 2      | 13.356        | BB   | 0.4018      | 7604.99365   | 290.14716    | 98.8962 |

Totals : 7689.87591 294.24840

### (R)-(2-bromo-6-(chroman-4-ylamino)phenyl)methanol (3aj)

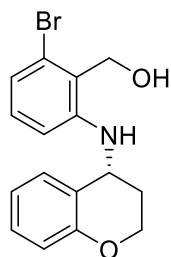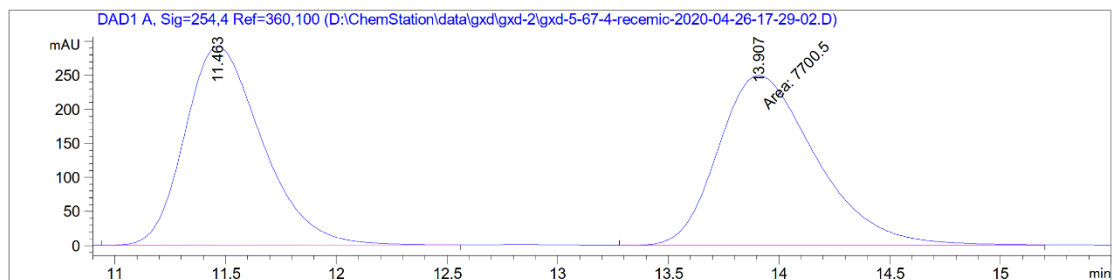

Signal 1: DAD1 A, Sig=254,4 Ref=360,100

| Peak # | RetTime [min] | Type | Width [min] | Area [mAU*s] | Height [mAU] | Area %  |
|--------|---------------|------|-------------|--------------|--------------|---------|
| 1      | 11.463        | BB   | 0.3732      | 7082.60791   | 291.73959    | 47.9101 |
| 2      | 13.907        | MF   | 0.5145      | 7700.49902   | 249.46124    | 52.0899 |

Totals : 1.47831e4 541.20084

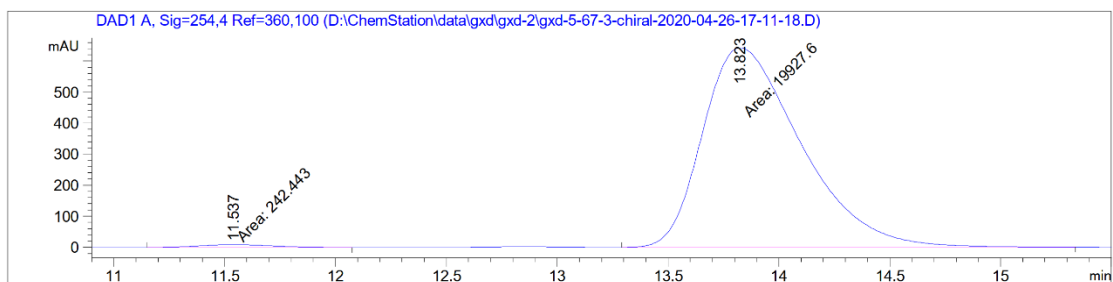

Signal 1: DAD1 A, Sig=254,4 Ref=360,100

| Peak # | RetTime [min] | Type | Width [min] | Area [mAU*s] | Height [mAU] | Area %  |
|--------|---------------|------|-------------|--------------|--------------|---------|
| 1      | 11.537        | MM   | 0.4205      | 242.44342    | 9.60848      | 1.2020  |
| 2      | 13.823        | MM   | 0.5154      | 1.99276e4    | 644.36890    | 98.7980 |

Totals : 2.01701e4 653.97738

### (R)-(2-(chroman-4-ylamino)-4,5-dimethoxyphenyl)methanol (3ak)

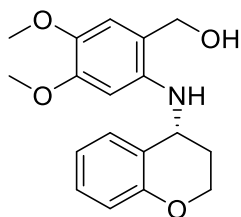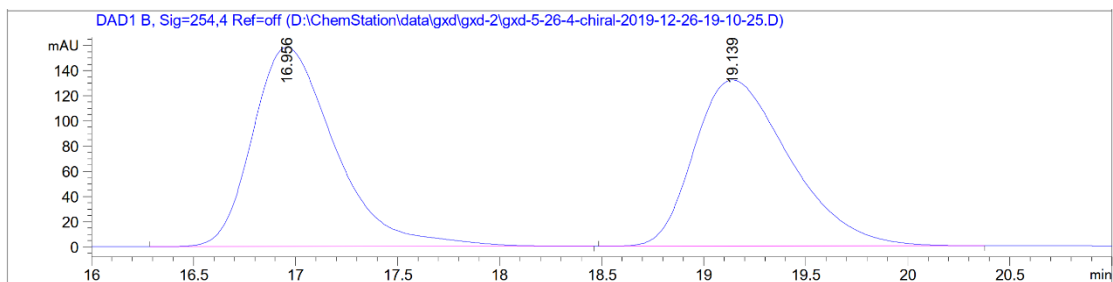



Signal 2: DAD1 B, Sig=254,4 Ref=off

| Peak # | RetTime [min] | Type | Width [min] | Area [mAU*s] | Height [mAU] | Area %  |
|--------|---------------|------|-------------|--------------|--------------|---------|
| 1      | 16.956        | BB   | 0.4299      | 4452.34424   | 158.39125    | 50.8828 |
| 2      | 19.139        | BB   | 0.5017      | 4297.84570   | 132.04735    | 49.1172 |

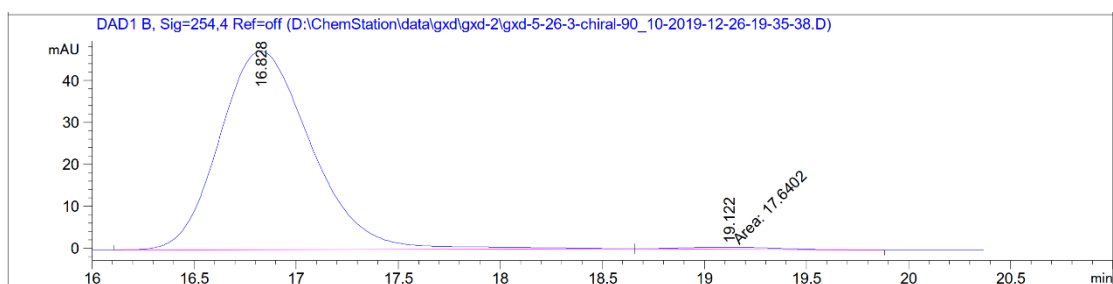

Signal 2: DAD1 B, Sig=254,4 Ref=off

| Peak # | RetTime [min] | Type | Width [min] | Area [mAU*s] | Height [mAU] | Area %  |
|--------|---------------|------|-------------|--------------|--------------|---------|
| 1      | 16.828        | BB   | 0.4830      | 1483.79126   | 47.42852     | 98.8251 |
| 2      | 19.122        | MM   | 0.5437      | 17.64017     | 5.40724e-1   | 1.1749  |

Totals : 1501.43143 47.96924

### (R)-(4-bromo-2-(chroman-4-ylamino)phenyl)methanol (3a)

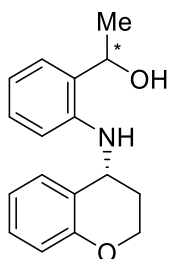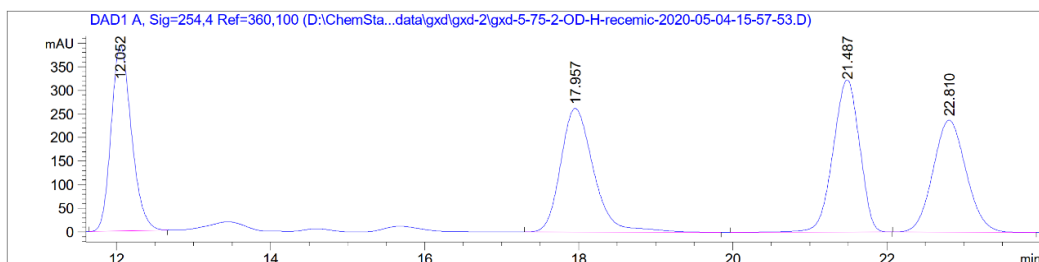

Signal 1: DAD1 A, Sig=254,4 Ref=360,100

| Peak # | RetTime [min] | Type | Width [min] | Area [mAU*s] | Height [mAU] | Area %  |
|--------|---------------|------|-------------|--------------|--------------|---------|
| 1      | 12.052        | BB   | 0.2817      | 7206.12744   | 393.37830    | 24.2169 |
| 2      | 17.957        | BB   | 0.4563      | 7775.44043   | 261.95740    | 26.1302 |
| 3      | 21.487        | BB   | 0.3642      | 7695.20117   | 322.75977    | 25.8605 |
| 4      | 22.810        | BB   | 0.4621      | 7079.80176   | 237.26437    | 23.7924 |

Totals : 2.97566e4 1215.35983

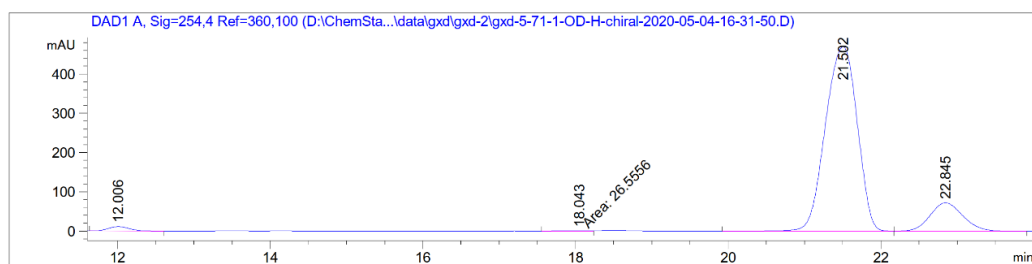

Signal 1: DAD1 A, Sig=254,4 Ref=360,100

| Peak # | RetTime [min] | Type | Width [min] | Area [mAU*s] | Height [mAU] | Area %  |
|--------|---------------|------|-------------|--------------|--------------|---------|
| 1      | 12.006        | BB   | 0.3030      | 216.34616    | 11.21551     | 1.3546  |
| 2      | 18.043        | MM   | 0.4099      | 26.55558     | 1.07970      | 0.1663  |
| 3      | 21.502        | BB   | 0.4648      | 1.35828e4    | 470.44107    | 85.0457 |
| 4      | 22.845        | BB   | 0.4611      | 2145.47900   | 72.11691     | 13.4334 |

Totals : 1.59712e4 554.85319

### (4-chloro-2-(((R)-chroman-4-yl)amino)phenyl)(phenyl)methanol (3am)

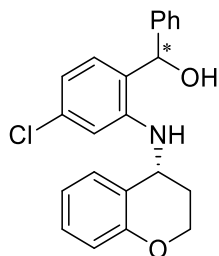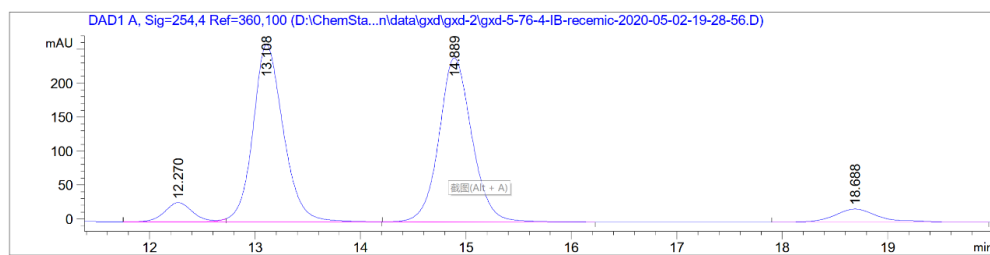

Signal 1: DAD1 A, Sig=254,4 Ref=360,100

| Peak # | RetTime [min] | Type | Width [min] | Area [mAU*s] | Height [mAU] | Area %  |
|--------|---------------|------|-------------|--------------|--------------|---------|
| 1      | 12.270        | BV E | 0.2765      | 516.12323    | 28.33297     | 4.4736  |
| 2      | 13.108        | VB R | 0.3034      | 5229.89404   | 261.38773    | 45.3315 |
| 3      | 14.889        | BB   | 0.3282      | 5226.50049   | 241.81271    | 45.3021 |
| 4      | 18.688        | BB   | 0.4349      | 564.48114    | 19.43325     | 4.8928  |

Totals : 1.15370e4 550.96666

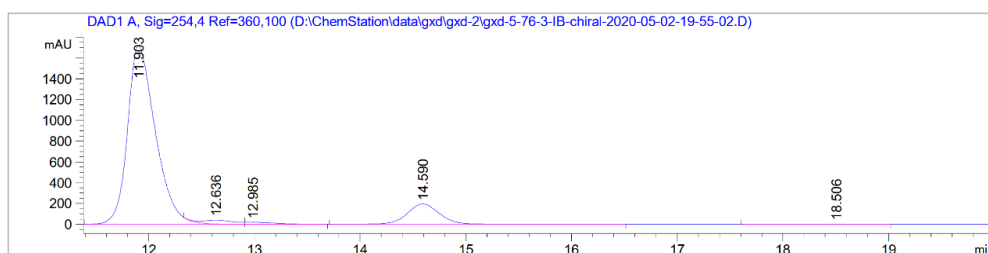

Signal 1: DAD1 A, Sig=254,4 Ref=360,100

| Peak # | RetTime [min] | Type | Width [min] | Area [mAU*s] | Height [mAU] | Area %  |
|--------|---------------|------|-------------|--------------|--------------|---------|
| 1      | 11.903        | BV R | 0.2757      | 3.14211e4    | 1715.56531   | 85.4114 |
| 2      | 12.636        | VV E | 0.2950      | 748.07092    | 36.51688     | 2.0335  |
| 3      | 12.985        | VB E | 0.2932      | 357.08893    | 18.50089     | 0.9707  |
| 4      | 14.590        | BB   | 0.3256      | 4196.40918   | 196.17961    | 11.4070 |
| 5      | 18.506        | BB   | 0.3976      | 65.28155     | 2.41355      | 0.1775  |

Totals : 3.67880e4 1969.17623

### (R)-1-(2-(chroman-4-ylamino)phenyl)ethan-1-one (3al')

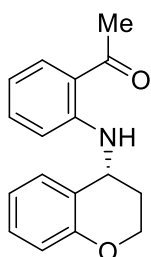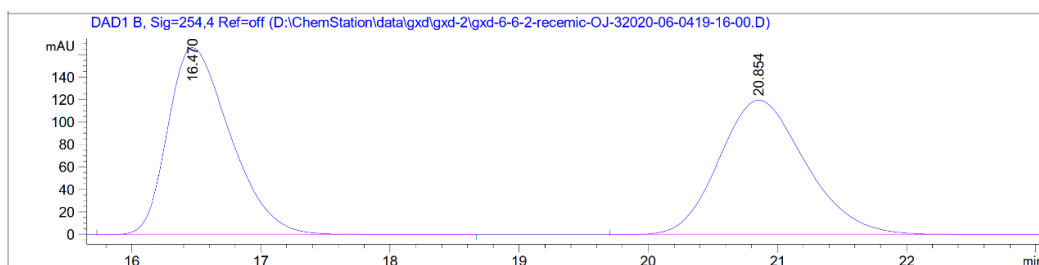

Signal 2: DAD1 B, Sig=254,4 Ref=off

| Peak # | RetTime [min] | Type | Width [min] | Area [mAU*s] | Height [mAU] | Area %  |
|--------|---------------|------|-------------|--------------|--------------|---------|
| 1      | 16.470        | BB   | 0.5177      | 5590.75049   | 166.50044    | 49.9907 |
| 2      | 20.854        | BBA  | 0.7192      | 5592.82520   | 119.69013    | 50.0093 |

Totals : 1.11836e4 286.19057

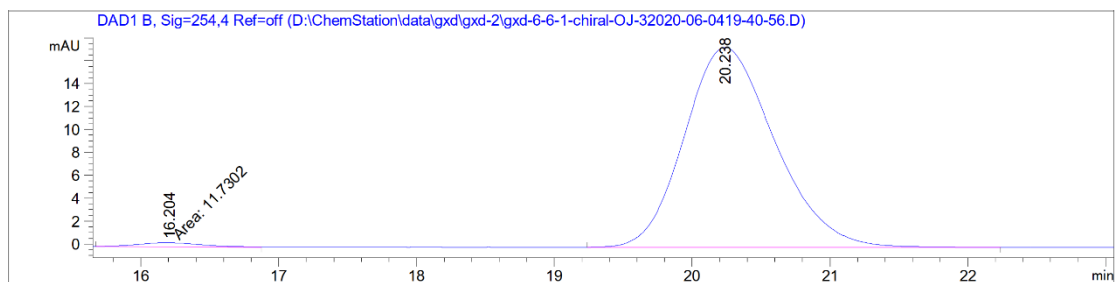

Signal 2: DAD1 B, Sig=254,4 Ref=off

| Peak # | RetTime [min] | Type | Width [min] | Area [mAU*s] | Height [mAU] | Area %  |
|--------|---------------|------|-------------|--------------|--------------|---------|
| 1      | 16.204        | MM   | 0.5541      | 11.73015     | 3.52807e-1   | 1.4533  |
| 2      | 20.238        | BB   | 0.6937      | 795.39874    | 17.45280     | 98.5467 |

Totals : 807.12890 17.80561

**(R)-(4-chloro-2-(chroman-4-ylamino)phenyl)(phenyl)methanone (3am')**

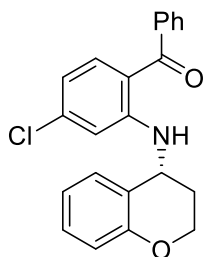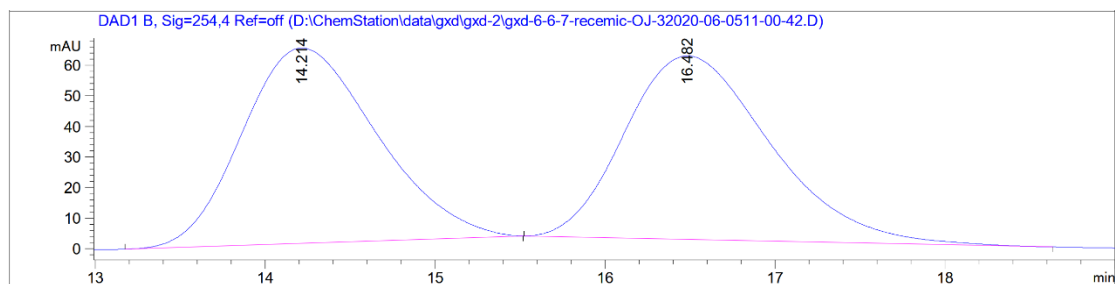

Signal 2: DAD1 B, Sig=254,4 Ref=off

| Peak # | RetTime [min] | Type | Width [min] | Area [mAU*s] | Height [mAU] | Area %  |
|--------|---------------|------|-------------|--------------|--------------|---------|
| 1      | 14.214        | BB   | 0.8488      | 3521.58472   | 63.91703     | 49.6062 |
| 2      | 16.482        | BB   | 0.9172      | 3577.49658   | 60.03707     | 50.3938 |

Totals : 7099.08130 123.95410

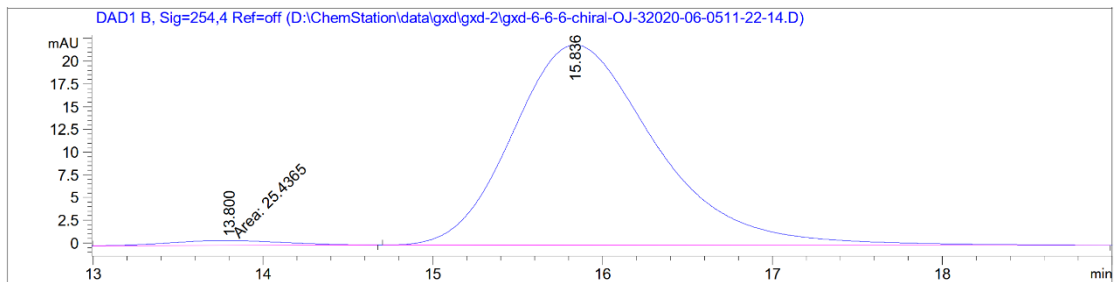

Signal 2: DAD1 B, Sig=254,4 Ref=off

| Peak # | RetTime [min] | Type | Width [min] | Area [mAU*s] | Height [mAU] | Area %  |
|--------|---------------|------|-------------|--------------|--------------|---------|
| 1      | 13.800        | MM   | 0.7791      | 25.43647     | 5.44153e-1   | 1.9319  |
| 2      | 15.836        | BB   | 0.8836      | 1291.20459   | 22.03764     | 98.0681 |

Totals : 1316.64106 22.58179

### (R)-(2-(thiochroman-4-ylamino)phenyl)methanol (3na)

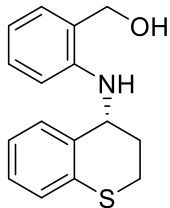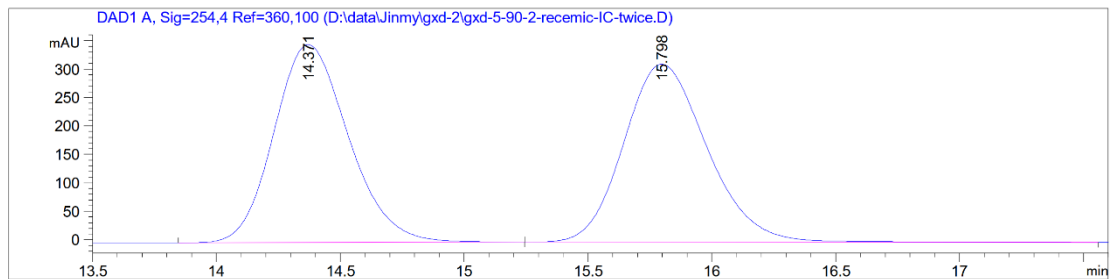

Signal 1: DAD1 A, Sig=254,4 Ref=360,100

| Peak # | RetTime [min] | Type | Width [min] | Area [mAU*s] | Height [mAU] | Area %  |
|--------|---------------|------|-------------|--------------|--------------|---------|
| 1      | 14.371        | BB   | 0.3243      | 7286.68066   | 348.02106    | 49.9075 |
| 2      | 15.798        | BB   | 0.3608      | 7313.68164   | 312.83505    | 50.0925 |

Totals : 1.46004e4 660.85611

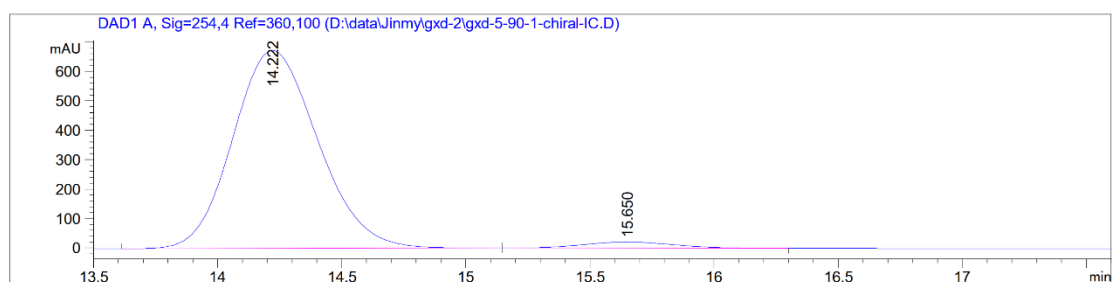

Signal 1: DAD1 A, Sig=254,4 Ref=360,100

| Peak # | RetTime [min] | Type | Width [min] | Area [mAU*s] | Height [mAU] | Area %  |
|--------|---------------|------|-------------|--------------|--------------|---------|
| 1      | 14.222        | BB   | 0.3699      | 1.60285e4    | 672.98535    | 96.7826 |
| 2      | 15.650        | BB   | 0.3964      | 532.83881    | 20.97133     | 3.2174  |

Totals : 1.65613e4 693.95668

### (R)-(4-fluoro-2-(thiochroman-4-ylamino)phenyl)methanol (3ng)

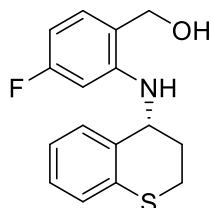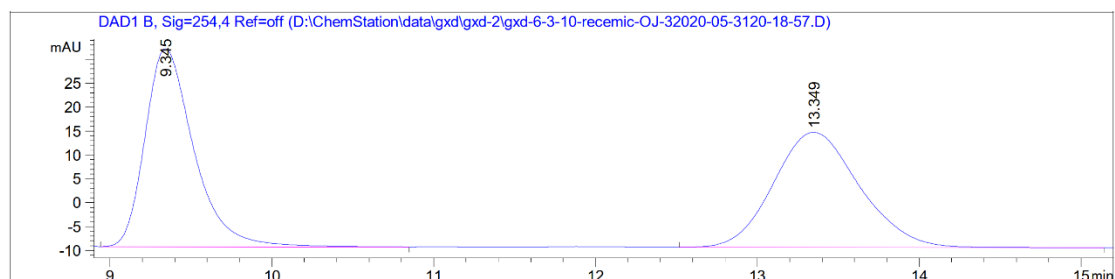

Signal 2: DAD1 B, Sig=254,4 Ref=off

| Peak # | RetTime [min] | Type | Width [min] | Area [mAU*s] | Height [mAU] | Area %  |
|--------|---------------|------|-------------|--------------|--------------|---------|
| 1      | 9.345         | BB   | 0.3181      | 867.02393    | 41.44741     | 49.3346 |
| 2      | 13.349        | BB   | 0.5628      | 890.41193    | 24.11416     | 50.6654 |

Totals : 1757.43585 65.56157

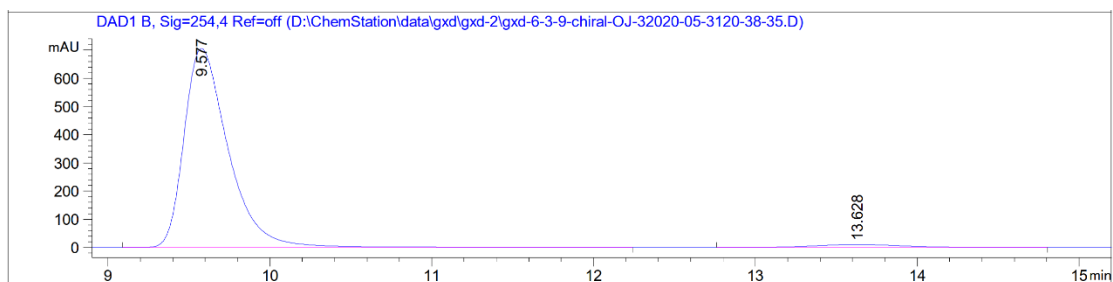

Signal 2: DAD1 B, Sig=254,4 Ref=off

| Peak # | RetTime [min] | Type | Width [min] | Area [mAU*s] | Height [mAU] | Area %  |
|--------|---------------|------|-------------|--------------|--------------|---------|
| 1      | 9.577         | BB   | 0.2870      | 1.33771e4    | 706.02710    | 97.2703 |
| 2      | 13.628        | BB   | 0.5619      | 375.40225    | 10.23566     | 2.7297  |

Totals : 1.37525e4 716.26276

### **(R)-(4-chloro-2-(thiochroman-4-ylamino)phenyl)methanol (3nh)**

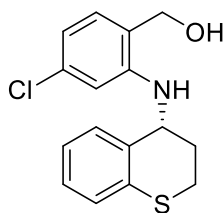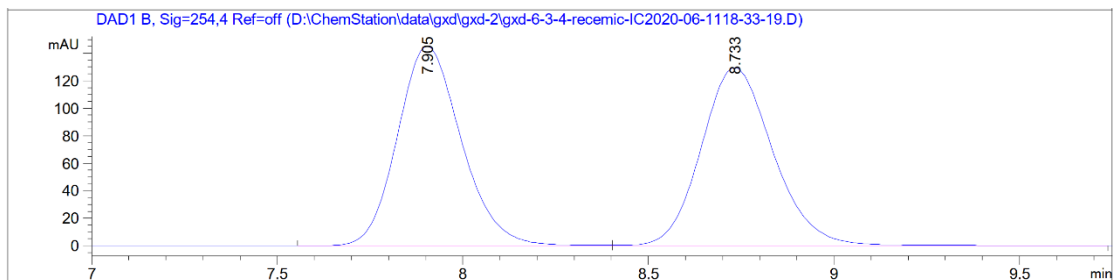

Signal 2: DAD1 B, Sig=254,4 Ref=off

| Peak # | RetTime [min] | Type | Width [min] | Area [mAU*s] | Height [mAU] | Area %  |
|--------|---------------|------|-------------|--------------|--------------|---------|
| 1      | 7.905         | BV   | 0.1833      | 1734.38635   | 145.21967    | 49.8484 |
| 2      | 8.733         | VB   | 0.2071      | 1744.93274   | 129.59984    | 50.1516 |

Totals : 3479.31909 274.81950

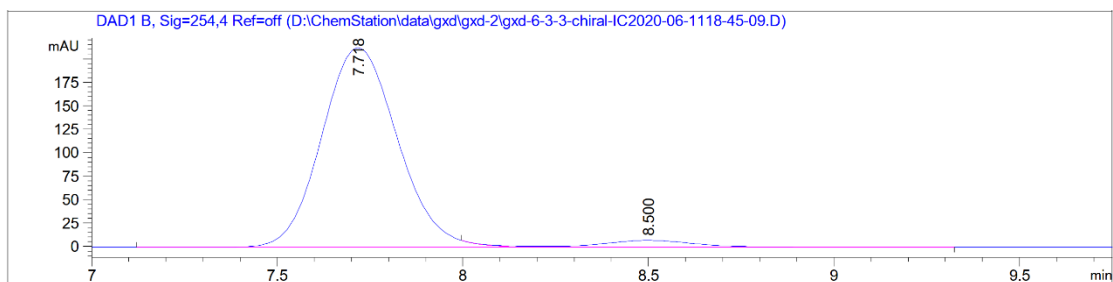

Signal 2: DAD1 B, Sig=254,4 Ref=off

| Peak # | RetTime [min] | Type | Width [min] | Area [mAU*s] | Height [mAU] | Area %  |
|--------|---------------|------|-------------|--------------|--------------|---------|
| 1      | 7.718         | BV R | 0.2217      | 3019.64307   | 212.62964    | 95.7573 |
| 2      | 8.500         | VB E | 0.2761      | 133.79126    | 7.29035      | 4.2427  |

Totals : 3153.43433 219.91999

### (R)-(5-bromo-2-(thiochroman-4-ylamino)phenyl)methanol (3nf)

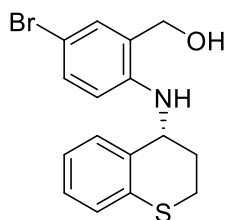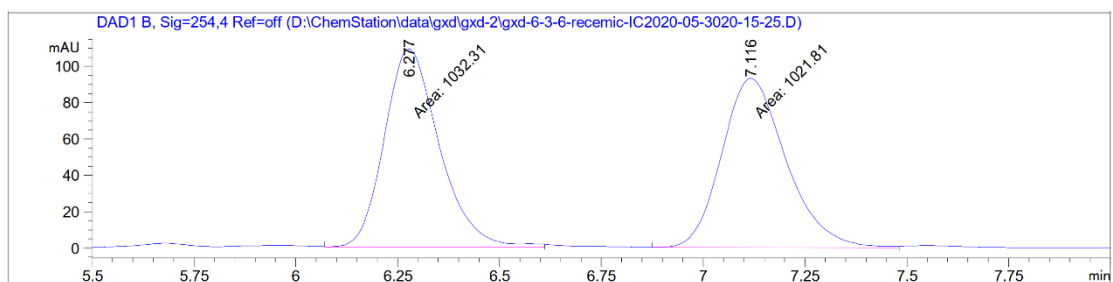



Signal 2: DAD1 B, Sig=254,4 Ref=off

| Peak # | RetTime [min] | Type | Width [min] | Area [mAU*s] | Height [mAU] | Area %  |
|--------|---------------|------|-------------|--------------|--------------|---------|
| 1      | 6.277         | MF   | 0.1572      | 1032.31177   | 109.41663    | 50.2556 |
| 2      | 7.116         | MF   | 0.1828      | 1021.81226   | 93.15769     | 49.7444 |

Totals : 2054.12402 202.57432

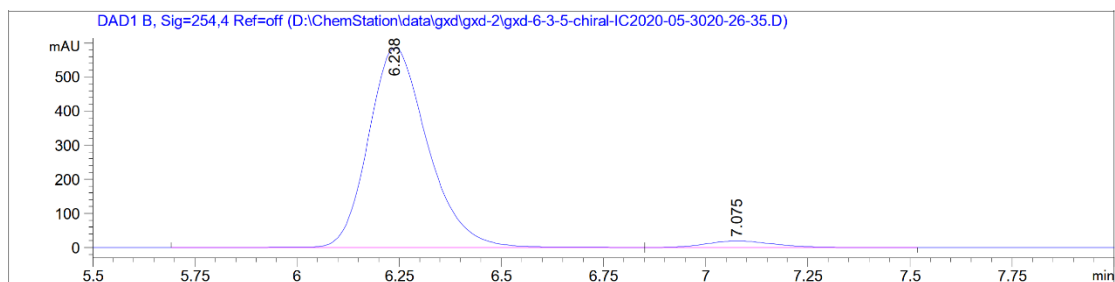

Signal 2: DAD1 B, Sig=254,4 Ref=off

| Peak # | RetTime [min] | Type | Width [min] | Area [mAU*s] | Height [mAU] | Area %  |
|--------|---------------|------|-------------|--------------|--------------|---------|
| 1      | 6.238         | BV   | 0.1536      | 5906.92236   | 586.04376    | 96.2941 |
| 2      | 7.075         | VB   | 0.1806      | 227.32938    | 19.40930     | 3.7059  |

Totals : 6134.25174 605.45306

### (R)-(2-bromo-6-(thiochroman-4-ylamino)phenyl)methanol (3nj)

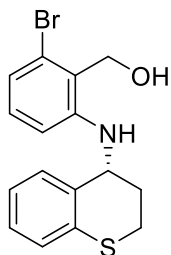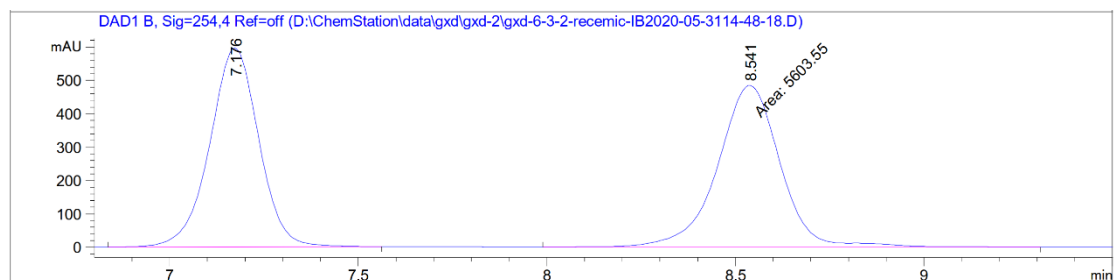

Signal 2: DAD1 B, Sig=254,4 Ref=off

| Peak # | RetTime [min] | Type | Width [min] | Area [mAU*s] | Height [mAU] | Area %  |
|--------|---------------|------|-------------|--------------|--------------|---------|
| 1      | 7.176         | BB   | 0.1394      | 5376.48730   | 595.25037    | 48.9660 |
| 2      | 8.541         | MF   | 0.1927      | 5603.55176   | 484.58673    | 51.0340 |

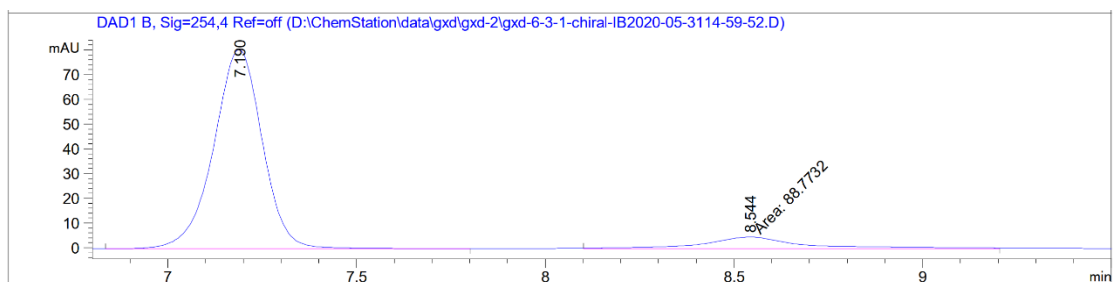

Signal 2: DAD1 B, Sig=254,4 Ref=off

| Peak # | RetTime [min] | Type | Width [min] | Area [mAU*s] | Height [mAU] | Area %  |
|--------|---------------|------|-------------|--------------|--------------|---------|
| 1      | 7.190         | BB   | 0.1364      | 721.74207    | 80.68765     | 89.0473 |
| 2      | 8.544         | MF   | 0.3148      | 88.77319     | 4.70005      | 10.9527 |

Totals : 810.51526 85.38771

### (4-chloro-2-(((R)-thiochroman-4-yl)amino)phenyl)(phenyl)methanol (3nm)

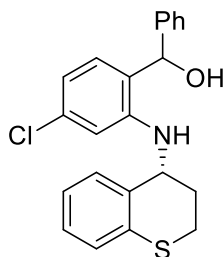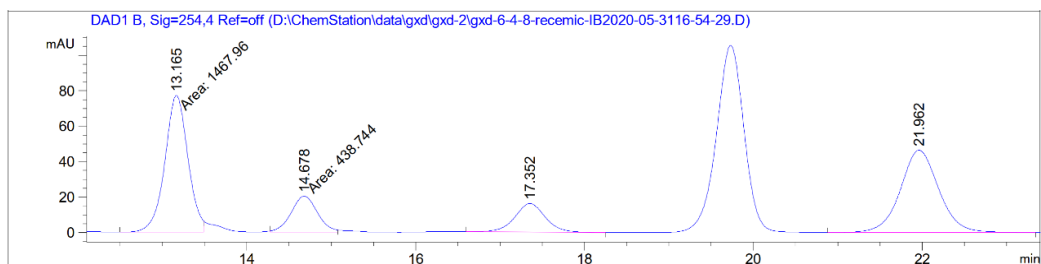

Signal 2: DAD1 B, Sig=254,4 Ref=off

| Peak # | RetTime [min] | Type | Width [min] | Area [mAU*s] | Height [mAU] | Area %  |
|--------|---------------|------|-------------|--------------|--------------|---------|
| 1      | 13.165        | MF   | 0.3171      | 1467.96484   | 77.14549     | 38.8365 |
| 2      | 14.678        | FM   | 0.3601      | 438.74365    | 20.30690     | 11.6074 |
| 3      | 17.352        | BB   | 0.3821      | 406.78787    | 16.13917     | 10.7620 |
| 4      | 21.962        | BB   | 0.4788      | 1466.36462   | 46.39190     | 38.7941 |

Totals : 3779.86099 159.98346

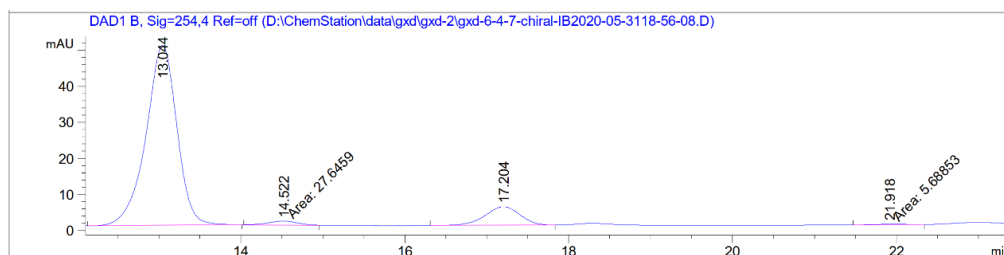

Signal 2: DAD1 B, Sig=254,4 Ref=off

| Peak # | RetTime [min] | Type | Width [min] | Area [mAU*s] | Height [mAU] | Area %  |
|--------|---------------|------|-------------|--------------|--------------|---------|
| 1      | 13.044        | BB   | 0.3987      | 1310.67456   | 49.86439     | 87.6326 |
| 2      | 14.522        | MM   | 0.4177      | 27.64594     | 1.10318      | 1.8484  |
| 3      | 17.204        | BB   | 0.4482      | 151.63867    | 5.14004      | 10.1387 |
| 4      | 21.918        | MM   | 0.5140      | 5.68853      | 1.84449e-1   | 0.3803  |

Totals : 1495.64770 56.29207

**(R)-(4-chloro-2-(thiochroman-4-ylamino)phenyl)(phenyl)methanone (3nm')**

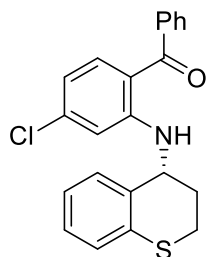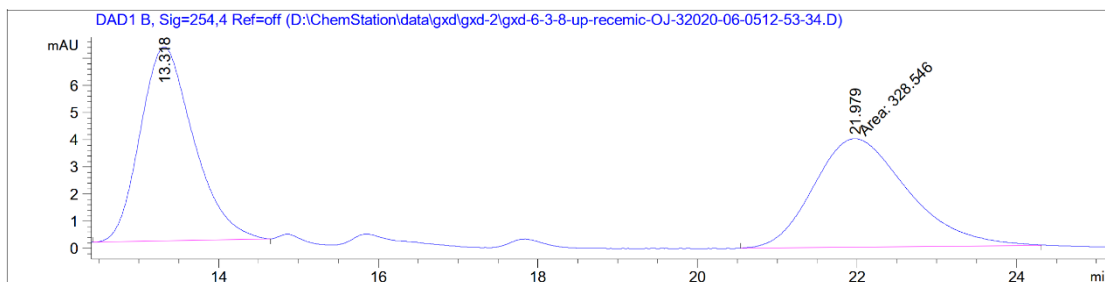

Signal 2: DAD1 B, Sig=254,4 Ref=off

| Peak # | RetTime [min] | Type | Width [min] | Area [mAU*s] | Height [mAU] | Area %  |
|--------|---------------|------|-------------|--------------|--------------|---------|
| 1      | 13.318        | BB   | 0.6869      | 332.51227    | 7.14550      | 50.3000 |
| 2      | 21.979        | MM   | 1.3691      | 328.54565    | 3.99968      | 49.7000 |

Totals : 661.05792 11.14518

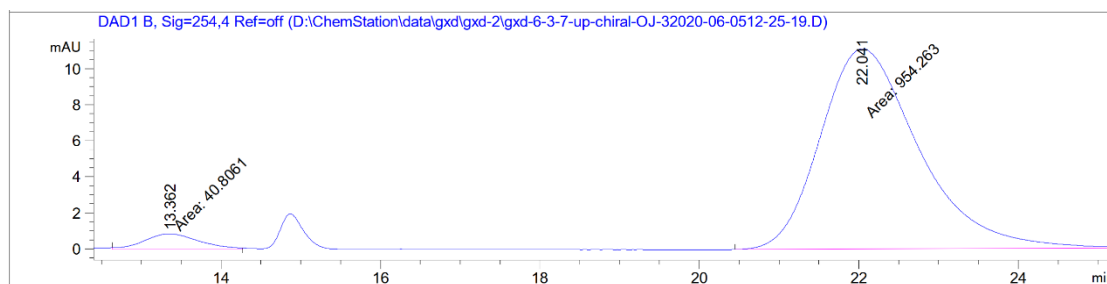

Signal 2: DAD1 B, Sig=254,4 Ref=off

| Peak # | RetTime [min] | Type | Width [min] | Area [mAU*s] | Height [mAU] | Area %  |
|--------|---------------|------|-------------|--------------|--------------|---------|
| 1      | 13.362        | MM   | 0.7951      | 40.80608     | 8.55317e-1   | 4.1008  |
| 2      | 22.041        | MF   | 1.4322      | 954.26312    | 11.10505     | 95.8992 |

Totals : 995.06920 11.96036

### 1-(2-(((R)-thiochroman-4-yl)amino)phenyl)ethan-1-ol (3nl)

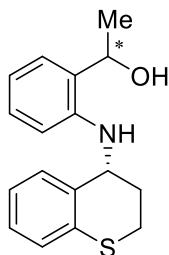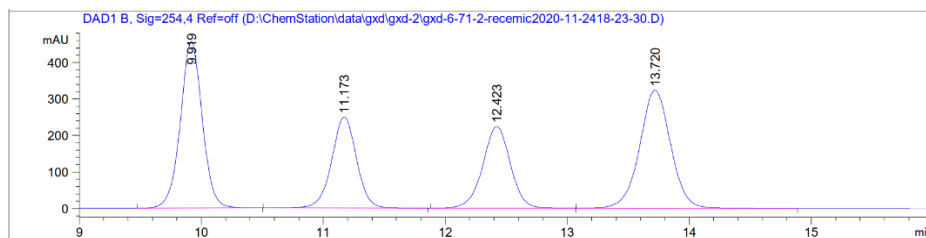

Signal 2: DAD1 B, Sig=254,4 Ref=off

| Peak # | RetTime [min] | Type | Width [min] | Area [mAU*s] | Height [mAU] | Area %  |
|--------|---------------|------|-------------|--------------|--------------|---------|
| 1      | 9.919         | BB   | 0.1918      | 5709.18799   | 456.83337    | 30.8331 |
| 2      | 11.173        | BB   | 0.2159      | 3556.79150   | 250.09726    | 19.2089 |
| 3      | 12.423        | BB   | 0.2419      | 3530.35742   | 223.93298    | 19.0661 |
| 4      | 13.720        | BB   | 0.2700      | 5720.07617   | 323.88736    | 30.8919 |

Totals : 1.85164e4 1254.75098

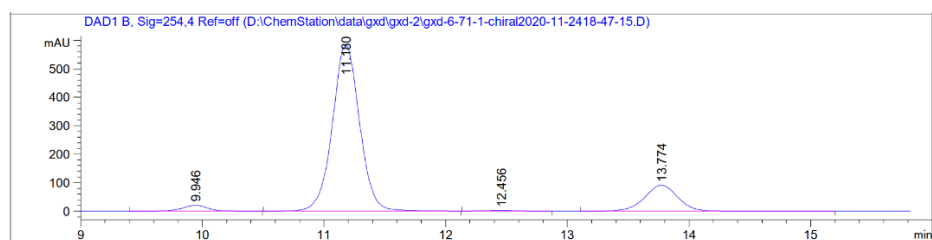

Signal 2: DAD1 B, Sig=254,4 Ref=off

| Peak # | RetTime [min] | Type | Width [min] | Area [mAU*s] | Height [mAU] | Area %  |
|--------|---------------|------|-------------|--------------|--------------|---------|
| 1      | 9.946         | BB   | 0.2156      | 285.08511    | 20.08410     | 2.5683  |
| 2      | 11.180        | BB   | 0.2364      | 9051.78027   | 585.49432    | 81.5469 |
| 3      | 12.456        | BB   | 0.2434      | 36.40385     | 2.29055      | 0.3280  |
| 4      | 13.774        | BB   | 0.2917      | 1726.82666   | 90.88046     | 15.5569 |

Totals : 1.11001e4 698.74944

### (R)-1-(2-(thiochroman-4-ylamino)phenyl)ethan-1-one (3nl')

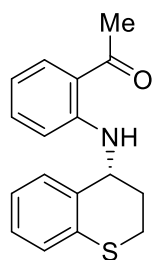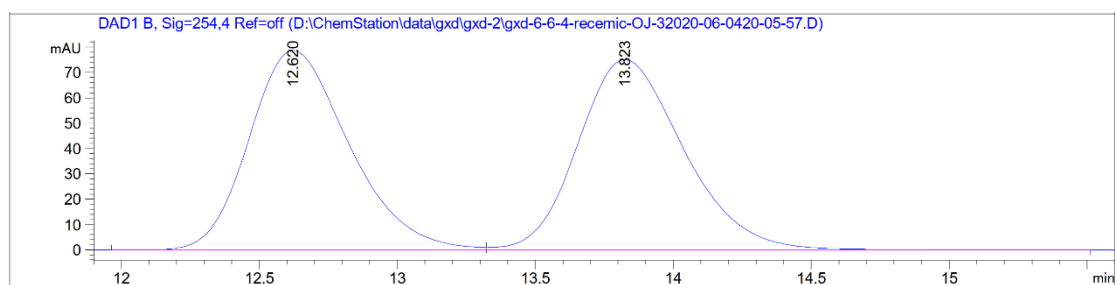

Signal 2: DAD1 B, Sig=254,4 Ref=off

| Peak # | RetTime [min] | Type | Width [min] | Area [mAU*s] | Height [mAU] | Area %  |
|--------|---------------|------|-------------|--------------|--------------|---------|
| 1      | 12.620        | BV   | 0.3855      | 1983.91479   | 78.85223     | 49.7518 |
| 2      | 13.823        | VB   | 0.4113      | 2003.70911   | 75.09126     | 50.2482 |

Totals : 3987.62390 153.94349

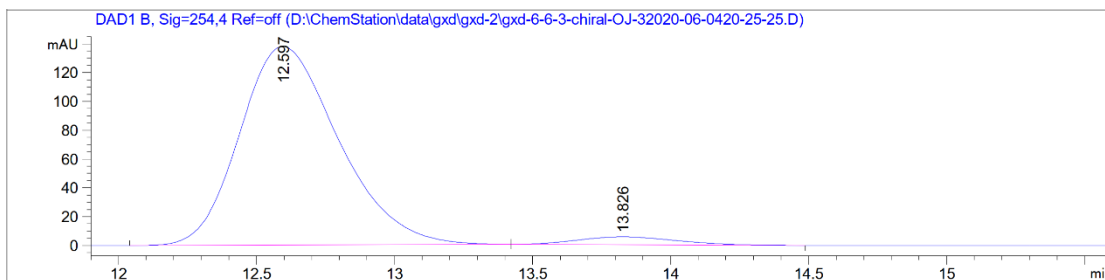

Signal 2: DAD1 B, Sig=254,4 Ref=off

| Peak # | RetTime [min] | Type | Width [min] | Area [mAU*s] | Height [mAU] | Area %  |
|--------|---------------|------|-------------|--------------|--------------|---------|
| 1      | 12.597        | BB   | 0.3823      | 3433.37622   | 137.98973    | 96.2273 |
| 2      | 13.826        | BB   | 0.3842      | 134.60760    | 5.44973      | 3.7727  |

Totals : 3567.98383 143.43946

**ethyl 2-(1-((R)-chroman-4-yl)-2-oxo-1,2,3,5-tetrahydrobenzo[e][1,4]oxazepin-3-yl)acetate (4)**

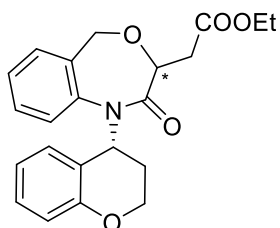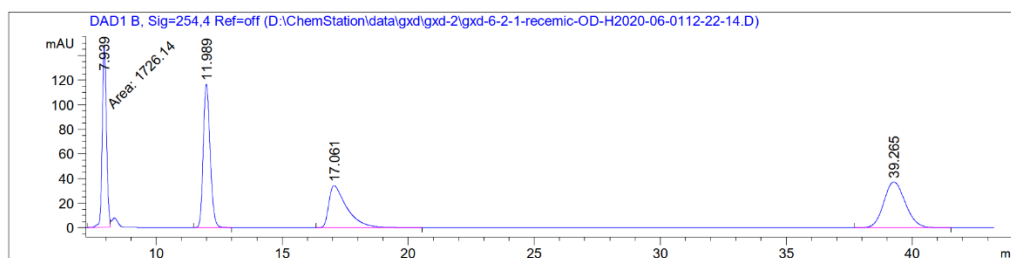

Signal 1: DAD1 B, Sig=254,4 Ref=off

| Peak # | RetTime [min] | Type | Width [min] | Area [mAU*s] | Height [mAU] | Area %  |
|--------|---------------|------|-------------|--------------|--------------|---------|
| 1      | 7.939         | MF   | 0.1943      | 1726.13623   | 148.06203    | 22.0325 |
| 2      | 11.989        | BB   | 0.2929      | 2203.70654   | 116.36733    | 28.1283 |
| 3      | 17.061        | BB   | 0.7132      | 1694.15002   | 34.12495     | 21.6243 |
| 4      | 39.265        | BB   | 0.9157      | 2210.49512   | 37.17818     | 28.2149 |

Totals : 7834.48792 335.73249

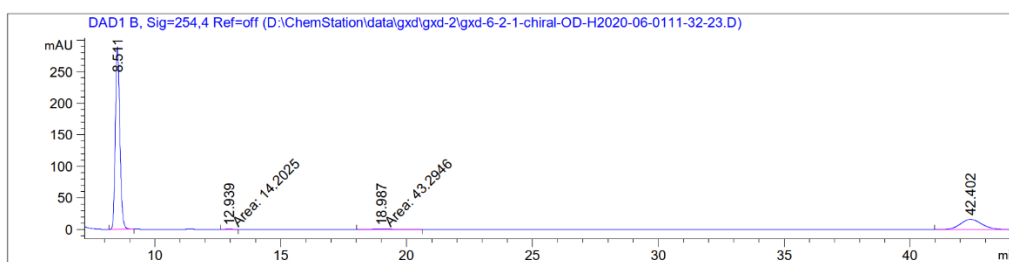

Signal 1: DAD1 B, Sig=254,4 Ref=off

| Peak # | RetTime [min] | Type | Width [min] | Area [mAU*s] | Height [mAU] | Area %  |
|--------|---------------|------|-------------|--------------|--------------|---------|
| 1      | 8.511         | BB   | 0.1912      | 3595.29175   | 288.85440    | 78.2157 |
| 2      | 12.939        | MM   | 0.3325      | 14.20251     | 7.11811e-1   | 0.3090  |
| 3      | 18.987        | MM   | 1.0218      | 43.29458     | 7.06166e-1   | 0.9419  |
| 4      | 42.402        | BB   | 0.8791      | 943.84888    | 16.07265     | 20.5335 |

Totals : 4596.63771 306.34502

### (R)-1-(chroman-4-yl)-1,4-dihydro-2H-benzo[d][1,3]oxazine (5)

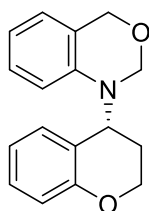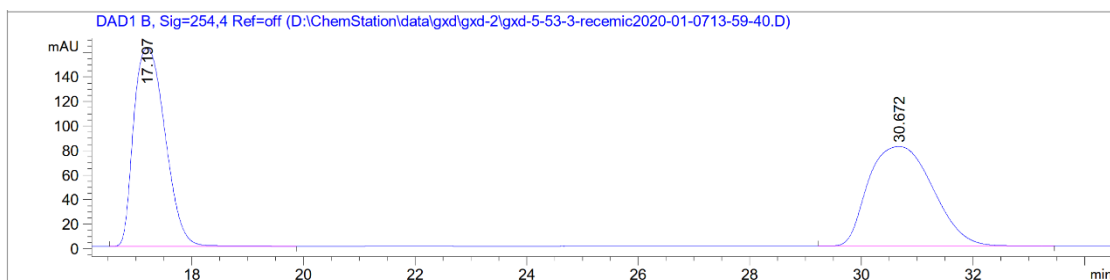

Signal 2: DAD1 B, Sig=254,4 Ref=off

| Peak # | RetTime [min] | Type | Width [min] | Area [mAU*s] | Height [mAU] | Area %  |
|--------|---------------|------|-------------|--------------|--------------|---------|
| 1      | 17.197        | BB   | 0.6351      | 6313.16064   | 161.85327    | 49.2516 |
| 2      | 30.672        | BB   | 1.3026      | 6505.01367   | 81.20108     | 50.7484 |

Totals : 1.28182e4 243.05435

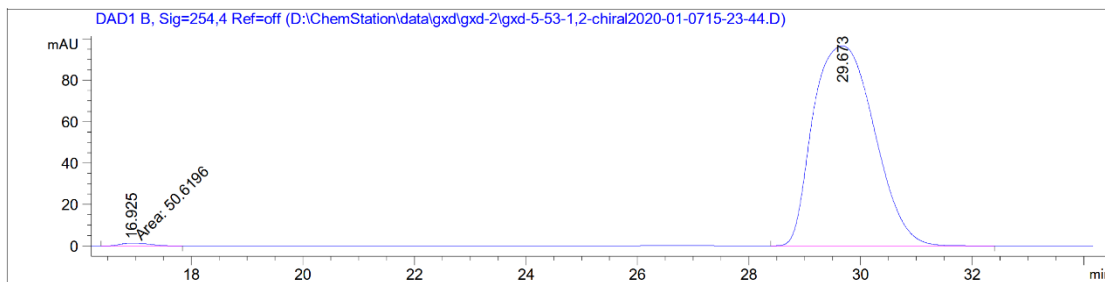

Signal 2: DAD1 B, Sig=254,4 Ref=off

| Peak # | RetTime [min] | Type | Width [min] | Area [mAU*s] | Height [mAU] | Area %  |
|--------|---------------|------|-------------|--------------|--------------|---------|
| 1      | 16.925        | MM   | 0.6228      | 50.61965     | 1.35468      | 0.6814  |
| 2      | 29.673        | BB   | 1.2486      | 7378.16650   | 96.65584     | 99.3186 |

Totals : 7428.78615 98.01051
